# Supplementary material for: Maternal lipidomic signatures in relation to spontaneous preterm birth and large-for-gestational age neonates
Source: Sci Rep. 2021 Apr 14;11:8115. doi: 10.1038/s41598-021-87472-9 (PMC8046995; doi:10.1038/s41598-021-87472-9)
Supplement: Supplementary file 1 — Supplementary Information 1. [file 41598_2021_87472_MOESM1_ESM.xlsx]

## Sheet: Lipidome_Correlation_Coefficien
Supplemental Table 1. Spearman Correlation coefficents for lipid metabolites
	FFA.16.0.	FFA.18.0.	FFA.18.1.	FFA.18.2.	FFA.20.0.	FFA.20.1.	FFA.20.2.	FFA.20.4..Arachidonic.acid	FFA.22.0.	FFA.22.1.	FFA.22.2.	FFA.22.3.	FFA.24.0.	FFA.24.1.	FFA.24.2.	FFA.24.3.	FAHFA.36.0	FAHFA.40.3	X16.0.Cholesteryl.ester	X16.1.Cholesteryl.ester	X17.1.Cholesteryl.ester	X18.0.Cholesteryl.ester	X18.1.Cholesteryl.ester	X18.2.Cholesteryl.ester	X18.3.Cholesteryl.ester	X20.2.Cholesteryl.ester	X20.3.Cholesteryl.ester	X20.4.Cholesteryl.ester	X20.5.Cholesteryl.ester	X22.4.Cholesteryl.ester	X22.5.Cholesteryl.ester	X22.6.Cholesteryl.ester	Acylcarnitine.14.1	Acylcarnitine.16.0	Acylcarnitine.18.0	Acylcarnitine.18.1	Acylcarnitine.18.2	Acylcarnitine.24.0	Acylcarnitine.26.0	Cer.AS..36.1	Cer.AS..42.2	Cer.EODS..51.0	Cer.EODS..53.0	Cer.EODS..58.0	Cer.NDS..34.0	Cer.NDS..36.0	Cer.NDS..40.0	Cer.NDS..41.0	Cer.NDS..42.0
FFA.16.0.		0.879784	0.585695	0.455746	0.839556	0.649817	0.487945	0.217366	0.537342	0.41625	0.373237	0.48228	-0.00837684	0.318032	0.611713	0.0818962	0.14255	0.15658	-0.245509	0.151839	0.0520612	-0.268983	-0.153963	0.01961	-0.199028	0.0525653	0.127405	0.0480768	-0.0368437	0.0945455	-0.178134	-0.00978098	0.0586859	0.337018	0.0514011	0.404188	0.193735	-0.299154	-0.106823	-0.14069	0.233411	-0.0746715	0.0712991	0.153495	0.160024	0.32198	0.205617	0.20216	0.131413
FFA.18.0.	0.879784		0.246589	0.122184	0.935578	0.352511	0.183354	-0.0685269	0.694857	0.330057	0.131233	0.250741	0.0156496	0.13859	0.465587	-0.0388359	0.144554	0.145839	-0.43592	0.0627063	-0.0474287	-0.222034	-0.397456	-0.137954	-0.296082	-0.0730033	-0.0225383	-0.0566217	-0.0614101	0.0187459	-0.199076	-0.0920612	-0.0724993	0.179262	-0.0382838	0.222334	0.0265587	-0.438476	-0.212901	-0.0512931	0.152787	-0.0905731	0.155668	0.0957576	0.137042	0.133861	0.0030363	0.0712511	-0.0861686
FFA.18.1.	0.585695	0.246589		0.913939	0.268515	0.942442	0.884536	0.656886	-0.00150015	0.328713	0.622934	0.668695	-0.0169217	0.524968	0.634611	0.25667	0.000864086	0.0792919	0.300186	0.0769637	0.185695	-0.122868	0.343606	0.308767	0.147123	0.257462	0.219262	0.226475	0.0471287	0.080024	-0.0425323	0.117876	0.334473	0.412193	0.254089	0.528845	0.395032	0.127717	0.138746	-0.283024	0.171377	6.0006e-05	-0.110063	0.20342	0.112055	0.350195	0.39814	0.278788	0.409205
FFA.18.2.	0.455746	0.122184	0.913939		0.146475	0.861962	0.856334	0.6824	-0.0810561	0.316016	0.627111	0.634803	0.0156376	0.462154	0.60126	0.316616	-0.0359676	0.0347915	0.394083	-0.00711671	0.15916	0.0246745	0.378242	0.420414	0.186967	0.34207	0.1985	0.282892	0.0655386	0.0716352	0.0428563	0.165809	0.395596	0.363204	0.226571	0.498014	0.467135	0.165125	0.174845	-0.236832	0.146139	0.0176658	-0.0873087	0.250801	0.155704	0.311671	0.396676	0.286901	0.440744
FFA.20.0.	0.839556	0.935578	0.268515	0.146475		0.37517	0.187375	-0.0638944	0.679472	0.339022	0.168749	0.256514	0.0265707	0.134653	0.45853	-0.0358356	0.148863	0.138014	-0.376922	0.0649505	-0.0290669	-0.216454	-0.343306	-0.0720672	-0.300426	-0.0525533	-0.0679148	-0.0305911	-0.0590699	-0.029619	-0.186415	-0.0584098	-0.0586859	0.129289	-0.029739	0.245317	0.0419562	-0.39808	-0.209613	-0.079964	0.114647	-0.170825	0.135674	0.116844	0.150639	0.168101	0.0336874	0.0884848	-0.0363876
FFA.20.1.	0.649817	0.352511	0.942442	0.861962	0.37517		0.888041	0.641512	0.106271	0.375806	0.68282	0.681284	-0.0111491	0.548863	0.690309	0.271959	0.0457006	0.0793399	0.243276	0.0455926	0.198128	-0.166049	0.273987	0.299922	0.154587	0.219946	0.203684	0.215026	0.00691269	0.0675668	-0.0891089	0.123408	0.33619	0.396856	0.295194	0.566637	0.385167	0.0954695	0.159052	-0.255038	0.237984	-0.0029763	-0.12216	0.244332	0.149871	0.427135	0.445761	0.300474	0.442436
FFA.20.2.	0.487945	0.183354	0.884536	0.856334	0.187375	0.888041		0.724248	-0.120348	0.25961	0.700654	0.72348	-0.0612421	0.475896	0.68012	0.41781	-0.0657186	0.103762	0.327813	0.0670027	0.20426	-0.117732	0.340618	0.361716	0.192667	0.294893	0.225203	0.266295	0.050177	0.126553	0.0261266	0.154587	0.382694	0.425635	0.29565	0.57595	0.498422	0.185023	0.142718	-0.262262	0.174461	0.0156496	-0.10225	0.225503	0.0341434	0.29625	0.31694	0.18267	0.367045
FFA.20.4..Arachidonic.acid	0.217366	-0.0685269	0.656886	0.6824	-0.0638944	0.641512	0.724248		-0.320024	0.171989	0.631767	0.602424	0.0485689	0.425707	0.426727	0.408209	-0.0491209	0.0723912	0.432883	0.142142	0.247501	-0.0414641	0.60108	0.452865	0.4373	0.506295	0.299766	0.455374	0.313075	0.121704	0.0281428	0.34327	0.416862	0.277672	0.328521	0.313495	0.495038	0.369985	0.337378	-0.264338	0.285677	-0.0406721	-0.151287	0.321008	0.135698	0.447789	0.513687	0.338122	0.572349
FFA.22.0.	0.537342	0.694857	-0.00150015	-0.0810561	0.679472	0.106271	-0.120348	-0.320024		0.305719	-0.0665467	0.0774557	0.107387	0.121992	0.276664	-0.199232	0.277444	-0.00375638	-0.460618	0.010261	-0.149031	-0.112223	-0.475104	-0.268575	-0.36396	-0.249289	-0.03982	-0.127597	-0.145287	0.0340234	-0.0978458	-0.135074	-0.175866	0.0785119	-0.173561	0.0105971	-0.244644	-0.464086	-0.366877	0.249841	0.000408041	-0.00816082	0.0694869	-0.0244704	0.147171	0.115836	-0.0758116	0.113987	-0.106007
FFA.22.1.	0.41625	0.330057	0.328713	0.316016	0.339022	0.375806	0.25961	0.171989	0.305719		0.307111	0.255362	0.0159736	0.24198	0.419358	0.0210741	0.228479	-0.0569577	-0.0514971	0.106451	0.103474	-0.0929973	0.0125413	0.0877048	-0.0407921	0.134929	0.116304	0.150663	0.0288149	0.0849925	0.0242784	0.104782	0.0438884	0.137258	0.126985	0.107411	0.09997	-0.0644704	-0.0757756	0.129541	0.164236	-0.0371557	-0.020162	0.163108	0.193051	0.18255	0.234143	0.0868167	0.143018
FFA.22.2.	0.373237	0.131233	0.622934	0.627111	0.168749	0.68282	0.700654	0.631767	-0.0665467	0.307111		0.549955	0.0229463	0.579046	0.587243	0.426679	-0.0713471	0.080312	0.211209	0.223522	0.352463	-0.104098	0.379178	0.378218	0.261554	0.374881	0.216082	0.282472	0.155068	0.193831	0.0029523	0.192583	0.305023	0.340474	0.252325	0.465947	0.392367	0.201428	0.140042	-0.139262	0.141974	-0.10027	-0.0933093	0.30177	0.198992	0.455506	0.504914	0.342742	0.547231
FFA.22.3.	0.48228	0.250741	0.668695	0.634803	0.256514	0.681284	0.72348	0.602424	0.0774557	0.255362	0.549955		0.00589259	0.41991	0.666799	0.390003	0.0134053	0.121608	0.233771	0.0628383	0.159352	-0.151659	0.261914	0.17877	0.156124	0.267279	0.177426	0.198032	0.153747	0.0647585	-0.0732553	0.115356	0.251977	0.335374	0.286565	0.401968	0.428899	0.18207	0.0882448	-0.244308	0.263498	0.00123612	-0.136658	0.294353	0.0313711	0.390843	0.305995	0.214317	0.332745
FFA.24.0.	-0.00837684	0.0156496	-0.0169217	0.0156376	0.0265707	-0.0111491	-0.0612421	0.0485689	0.107387	0.0159736	0.0229463	0.00589259		0.224302	0.0672787	0.118608	-0.0070207	0.0234984	0.134053	-0.109919	-0.0475848	0.137918	0.0825443	-0.0089649	0.00936094	0.0717672	-0.196916	-0.0679628	-0.0306031	-0.139778	-0.0750675	-0.079508	-0.060462	-0.126445	0.00380438	-0.126841	-0.101542	0.0782478	0.0308311	0.0968497	-0.00124813	0.0342394	0.180246	-0.0406961	0.158896	0.0373117	0.0623462	0.030159	0.0934173
FFA.24.1.	0.318032	0.13859	0.524968	0.462154	0.134653	0.548863	0.475896	0.425707	0.121992	0.24198	0.579046	0.41991	0.224302		0.477708	0.344254	-0.00387639	0.0809121	0.291689	0.232547	0.250669	-0.0382598	0.363132	0.277948	0.232763	0.351467	0.206793	0.255254	0.147747	0.148083	-0.0824842	0.191239	0.189283	0.429271	0.314251	0.454101	0.34099	0.301218	0.309775	-0.0108251	0.117816	-0.248209	-0.205245	0.165125	0.344998	0.390543	0.53559	0.452193	0.518056
FFA.24.2.	0.611713	0.465587	0.634611	0.60126	0.45853	0.690309	0.68012	0.426727	0.276664	0.419358	0.587243	0.666799	0.0672787	0.477708		0.325053	0.0030123	0.0933933	0.0714791	0.0628623	0.174473	-0.0248425	0.0852925	0.213813	0.0354515	0.26165	0.156352	0.198092	0.0369397	0.213993	0.0154095	0.0734113	0.227291	0.349343	0.216658	0.483576	0.4439	-0.0409361	-0.0735914	-0.16078	0.173033	-0.0230063	0.030483	0.233891	0.288989	0.356856	0.355344	0.185395	0.32432
FFA.24.3.	0.0818962	-0.0388359	0.25667	0.316616	-0.0358356	0.271959	0.41781	0.408209	-0.199232	0.0210741	0.426679	0.390003	0.118608	0.344254	0.325053		-0.193975	0.0890129	0.374389	0.030399	0.16348	0.0859646	0.284284	0.390039	0.21853	0.394347	0.142862	0.282004	0.190831	0.206889	0.0841884	0.269427	0.137786	0.251317	0.209157	0.289037	0.448341	0.30429	0.351419	-0.207117	0.147015	-0.0787159	-0.0123972	0.167801	0.0945935	0.192223	0.259754	0.164224	0.331161
FAHFA.36.0	0.14255	0.144554	0.000864086	-0.0359676	0.148863	0.0457006	-0.0657186	-0.0491209	0.277444	0.228479	-0.0713471	0.0134053	-0.0070207	-0.00387639	0.0030123	-0.193975		0.0655266	-0.24486	-0.0739634	-0.214749	-0.154887	-0.341134	-0.275776	-0.121104	-0.263234	-0.113567	-0.136142	-0.170705	-0.171773	-0.080504	-0.139178	-0.0680948	-0.119976	-0.160972	-0.0239784	-0.266511	-0.198272	-0.122364	0.232967	-0.00726073	0.0413681	0.0417642	-0.080408	-0.00444044	-0.00262826	-0.0917612	-0.0020042	-0.150627
FAHFA.40.3	0.15658	0.145839	0.0792919	0.0347915	0.138014	0.0793399	0.103762	0.0723912	-0.00375638	-0.0569577	0.080312	0.121608	0.0234984	0.0809121	0.0933933	0.0890129	0.0655266		-0.0966817	0.0794479	-0.0459286	0.00466847	-0.020162	0.0210621	0.118092	0.0620222	0.0515692	0.00090009	0.120516	-0.0315752	-0.188407	-0.0149415	-0.129121	0.105131	0.158116	0.0794359	0.140174	-0.0119292	-0.0326793	-0.0990699	0.0374557	-0.166061	-0.109379	0.110459	0.0983618	0.0818002	0.0636544	0.119664	0.0834683
X16.0.Cholesteryl.ester	-0.245509	-0.43592	0.300186	0.394083	-0.376922	0.243276	0.327813	0.432883	-0.460618	-0.0514971	0.211209	0.233771	0.134053	0.291689	0.0714791	0.374389	-0.24486	-0.0966817		-0.0405401	0.290945	0.184134	0.608797	0.386511	0.353651	0.350579	0.144938	0.262286	0.162088	0.115824	0.0990819	0.234743	0.286133	0.1642	0.0982418	0.192679	0.31964	0.485929	0.4373	-0.161788	0.0542094	0.0987699	-0.0947615	0.070327	0.0689109	0.0674707	0.256586	0.0306511	0.34255
X16.1.Cholesteryl.ester	0.151839	0.0627063	0.0769637	-0.00711671	0.0649505	0.0455926	0.0670027	0.142142	0.010261	0.106451	0.223522	0.0628383	-0.109919	0.232547	0.0628623	0.030399	-0.0739634	0.0794479	-0.0405401		0.363516	-0.236004	0.24258	0.0456406	0.17649	0.273975	0.466391	0.187951	0.388731	0.275524	0.0642064	0.128833	-0.149943	0.0129973	-0.0175338	0.0341314	-0.0945575	-0.0059886	-0.145839	0.143714	-0.00387639	-0.12294	-0.172001	0.0435884	0.233927	0.133297	0.192319	0.233015	0.17967
X17.1.Cholesteryl.ester	0.0520612	-0.0474287	0.185695	0.15916	-0.0290669	0.198128	0.20426	0.247501	-0.149031	0.103474	0.352463	0.159352	-0.0475848	0.250669	0.174473	0.16348	-0.214749	-0.0459286	0.290945	0.363516		0.0629223	0.395644	0.277276	0.248065	0.277348	0.338794	0.267483	0.305443	0.229427	0.0322472	0.265683	-0.00658866	0.0114971	0.102682	-0.0173657	-0.0129133	0.198764	0.113207	-0.0570537	0.0779238	-0.203012	-0.138746	0.159604	0.233939	0.123576	0.134545	0.0922772	0.173381
X18.0.Cholesteryl.ester	-0.268983	-0.222034	-0.122868	0.0246745	-0.216454	-0.166049	-0.117732	-0.0414641	-0.112223	-0.0929973	-0.104098	-0.151659	0.137918	-0.0382598	-0.0248425	0.0859646	-0.154887	0.00466847	0.184134	-0.236004	0.0629223		-0.0422442	0.422502	-0.0467567	0.21583	0.148179	0.343786	0.221026	0.219814	0.571437	0.361728	0.290657	0.0321152	-0.18171	-0.0515572	0.0613141	0.0849805	-0.030471	0.109151	-0.211977	0.146019	0.200228	-0.0458806	0.0763036	-0.220282	-0.0906211	-0.0568617	-0.0644104
X18.1.Cholesteryl.ester	-0.153963	-0.397456	0.343606	0.378242	-0.343306	0.273987	0.340618	0.60108	-0.475104	0.0125413	0.379178	0.261914	0.0825443	0.363132	0.0852925	0.284284	-0.341134	-0.020162	0.608797	0.24258	0.395644	-0.0422442		0.499226	0.470519	0.567897	0.323912	0.378458	0.373873	0.156196	0.0020402	0.33835	0.168833	0.133861	0.217642	0.142634	0.349643	0.608221	0.409541	-0.2358	0.274251	-0.0850285	-0.231431	0.186043	0.262598	0.29805	0.430087	0.221518	0.533981
X18.2.Cholesteryl.ester	0.01961	-0.137954	0.308767	0.420414	-0.0720672	0.299922	0.361716	0.452865	-0.268575	0.0877048	0.378218	0.17877	-0.0089649	0.277948	0.213813	0.390039	-0.275776	0.0210621	0.386511	0.0456406	0.277276	0.422502	0.499226		0.150627	0.670219	0.488833	0.732589	0.471863	0.271083	0.454017	0.695578	0.384158	0.213561	-0.0213861	0.230699	0.350183	0.399688	0.236904	-0.1155	0.0442844	-0.0367717	-0.00352835	0.250441	0.310471	0.176346	0.3185	0.188863	0.38075
X18.3.Cholesteryl.ester	-0.199028	-0.296082	0.147123	0.186967	-0.300426	0.154587	0.192667	0.4373	-0.36396	-0.0407921	0.261554	0.156124	0.00936094	0.232763	0.0354515	0.21853	-0.121104	0.118092	0.353651	0.17649	0.248065	-0.0467567	0.470519	0.150627		0.280744	0.102298	0.0382718	0.170777	-0.0764356	-0.258266	0.0283108	0.0676148	0.0627903	0.448545	0.109331	0.20126	0.388407	0.461386	-0.237348	0.323396	0.0271707	-0.29979	0.254221	0.178434	0.283156	0.388107	0.389127	0.398968
X20.2.Cholesteryl.ester	0.0525653	-0.0730033	0.257462	0.34207	-0.0525533	0.219946	0.294893	0.506295	-0.249289	0.134929	0.374881	0.267279	0.0717672	0.351467	0.26165	0.394347	-0.263234	0.0620222	0.350579	0.273975	0.277348	0.21583	0.567897	0.670219	0.280744		0.512091	0.66315	0.590327	0.393351	0.291749	0.62087	0.365185	0.227207	0.0758476	0.13553	0.418722	0.379598	0.254605	-0.101962	0.0756796	-0.0708431	0.0427483	0.328773	0.392643	0.193987	0.333069	0.251641	0.399784
X20.3.Cholesteryl.ester	0.127405	-0.0225383	0.219262	0.1985	-0.0679148	0.203684	0.225203	0.299766	-0.03982	0.116304	0.216082	0.177426	-0.196916	0.206793	0.156352	0.142862	-0.113567	0.0515692	0.144938	0.466391	0.338794	0.148179	0.323912	0.488833	0.102298	0.512091		0.644452	0.545083	0.573429	0.393483	0.59724	0.183186	0.19718	-0.101254	0.198236	0.128185	0.108467	-0.0557936	0.192247	0.0529253	0.00316832	-0.117324	0.0709751	0.265119	0.233291	0.19604	0.22375	0.201392
X20.4.Cholesteryl.ester	0.0480768	-0.0566217	0.226475	0.282892	-0.0305911	0.215026	0.266295	0.455374	-0.127597	0.150663	0.282472	0.198032	-0.0679628	0.255254	0.198092	0.282004	-0.136142	0.00090009	0.262286	0.187951	0.267483	0.343786	0.378458	0.732589	0.0382718	0.66315	0.644452		0.723984	0.515908	0.645281	0.879448	0.375674	0.26489	-0.115272	0.187963	0.298794	0.224722	0.049517	0.0654545	0.0613021	-0.0581218	0.0491089	0.205473	0.224266	0.0941254	0.189739	0.153843	0.230435
X20.5.Cholesteryl.ester	-0.0368437	-0.0614101	0.0471287	0.0655386	-0.0590699	0.00691269	0.050177	0.313075	-0.145287	0.0288149	0.155068	0.153747	-0.0306031	0.147747	0.0369397	0.190831	-0.170705	0.120516	0.162088	0.388731	0.305443	0.221026	0.373873	0.471863	0.170777	0.590327	0.545083	0.723984		0.333381	0.370645	0.73751	0.21655	0.0753435	-0.145851	-0.0877048	0.176058	0.210465	0.0718992	0.0632463	-0.00730873	-0.0578938	-0.0778998	0.278716	0.194455	0.0972817	0.228659	0.256166	0.242472
X22.4.Cholesteryl.ester	0.0945455	0.0187459	0.080024	0.0716352	-0.029619	0.0675668	0.126553	0.121704	0.0340234	0.0849925	0.193831	0.0647585	-0.139778	0.148083	0.213993	0.206889	-0.171773	-0.0315752	0.115824	0.275524	0.229427	0.219814	0.156196	0.271083	-0.0764356	0.393351	0.573429	0.515908	0.333381		0.532121	0.464986	0.182502	0.348599	-0.198728	0.289577	0.225299	-0.158536	-0.099802	0.266991	-0.0312511	0.0494569	0.0915692	-0.0160936	0.110891	-0.0677108	-0.0482448	-0.0436844	-0.0161896
X22.5.Cholesteryl.ester	-0.178134	-0.199076	-0.0425323	0.0428563	-0.186415	-0.0891089	0.0261266	0.0281428	-0.0978458	0.0242784	0.0029523	-0.0732553	-0.0750675	-0.0824842	0.0154095	0.0841884	-0.080504	-0.188407	0.0990819	0.0642064	0.0322472	0.571437	0.0020402	0.454017	-0.258266	0.291749	0.393483	0.645281	0.370645	0.532121		0.586859	0.357012	0.10285	-0.469415	0.0124932	0.00736874	-0.089661	-0.233063	0.2809	-0.313399	0.0864326	0.282376	-0.0810801	-0.0508371	-0.308083	-0.249349	-0.28246	-0.199568
X22.6.Cholesteryl.ester	-0.00978098	-0.0920612	0.117876	0.165809	-0.0584098	0.123408	0.154587	0.34327	-0.135074	0.104782	0.192583	0.115356	-0.079508	0.191239	0.0734113	0.269427	-0.139178	-0.0149415	0.234743	0.128833	0.265683	0.361728	0.33835	0.695578	0.0283108	0.62087	0.59724	0.879448	0.73751	0.464986	0.586859		0.301026	0.230975	-0.120576	0.117912	0.281488	0.174161	0.0734833	0.0531413	0.00823282	-0.11502	0.030399	0.229523	0.170585	0.130069	0.193063	0.198044	0.255074
Acylcarnitine.14.1	0.0586859	-0.0724993	0.334473	0.395596	-0.0586859	0.33619	0.382694	0.416862	-0.175866	0.0438884	0.305023	0.251977	-0.060462	0.189283	0.227291	0.137786	-0.0680948	-0.129121	0.286133	-0.149943	-0.00658866	0.290657	0.168833	0.384158	0.0676148	0.365185	0.183186	0.375674	0.21655	0.182502	0.357012	0.301026		0.19568	-0.070015	0.235512	0.224854	0.0705071	0.125605	-0.0478848	-0.0812721	0.159832	0.103786	0.060258	0.0827723	0.118908	0.108131	-0.0558296	0.130009
Acylcarnitine.16.0	0.337018	0.179262	0.412193	0.363204	0.129289	0.396856	0.425635	0.277672	0.0785119	0.137258	0.340474	0.335374	-0.126445	0.429271	0.349343	0.251317	-0.119976	0.105131	0.1642	0.0129973	0.0114971	0.0321152	0.133861	0.213561	0.0627903	0.227207	0.19718	0.26489	0.0753435	0.348599	0.10285	0.230975	0.19568		0.122328	0.622058	0.513807	0.0511251	0.152019	-0.101938	0.129253	0.0446205	-0.125389	0.172481	-0.0229703	0.170717	0.198836	0.249673	0.244716
Acylcarnitine.18.0	0.0514011	-0.0382838	0.254089	0.226571	-0.029739	0.295194	0.29565	0.328521	-0.173561	0.126985	0.252325	0.286565	0.00380438	0.314251	0.216658	0.209157	-0.160972	0.158116	0.0982418	-0.0175338	0.102682	-0.18171	0.217642	-0.0213861	0.448545	0.0758476	-0.101254	-0.115272	-0.145851	-0.198728	-0.469415	-0.120576	-0.070015	0.122328		0.192019	0.359616	0.312499	0.289613	-0.280288	0.318992	-0.188479	-0.231419	0.171197	0.144638	0.360648	0.364812	0.330285	0.361968
Acylcarnitine.18.1	0.404188	0.222334	0.528845	0.498014	0.245317	0.566637	0.57595	0.313495	0.0105971	0.107411	0.465947	0.401968	-0.126841	0.454101	0.483576	0.289037	-0.0239784	0.0794359	0.192679	0.0341314	-0.0173657	-0.0515572	0.142634	0.230699	0.109331	0.13553	0.198236	0.187963	-0.0877048	0.289577	0.0124932	0.117912	0.235512	0.622058	0.192019		0.629631	0.00763276	0.174065	-0.150639	0.170429	0.0232343	-0.0390879	0.107735	0.00838884	0.254761	0.22171	0.183762	0.232307
Acylcarnitine.18.2	0.193735	0.0265587	0.395032	0.467135	0.0419562	0.385167	0.498422	0.495038	-0.244644	0.09997	0.392367	0.428899	-0.101542	0.34099	0.4439	0.448341	-0.266511	0.140174	0.31964	-0.0945575	-0.0129133	0.0613141	0.349643	0.350183	0.20126	0.418722	0.128185	0.298794	0.176058	0.225299	0.00736874	0.281488	0.224854	0.513807	0.359616	0.629631		0.251209	0.353675	-0.265863	0.222394	-0.168617	-0.0618662	0.374965	0.0444044	0.230951	0.320048	0.185023	0.382346
Acylcarnitine.24.0	-0.299154	-0.438476	0.127717	0.165125	-0.39808	0.0954695	0.185023	0.369985	-0.464086	-0.0644704	0.201428	0.18207	0.0782478	0.301218	-0.0409361	0.30429	-0.198272	-0.0119292	0.485929	-0.0059886	0.198764	0.0849805	0.608221	0.399688	0.388407	0.379598	0.108467	0.224722	0.210465	-0.158536	-0.089661	0.174161	0.0705071	0.0511251	0.312499	0.00763276	0.251209		0.483144	-0.164956	0.146271	-0.0746835	-0.238224	0.151983	0.134893	0.170705	0.381194	0.226679	0.467831
Acylcarnitine.26.0	-0.106823	-0.212901	0.138746	0.174845	-0.209613	0.159052	0.142718	0.337378	-0.366877	-0.0757756	0.140042	0.0882448	0.0308311	0.309775	-0.0735914	0.351419	-0.122364	-0.0326793	0.4373	-0.145839	0.113207	-0.030471	0.409541	0.236904	0.461386	0.254605	-0.0557936	0.049517	0.0718992	-0.099802	-0.233063	0.0734833	0.125605	0.152019	0.289613	0.174065	0.353675	0.483144		-0.355968	0.206085	-0.162004	-0.207285	0.227495	-0.0788239	0.0894209	0.330765	0.241728	0.374617
Cer.AS..36.1	-0.14069	-0.0512931	-0.283024	-0.236832	-0.079964	-0.255038	-0.262262	-0.264338	0.249841	0.129541	-0.139262	-0.244308	0.0968497	-0.0108251	-0.16078	-0.207117	0.232967	-0.0990699	-0.161788	0.143714	-0.0570537	0.109151	-0.2358	-0.1155	-0.237348	-0.101962	0.192247	0.0654545	0.0632463	0.266991	0.2809	0.0531413	-0.0478848	-0.101938	-0.280288	-0.150639	-0.265863	-0.164956	-0.355968		-0.152031	0.0917252	0.080348	-0.147039	0.145731	-0.160984	-0.168509	-0.0361836	-0.214461
Cer.AS..42.2	0.233411	0.152787	0.171377	0.146139	0.114647	0.237984	0.174461	0.285677	0.000408041	0.164236	0.141974	0.263498	-0.00124813	0.117816	0.173033	0.147015	-0.00726073	0.0374557	0.0542094	-0.00387639	0.0779238	-0.211977	0.274251	0.0442844	0.323396	0.0756796	0.0529253	0.0613021	-0.00730873	-0.0312511	-0.313399	0.00823282	-0.0812721	0.129253	0.318992	0.170429	0.222394	0.146271	0.206085	-0.152031		-0.0529493	-0.151719	0.23664	0.273027	0.493261	0.366541	0.314731	0.310459
Cer.EODS..51.0	-0.0746715	-0.0905731	6.0006e-05	0.0176658	-0.170825	-0.0029763	0.0156496	-0.0406721	-0.00816082	-0.0371557	-0.10027	0.00123612	0.0342394	-0.248209	-0.0230063	-0.0787159	0.0413681	-0.166061	0.0987699	-0.12294	-0.203012	0.146019	-0.0850285	-0.0367717	0.0271707	-0.0708431	0.00316832	-0.0581218	-0.0578938	0.0494569	0.0864326	-0.11502	0.159832	0.0446205	-0.188479	0.0232343	-0.168617	-0.0746835	-0.162004	0.0917252	-0.0529493		0.0548455	-0.108899	-0.0831203	-0.130513	-0.115296	-0.130537	-0.130837
Cer.EODS..53.0	0.0712991	0.155668	-0.110063	-0.0873087	0.135674	-0.12216	-0.10225	-0.151287	0.0694869	-0.020162	-0.0933093	-0.136658	0.180246	-0.205245	0.030483	-0.0123972	0.0417642	-0.109379	-0.0947615	-0.172001	-0.138746	0.200228	-0.231431	-0.00352835	-0.29979	0.0427483	-0.117324	0.0491089	-0.0778998	0.0915692	0.282376	0.030399	0.103786	-0.125389	-0.231419	-0.0390879	-0.0618662	-0.238224	-0.207285	0.080348	-0.151719	0.0548455		-0.182334	0.0594539	-0.209529	-0.310603	-0.366577	-0.308851
Cer.EODS..58.0	0.153495	0.0957576	0.20342	0.250801	0.116844	0.244332	0.225503	0.321008	-0.0244704	0.163108	0.30177	0.294353	-0.0406961	0.165125	0.233891	0.167801	-0.080408	0.110459	0.070327	0.0435884	0.159604	-0.0458806	0.186043	0.250441	0.254221	0.328773	0.0709751	0.205473	0.278716	-0.0160936	-0.0810801	0.229523	0.060258	0.172481	0.171197	0.107735	0.374965	0.151983	0.227495	-0.147039	0.23664	-0.108899	-0.182334		0.11598	0.299214	0.378566	0.368869	0.463438
Cer.NDS..34.0	0.160024	0.137042	0.112055	0.155704	0.150639	0.149871	0.0341434	0.135698	0.147171	0.193051	0.198992	0.0313711	0.158896	0.344998	0.288989	0.0945935	-0.00444044	0.0983618	0.0689109	0.233927	0.233939	0.0763036	0.262598	0.310471	0.178434	0.392643	0.265119	0.224266	0.194455	0.110891	-0.0508371	0.170585	0.0827723	-0.0229703	0.144638	0.00838884	0.0444044	0.134893	-0.0788239	0.145731	0.273027	-0.0831203	0.0594539	0.11598		0.451365	0.488053	0.382562	0.429919
Cer.NDS..36.0	0.32198	0.133861	0.350195	0.311671	0.168101	0.427135	0.29625	0.447789	0.115836	0.18255	0.455506	0.390843	0.0373117	0.390543	0.356856	0.192223	-0.00262826	0.0818002	0.0674707	0.133297	0.123576	-0.220282	0.29805	0.176346	0.283156	0.193987	0.233291	0.0941254	0.0972817	-0.0677108	-0.308083	0.130069	0.118908	0.170717	0.360648	0.254761	0.230951	0.170705	0.0894209	-0.160984	0.493261	-0.130513	-0.209529	0.299214	0.451365		0.752379	0.624626	0.687705
Cer.NDS..40.0	0.205617	0.0030363	0.39814	0.396676	0.0336874	0.445761	0.31694	0.513687	-0.0758116	0.234143	0.504914	0.305995	0.0623462	0.53559	0.355344	0.259754	-0.0917612	0.0636544	0.256586	0.192319	0.134545	-0.0906211	0.430087	0.3185	0.388107	0.333069	0.19604	0.189739	0.228659	-0.0482448	-0.249349	0.193063	0.108131	0.198836	0.364812	0.22171	0.320048	0.381194	0.330765	-0.168509	0.366541	-0.115296	-0.310603	0.378566	0.488053	0.752379		0.756856	0.908659
Cer.NDS..41.0	0.20216	0.0712511	0.278788	0.286901	0.0884848	0.300474	0.18267	0.338122	0.113987	0.0868167	0.342742	0.214317	0.030159	0.452193	0.185395	0.164224	-0.0020042	0.119664	0.0306511	0.233015	0.0922772	-0.0568617	0.221518	0.188863	0.389127	0.251641	0.22375	0.153843	0.256166	-0.0436844	-0.28246	0.198044	-0.0558296	0.249673	0.330285	0.183762	0.185023	0.226679	0.241728	-0.0361836	0.314731	-0.130537	-0.366577	0.368869	0.382562	0.624626	0.756856		0.755656
Cer.NDS..42.0	0.131413	-0.0861686	0.409205	0.440744	-0.0363876	0.442436	0.367045	0.572349	-0.106007	0.143018	0.547231	0.332745	0.0934173	0.518056	0.32432	0.331161	-0.150627	0.0834683	0.34255	0.17967	0.173381	-0.0644104	0.533981	0.38075	0.398968	0.399784	0.201392	0.230435	0.242472	-0.0161896	-0.199568	0.255074	0.130009	0.244716	0.361968	0.232307	0.382346	0.467831	0.374617	-0.214461	0.310459	-0.130837	-0.308851	0.463438	0.429919	0.687705	0.908659	0.755656
Cer.NDS..42.1	-0.0317072	-0.178446	0.250825	0.317228	-0.148707	0.205173	0.23844	0.412757	-0.226415	0.0220942	0.334437	0.212745	0.131161	0.360204	0.13553	0.333693	-0.239304	0.162976	0.323816	0.0892889	0.190435	-0.113003	0.526361	0.288329	0.335926	0.410765	-0.0112211	0.114719	0.221674	-0.108011	-0.269391	0.112763	-0.0159856	0.163144	0.344602	0.00344434	0.316076	0.513267	0.415914	-0.248017	0.116448	-0.161008	-0.305803	0.503438	0.191335	0.266751	0.546295	0.480384	0.673087
Cer.NDS..42.2	0.273099	0.136838	0.361248	0.32234	0.0950255	0.38069	0.290357	0.405293	0.0656826	0.216622	0.391491	0.229235	0.0225623	0.537486	0.285953	0.212481	-0.050201	0.126781	0.07964	0.191935	0.0938614	-0.147135	0.345299	0.26219	0.383918	0.306415	0.205137	0.183894	0.149223	0.0735914	-0.245413	0.165977	0.0340714	0.316124	0.406625	0.296238	0.303882	0.208545	0.260846	-0.111107	0.465563	-0.156916	-0.30489	0.404248	0.376442	0.589055	0.642148	0.672271	0.633543
Cer.NP..34.0	-0.132253	-0.104674	-0.0737834	-0.00330033	-0.12102	-0.0337474	-0.0794719	0.108191	-0.0415122	-0.112499	0.0241104	-0.144422	0.0508131	0.0862646	-0.14009	0.161416	0.0823402	0.103966	0.128221	-0.165401	-0.0859526	0.0938614	0.181794	0.239076	0.162208	0.204656	0.0722592	0.193051	0.162556	0.0245545	0.0694029	0.291557	0.0740714	0.0631383	-0.0537054	-0.039532	-0.0233543	0.133033	0.185647	-0.0463246	0.00650465	0.0338314	-0.12168	-0.0390159	0.226259	0.13913	0.212181	0.179694	0.219634
Cer.NP..42.0	-0.211761	-0.300534	0.154083	0.187063	-0.266007	0.12486	0.168029	0.401032	-0.293369	-0.079652	0.174425	0.11862	0.118548	0.317324	0.0590459	0.261254	-0.0557936	0.115224	0.348839	-0.0331713	0.0840804	0.122364	0.471767	0.324176	0.404632	0.463666	0.0882448	0.229619	0.243	0.0170777	-0.0310351	0.268299	0.133969	0.14309	0.234635	0.0288149	0.22267	0.444764	0.416766	-0.196232	0.129157	-0.0609421	-0.19688	0.385695	0.203024	0.206853	0.425827	0.415914	0.553615
Cer.NP..42.1	-0.12432	-0.0356436	-0.110831	-0.0586379	-0.0146295	-0.125737	-0.0930933	-0.200648	0.0939934	0.101938	-0.220594	-0.164044	0.0494929	-0.155296	-0.0155056	-0.0613021	0.180018	-0.0524812	-0.080324	-0.161656	-0.273375	0.385779	-0.166565	0.144098	-0.292157	0.106679	-0.0205461	0.271659	0.142754	0.289229	0.560648	0.27868	0.221422	-0.0288389	-0.398176	-0.0290909	-0.0356796	-0.22213	-0.240876	0.234623	-0.186079	0.168173	0.305671	-0.110531	-0.00280828	-0.369697	-0.297162	-0.295074	-0.277156
Cer.NS..32.1	-0.141602	-0.207093	0.00484848	-0.0161416	-0.195824	-0.010357	0.0287789	0.333909	-0.306139	-0.253705	0.100582	0.0529853	0.0414521	0.0261146	-0.131197	0.182274	-0.0649265	0.170597	0.0981338	0.193603	0.127813	0.0531053	0.310123	0.273327	0.325713	0.293681	0.192883	0.203456	0.410717	0.0311671	-0.00748875	0.269043	0.0375998	0.0773477	0.0625503	-0.0643984	0.0369157	0.30411	0.279784	-0.136694	0.188431	0.0715152	-0.23994	0.205641	0.115104	0.265719	0.361068	0.394851	0.366517
Cer.NS..33.1	0.0189259	-0.00958896	0.040036	-0.0225143	-0.0485569	0.118056	0.0121212	-0.0108851	0.0816442	0.122232	0.159064	-0.0976778	-0.00691269	0.21997	-0.0216622	-0.119664	0.114659	-0.0584098	-0.0519172	0.151899	0.107711	-0.15724	0.00417642	-0.0871647	0.110339	0.0131893	0.11544	-0.0118452	0.131245	0.0545335	-0.121596	0.0488329	0.00849685	0.0267147	0.102238	0.009961	-0.127717	0.0424482	0.0625383	0.248821	-0.0991179	0.164668	-0.177138	0.0227423	0.166757	0.14267	0.245713	0.248461	0.216082
Cer.NS..34.1	0.242772	0.309583	0.0291869	0.0792919	0.308251	0.0872607	0.009949	-0.17667	0.261974	0.219106	-0.00338434	0.00214822	-0.0735314	-0.126073	0.281932	-0.2021	0.172709	-0.0846325	-0.0629103	0.050333	0.0347795	0.0174137	-0.216646	-0.105875	-0.263918	-0.0940174	0.0969817	-0.0819802	-0.175194	0.162352	0.0806721	-0.16486	-0.00352835	-0.0545215	-0.263714	0.123048	-0.0273867	-0.41637	-0.289937	0.298194	-0.156904	0.122292	0.198188	-0.120108	0.173801	-0.188695	-0.21547	-0.228611	-0.257102
Cer.NS..34.2	0.229007	0.126565	0.252973	0.312379	0.154335	0.285137	0.299634	0.325521	-0.0779958	0.217666	0.329205	0.310591	-0.106355	0.121932	0.298998	0.17739	-0.118392	0.0589499	0.116688	0.221398	0.192979	-0.0258386	0.339118	0.345467	0.304014	0.370225	0.284476	0.301998	0.33799	0.228791	0.0628263	0.250465	0.174941	0.161764	0.120456	0.291449	0.305851	0.106895	0.215926	-0.106439	0.344806	-0.00877288	-0.160648	0.297546	0.185731	0.283252	0.334857	0.262118	0.319484
Cer.NS..35.1	-0.0469487	-0.0454005	-0.00811281	-0.060282	0.000552055	-0.0321032	-0.102046	-0.0030363	-0.188119	0.0286589	-0.140726	-0.0177618	-0.0144975	-0.0569817	-0.135001	-0.103846	0.00140414	0.0322232	-0.010117	-0.0634623	-0.00246025	-0.149595	0.0484248	-0.127873	0.0726673	-0.0652985	-0.358512	-0.116484	-0.00984098	-0.205821	-0.187915	-0.108983	-0.111227	-0.0388839	0.10003	-0.173021	0.0137414	0.0552055	0.18219	-0.196568	0.0506811	-0.142382	-0.155692	0.0476808	-0.271287	-0.207549	0.0232223	-0.0030483	-0.0443324
Cer.NS..36.1	0.328833	0.24132	0.172325	0.0838524	0.213681	0.236628	0.108251	0.163972	0.255182	0.159004	0.244716	0.182286	-0.0575098	0.280384	0.213441	0.0144614	0.0712511	0.0519292	-0.177786	0.137294	0.0787879	-0.2812	0.0481368	0.020438	0.166757	-0.0226823	0.159976	-0.0249385	0.0090249	-0.0178338	-0.310723	0.00494449	-0.0231743	0.194971	0.340618	0.166793	0.0437324	-0.070471	-0.00327633	-0.0228983	0.496034	-0.156868	-0.259082	0.168581	0.302514	0.729961	0.466571	0.498698	0.368773
Cer.NS..36.2	-0.126841	-0.049577	-0.141278	-0.0666067	-0.0211221	-0.170177	-0.151467	-0.220858	0.030399	0.050249	-0.2033	-0.15508	-0.0172937	-0.30459	-0.0777798	-0.19772	0.125413	0.00577258	-0.231671	-0.261686	-0.234755	0.401224	-0.332841	0.167969	-0.301494	-0.108695	0.00684068	0.275884	0.143054	0.123456	0.552655	0.261722	0.210417	-0.0834443	-0.370357	-0.0785959	-0.158536	-0.312391	-0.288497	0.154647	-0.158596	0.0553015	0.263534	-0.0485329	-0.137042	-0.248833	-0.308911	-0.276652	-0.339562
Cer.NS..37.1	-0.101002	-0.0126493	-0.331005	-0.374029	-0.0827243	-0.291161	-0.281632	-0.298878	0.212289	0.00175217	-0.196712	-0.280504	-0.134341	-0.0748515	-0.212277	-0.265911	0.0812241	-0.0330033	-0.288293	0.181158	0.0514131	0.0184218	-0.212565	-0.284596	-0.0406121	-0.24012	0.153375	-0.134485	-0.109835	0.159688	-0.0246985	-0.0934293	-0.190135	0.069499	0.030147	-0.0583978	-0.258014	-0.192883	-0.293729	0.267663	0.149235	0.06045	-0.110951	-0.127189	0.0773717	0.122892	-0.0871887	0.089769	-0.146439
Cer.NS..38.1	0.305947	0.125989	0.39736	0.355392	0.141806	0.412577	0.36474	0.539226	-0.0752475	0.121092	0.451101	0.335218	0.0929493	0.489997	0.293693	0.294125	-0.176718	0.243672	0.162832	0.217822	0.24132	-0.185443	0.490033	0.328929	0.448689	0.401044	0.187327	0.168641	0.2755	-0.0320672	-0.337414	0.180534	0.103966	0.214989	0.486829	0.199364	0.380726	0.336874	0.371773	-0.306091	0.460678	-0.251401	-0.350459	0.434347	0.37583	0.660846	0.693969	0.627099	0.705743
Cer.NS..38.2	0.201356	0.0376838	0.392271	0.355596	0.0794959	0.406973	0.372013	0.578002	-0.126073	0.114707	0.398476	0.398836	0.0773837	0.378974	0.283288	0.175818	-0.178098	0.204764	0.153651	0.123528	0.100714	-0.111179	0.394623	0.291761	0.394587	0.379886	0.129673	0.226835	0.305479	-0.0418482	-0.214065	0.225671	0.147639	0.280168	0.490165	0.206421	0.488521	0.249289	0.282604	-0.25733	0.37727	-0.234635	-0.317768	0.432499	0.201584	0.584974	0.617546	0.509571	0.583318
Cer.NS..39.1	-0.280348	-0.215338	-0.186511	-0.0890249	-0.20096	-0.258218	-0.231443	-0.229403	-0.0935614	-0.099982	-0.192559	-0.318908	0.0579778	-0.158404	-0.254473	-0.14345	0.0255386	-0.0280228	-0.0353795	-0.171329	-0.221242	0.596772	-0.155116	0.234035	-0.166889	0.0667147	0.0455806	0.204872	0.176682	0.114707	0.562712	0.234575	0.237744	-0.0352235	-0.380546	-0.0690189	-0.109271	-0.0954695	-0.101674	0.24246	-0.328425	0.190627	0.217954	-0.010369	-0.0520252	-0.321764	-0.175302	-0.0993339	-0.166373
Cer.NS..40.1	0.259622	0.0984938	0.382358	0.353531	0.111431	0.393939	0.323576	0.521392	-0.0808881	0.175446	0.451617	0.359352	0.145587	0.499682	0.310711	0.309355	-0.127201	0.187279	0.213429	0.167153	0.213477	-0.22465	0.516196	0.235428	0.426931	0.435668	0.0517732	0.0982898	0.241308	-0.11592	-0.402928	0.109163	0.0457726	0.203336	0.47748	0.144206	0.392823	0.404044	0.444596	-0.349439	0.376922	-0.221218	-0.346055	0.50351	0.3233	0.547435	0.699922	0.612109	0.740822
Cer.NS..40.2	0.284536	0.112079	0.409349	0.378902	0.0948455	0.4352	0.377978	0.556856	-0.109919	0.173705	0.411305	0.355224	0.0359076	0.454413	0.281848	0.277504	-0.169961	0.194875	0.195152	0.15796	0.231971	-0.212577	0.505575	0.282928	0.468863	0.37865	0.112067	0.155032	0.272691	-0.0774557	-0.363264	0.156256	0.0644704	0.266019	0.4827	0.187891	0.415266	0.364704	0.457642	-0.338266	0.432295	-0.187591	-0.393747	0.500078	0.238752	0.533081	0.628239	0.5579	0.634851
Cer.NS..41.1	0.190819	0.0331113	0.339334	0.362256	0.0241704	0.348455	0.290741	0.485797	-0.0879928	0.111599	0.40378	0.303906	0.0965617	0.443324	0.247153	0.308827	-0.152835	0.160708	0.181158	0.117948	0.213309	-0.0572457	0.468803	0.327969	0.452133	0.448725	0.121296	0.146619	0.285485	-0.0585179	-0.3185	0.185959	0.0655986	0.215542	0.483672	0.105311	0.370777	0.389379	0.410537	-0.22231	0.388227	-0.116388	-0.346751	0.519868	0.287705	0.502022	0.623846	0.647501	0.679652
Cer.NS..41.2	0.0751515	-0.0311911	0.215926	0.210969	-0.0406361	0.22303	0.20054	0.423378	-0.131113	0.0575218	0.251197	0.259982	0.0564176	0.269595	0.145455	0.178458	-0.139742	0.224842	0.16282	0.101158	0.140678	-0.0392319	0.470495	0.246637	0.459538	0.358416	0.0967897	0.187903	0.313663	-0.0426643	-0.240588	0.19844	0.0339394	0.220174	0.427027	0.0663066	0.293981	0.408305	0.32096	-0.23874	0.435164	-0.0283588	-0.404152	0.492289	0.249913	0.40078	0.498866	0.533645	0.556064
Cer.NS..41.3	0.0872127	-0.0143534	0.230207	0.245221	-0.0363756	0.262262	0.215182	0.349787	-0.11508	0.163288	0.269691	0.167945	0.150891	0.271095	0.208125	0.181638	-0.15838	0.0315632	0.126661	-0.0283108	0.0680588	-0.113771	0.333477	0.209913	0.295014	0.225071	0.0020162	0.0874407	0.0886409	-0.110303	-0.13703	0.0909451	0.215338	0.0447285	0.308551	0.0470327	0.279484	0.225947	0.218542	-0.216238	0.269595	-0.170981	-0.142514	0.33505	0.206805	0.423126	0.351311	0.147807	0.330297
Cer.NS..42.1	-0.0317072	-0.178446	0.250825	0.317228	-0.148707	0.205173	0.23844	0.412757	-0.226415	0.0220942	0.334437	0.212745	0.131161	0.360204	0.13553	0.333693	-0.239304	0.162976	0.323816	0.0892889	0.190435	-0.113003	0.526361	0.288329	0.335926	0.410765	-0.0112211	0.114719	0.221674	-0.108011	-0.269391	0.112763	-0.0159856	0.163144	0.344602	0.00344434	0.316076	0.513267	0.415914	-0.248017	0.116448	-0.161008	-0.305803	0.503438	0.191335	0.266751	0.546295	0.480384	0.673087
Cer.NS..42.2	0.293897	0.13685	0.392871	0.356616	0.129709	0.438968	0.363888	0.558548	-0.0680228	0.225143	0.487093	0.374449	0.100354	0.48378	0.363684	0.303834	-0.157216	0.178794	0.19604	0.143078	0.245953	-0.204104	0.516676	0.288257	0.443432	0.394743	0.0920132	0.165941	0.229223	-0.0649385	-0.353531	0.171029	0.0557096	0.225119	0.486457	0.2003	0.438932	0.372457	0.376418	-0.341014	0.457822	-0.243024	-0.298914	0.52378	0.336082	0.594551	0.691197	0.545371	0.709595
Cer.NS..42.3	-0.0350555	-0.233555	0.314203	0.322568	-0.220894	0.306163	0.294725	0.455254	-0.39772	0.0412121	0.302622	0.293969	0.0354515	0.197048	0.149859	0.183654	-0.178494	0.0839364	0.385839	-0.0228503	0.182946	-0.13763	0.604032	0.309091	0.493693	0.365449	0.0943534	0.121692	0.167033	-0.0393279	-0.243396	0.0908971	0.135218	0.121368	0.315932	0.183402	0.353687	0.434203	0.503522	-0.372709	0.45661	-0.010477	-0.234071	0.40264	0.200504	0.40168	0.456994	0.305191	0.459526
Cer.NS..42.4	0.0871647	0.0348635	0.229379	0.244632	0.0656226	0.256754	0.267339	0.341266	-0.0466967	0.107075	0.223162	0.23946	0.0229223	0.0885449	0.312451	0.099742	-0.133981	0.106847	0.130405	-0.182706	0.0244104	0.00889289	0.151011	0.245425	0.24366	0.138026	0.0709271	0.149571	0.0224302	-0.00379238	-0.0682268	0.161524	-0.0190699	0.150375	0.31736	0.132433	0.36096	0.0206781	0.0624542	-0.185551	0.236232	-0.0883048	-0.0556616	0.344242	0.222622	0.309115	0.303846	0.121788	0.265791
Cer.NS..43.1	0.146175	0.0616502	0.21535	0.255074	0.0727633	0.262298	0.189643	0.373801	-0.0420882	0.0389919	0.334101	0.235572	0.11664	0.351707	0.213765	0.326817	-0.214245	0.13907	0.130465	0.0664026	0.202568	0.070279	0.399472	0.363732	0.341926	0.390039	0.110027	0.184302	0.302094	-0.0632103	-0.188287	0.269415	0.0550375	0.179994	0.336118	0.105587	0.352727	0.398644	0.38393	-0.257282	0.297582	-0.120888	-0.29967	0.527081	0.336838	0.466343	0.626379	0.609277	0.736598
Cer.NS..43.2	0.113795	0.0176538	0.22393	0.278596	-0.00333633	0.285665	0.199904	0.443252	-0.115644	0.0342634	0.317624	0.253309	0.0706871	0.36324	0.201428	0.214281	-0.146763	0.049685	0.186007	-0.00118812	0.141854	0.0780198	0.413105	0.353879	0.402112	0.326481	0.101134	0.222262	0.284788	-0.0228863	-0.150051	0.294569	0.165557	0.157456	0.370633	0.151503	0.317372	0.345443	0.361548	-0.259034	0.44408	-0.0868287	-0.223618	0.442568	0.36306	0.532049	0.617534	0.523804	0.631755
Cer.NS..44.1	-0.0179298	-0.0355116	0.110183	0.150615	0.0106811	0.185527	0.126049	0.354779	-0.070219	0.108479	0.255398	0.12192	0.0107531	0.228851	0.207345	0.216646	-0.0336034	0.090369	0.198116	-0.111083	0.0343354	0.0112451	0.335074	0.297894	0.365497	0.269139	0.0620822	0.192283	0.166469	0.0169577	-0.141938	0.246181	0.0493249	0.0875968	0.302178	0.201044	0.376178	0.296766	0.314575	-0.213105	0.293369	-0.0154815	-0.214497	0.479352	0.313735	0.460186	0.559268	0.446733	0.590027
DG.30.0	0.190891	0.34099	-0.182982	-0.26357	0.293153	-0.217882	-0.224494	-0.325941	0.383486	3.60036e-05	-0.169337	-0.152979	0.0753195	0.030171	-0.0217822	-0.108719	0.0214101	0.0331233	-0.368797	0.247009	-0.0213381	-0.0830003	-0.352667	-0.259874	-0.185335	-0.0356196	-0.0371317	-0.127837	0.101338	0.0980498	-0.040228	-0.0488809	-0.356352	-0.0170657	-0.106235	-0.277432	-0.236628	-0.339562	-0.190939	0.154515	-0.256622	-0.20396	0.0748755	-0.0163576	0.0159856	-0.208197	-0.22465	0.0225623	-0.206109
DG.30.1	0.0242784	0.0693909	-0.16384	-0.26165	0.0374437	-0.17997	-0.167717	-0.0826403	0.0936454	-0.00673267	-0.0448605	-0.130033	0.0787639	0.172289	-0.119196	0.0175218	-0.0353435	0.0378518	-0.099898	0.426379	0.179178	-0.251881	0.0164656	-0.226643	0.121164	0.0639184	0.0472487	-0.167321	0.102766	0.0623822	-0.306523	-0.0691509	-0.434299	-0.000432043	0.189307	-0.17889	-0.136466	-0.0520372	0.0176658	0.127201	-0.00446445	-0.209121	-0.199208	0.0039844	0.0807801	0.0333153	0.108191	0.266487	0.105239
DG.32.0	0.0906451	-0.0615662	0.167789	0.108575	-0.0876088	0.15778	0.154659	0.303522	-0.14225	0.0305311	0.218338	0.228935	-0.0365917	0.298146	0.0948215	0.151311	-0.1236	0.0991059	0.151395	0.31844	0.227759	-0.476436	0.429379	-0.0635464	0.411689	0.228155	0.0978458	-0.156568	0.0714791	-0.117876	-0.58021	-0.158536	-0.253513	0.106139	0.477972	-0.0531293	0.164632	0.350747	0.319508	-0.257018	0.344962	-0.17733	-0.346487	0.119184	0.201452	0.461878	0.437732	0.423822	0.422526
DG.32.1	0.366325	0.400228	0.0442964	-0.110951	0.350351	0.0737954	0.0367717	0.020006	0.29661	0.060138	0.0733273	0.146403	-0.0259226	0.185311	0.119424	0.0166337	-0.0129853	0.177102	-0.229607	0.394503	0.0928293	-0.546091	-0.0266187	-0.368257	0.0966457	-0.0161176	0.0163816	-0.300534	-0.00434443	-0.079916	-0.595836	-0.239976	-0.4355	0.0345755	0.313687	-0.0811521	-0.0233663	-0.0853525	0.0126133	-0.123744	0.195884	-0.236232	-0.255326	0.0910051	0.07994	0.239388	0.147279	0.289013	0.142778
DG.32.2	0.0762676	0.090441	-0.0381518	-0.0677828	0.0542454	-0.059646	-0.0257426	0.0328833	0.119748	-0.0121932	0.0820882	0.0572817	0.0537414	0.26087	-0.0114611	0.0807321	-0.141638	0.100498	-0.0528533	0.429271	0.148935	-0.31946	0.089625	-0.26111	0.246385	0.143054	-0.0322232	-0.294617	0.0276748	-0.05961	-0.485041	-0.192355	-0.312823	0.0293429	0.317096	-0.132169	0.0050045	0.0432643	0.128749	-0.0250705	-0.000984098	-0.210513	-0.226199	0.136958	0.118104	0.150759	0.179598	0.358728	0.226415
DG.33.0	0.23808	0.205437	0.0954095	0.019538	0.187999	0.128869	0.0580378	0.139586	0.0737474	-0.0175698	0.0770357	0.127597	0.099994	0.213093	0.0793159	0.0893369	-0.11898	0.0326193	-0.0407561	0.257054	0.179526	-0.288401	0.125209	-0.0694149	0.229259	0.189727	0.0381158	-0.050345	0.149031	-0.0691029	-0.408617	0.0115812	-0.244812	0.0965857	0.321416	-0.070111	0.0832883	0.128449	0.148455	-0.223822	0.209013	-0.222802	-0.222502	0.248749	0.209865	0.288641	0.271455	0.42105	0.280816
DG.33.1	0.161584	0.109715	0.0380318	-0.060354	0.0684308	0.0631743	-0.0188419	0.0833123	0.0868527	0.0882328	0.0525893	0.0987819	0.0374437	0.165173	-0.0189619	-0.0346235	0.0973057	0.101626	-0.158488	0.224374	0.0831203	-0.491785	0.0976538	-0.387183	0.384014	-0.0691749	-0.0980018	-0.400312	-0.150795	-0.240684	-0.621938	-0.301374	-0.367585	-0.0370477	0.455158	-0.103354	-0.0493969	0.0453885	0.207369	-0.198896	0.289025	-0.134257	-0.326433	0.13655	0.0281668	0.32426	0.245785	0.358044	0.231623
DG.33.2	0.154347	0.254497	-0.114215	-0.148311	0.204008	-0.0653825	-0.089625	-0.10057	0.162352	0.0206901	-0.00534053	-0.0687309	-0.0447045	0.0510531	0.0314791	0.0380198	-0.0330033	0.0511491	-0.0959376	0.169769	0.120684	-0.169565	-0.0890009	-0.187507	0.226403	0.0746955	0.0020402	-0.114695	0.134665	0.0587339	-0.341326	-0.000732073	-0.17787	-0.0569217	0.16438	-0.0734833	0.0434803	-0.102298	0.0833243	-0.0667987	0.16078	-0.0719712	-0.0971497	0.226091	0.113375	0.10297	0.0763276	0.237972	0.049817
DG.34.0	0.201824	0.12192	0.179898	0.0943414	0.0822562	0.187963	0.15652	0.291593	0.0329793	0.0440444	0.186895	0.259442	0.0484368	0.317936	0.153567	0.229271	-0.140738	0.145347	0.0130093	0.307771	0.148443	-0.330573	0.301122	0.0279388	0.418806	0.304554	0.160324	-0.00247225	0.21775	-0.0937174	-0.485401	0.0493609	-0.228167	0.19928	0.540462	-0.0178578	0.196244	0.27682	0.211929	-0.280828	0.363756	-0.143666	-0.314779	0.278092	0.293969	0.490309	0.496346	0.57637	0.493717
DG.34.2	0.250885	0.226391	0.0933933	0.0527333	0.137102	0.133441	0.132253	0.0706271	0.202148	0.0279148	0.105251	0.147855	-0.069979	0.210381	0.108227	0.0136334	0.0250225	0.110447	-0.0594659	0.236544	0.0525893	-0.548035	0.0020402	-0.358224	0.269259	-0.174893	0.0155416	-0.374341	-0.213609	-0.147483	-0.660618	-0.351071	-0.316736	0.08036	0.376142	0.123036	0.0618302	-0.0176658	0.0805521	0.0392679	0.303726	-0.0493609	-0.363024	0.0893009	0.0958056	0.330321	0.232631	0.407069	0.218098
DG.34.3	0.351707	0.365785	0.151179	0.117528	0.29901	0.197816	0.203504	0.248833	0.154863	0.0442484	0.203504	0.24486	-0.0713351	0.205149	0.21931	0.112235	-0.0826163	0.275104	-0.0612661	0.302034	0.18081	-0.381734	0.0882088	-0.0951215	0.291773	0.194143	0.138434	-0.0250585	0.186319	-0.0681428	-0.487945	0.0213381	-0.222142	0.0758356	0.409877	0.0491809	0.227255	0.00751275	0.100018	-0.122988	0.26411	-0.186619	-0.251545	0.313183	0.152463	0.286565	0.260234	0.377426	0.279592
DG.35.0	-0.274755	-0.231671	-0.136034	-0.030075	-0.190435	-0.194191	-0.0805881	-0.0726793	-0.133033	-0.165257	-0.0658986	-0.16366	0.167093	-0.0590459	-0.0958056	0.0987579	-0.0246505	-0.0321272	0.126397	-0.138206	-0.0561056	0.488989	-0.0585539	0.252433	-0.0919532	0.215986	0.0280948	0.219766	0.209793	0.133477	0.446901	0.255878	0.198032	-0.030219	-0.234611	-0.0419922	0.0183738	0.0178218	-0.0474047	-0.0412001	-0.516592	0.0746595	0.245905	-0.0651305	-0.0989499	-0.340354	-0.164632	-0.0828083	-0.0893489
DG.35.1	0.114407	0.0191419	0.133261	0.0343354	0.0120252	0.152007	0.0685989	0.249709	-0.0928653	-0.0108731	0.150399	0.171665	0.0733273	0.313291	0.0181218	0.120132	-0.126097	0.0512451	0.103018	0.18231	0.184986	-0.284872	0.309763	-0.0180018	0.477312	0.113375	-0.0322712	-0.172793	-0.00913291	-0.221146	-0.544602	-0.090225	-0.173453	0.0537774	0.493969	0.0474167	0.0944494	0.345443	0.40264	-0.353183	0.333309	-0.120228	-0.27832	0.209013	0.169613	0.451053	0.42333	0.417774	0.407357
DG.35.2	-0.198944	-0.0985899	-0.163396	-0.142526	-0.0533933	-0.18039	-0.165329	-0.243444	0.0360156	-0.122064	-0.13661	-0.269595	0.04012	-0.00813681	-0.190819	-0.170681	-0.0191419	-0.143918	-0.0687429	-0.0966817	-0.0826643	0.303786	-0.225515	-0.0209301	-0.132457	-0.19712	-0.103714	0.00855686	0.0310471	-0.108683	0.19814	0.0684308	0.141626	-0.090333	-0.205173	-0.0749955	-0.196136	-0.0560216	0.00818482	0.0530453	-0.269703	-0.0846205	0.00339634	0.0136094	-0.222514	-0.275068	-0.192355	-0.0540414	-0.149427
DG.35.3	0.400456	0.390927	0.175806	0.108059	0.368101	0.193363	0.171101	-0.030291	0.377858	0.12492	0.158128	0.159472	-0.00186019	0.193507	0.214461	0.0983618	0.070399	0.215266	-0.174593	0.104074	-0.150507	-0.351227	-0.171773	-0.228107	0.0655386	-0.103006	-0.0776118	-0.249541	-0.185887	-0.0453765	-0.35646	-0.179394	-0.241968	0.290801	0.233435	0.205041	0.159088	-0.186907	-0.0761476	-0.0845005	0.0556856	-0.0424122	-0.153123	0.149295	-0.0348515	0.174293	0.0913051	0.300306	0.1606
DG.36.0	-0.0475248	-0.135122	0.136574	0.166649	-0.208161	0.123372	0.244644	0.293429	-0.0942694	0.0190339	0.192667	0.190603	0.136874	0.167897	0.0858326	0.18039	-0.049601	-0.119772	0.305179	0.00945695	0.156112	-0.107255	0.360012	0.25871	0.288941	0.2009	0.113987	0.089577	0.118596	0.0390039	-0.0827243	0.149871	0.19706	0.116604	0.0142334	0.0281068	0.0212301	0.333141	0.168641	-0.0528173	0.224602	0.147831	-0.144134	0.192055	0.0855086	0.16366	0.179574	0.0544975	0.236196
DG.36.1	0.231179	0.125641	0.237096	0.131185	0.112271	0.252145	0.1645	0.31766	0.0294269	0.089721	0.206001	0.27814	0.156064	0.354515	0.169025	0.167321	-0.0790999	0.116916	0.0961536	0.190771	0.149631	-0.418746	0.327969	-0.138962	0.447381	0.0828083	-0.0674707	-0.252589	-0.030315	-0.260414	-0.709163	-0.241572	-0.228371	0.0615542	0.555404	-0.0137894	0.104866	0.298458	0.325521	-0.314947	0.448185	-0.164116	-0.352403	0.21781	0.240756	0.556748	0.563864	0.533141	0.502034
DG.36.2	0.33883	0.273951	0.251065	0.12078	0.217318	0.31604	0.21925	0.176898	0.188563	0.0919292	0.186067	0.20492	0.0707471	0.324944	0.180654	0.0124452	-0.0569337	0.152319	-0.0149055	0.103966	0.0766997	-0.509571	0.160252	-0.28174	0.27892	-0.173405	-0.0634983	-0.304554	-0.264902	-0.147603	-0.672883	-0.3179	-0.212421	0.159232	0.4761	0.286313	0.122232	0.113555	0.152979	-0.140246	0.419562	-0.0875608	-0.305623	0.0707711	0.0984938	0.407693	0.311407	0.338038	0.284212
DG.36.3	0.15664	0.0917012	0.204728	0.246085	0.0729913	0.271671	0.260582	0.259442	-0.0270747	0.0712751	0.175926	0.197468	-0.0272187	0.172517	0.156316	0.070483	-0.0614341	0.13649	0.17625	-0.147183	-0.0089529	-0.276964	0.232463	-0.0515692	0.351995	-0.0428203	-0.162676	-0.219958	-0.276988	-0.277276	-0.540798	-0.224302	-0.0347915	0.0911251	0.471587	0.241596	0.280348	0.249661	0.29517	-0.221782	0.404068	-0.0184458	-0.268659	0.168569	0.100474	0.311467	0.326097	0.255302	0.324788
DG.36.4	0.353735	0.403204	0.159232	0.218038	0.376202	0.255638	0.215122	0.0754395	0.278944	0.130165	0.129577	0.170537	-0.0866847	0.0442004	0.307651	0.0189259	-0.00391239	0.124944	-0.0728473	-0.224626	-0.0969577	-0.171149	-0.112163	-0.0552175	0.09973	-0.0775158	-0.13607	-0.13535	-0.225755	-0.178542	-0.354215	-0.14099	-0.0179658	0.070039	0.250813	0.215518	0.270003	-0.0806601	0.0209661	-0.070291	0.278716	-0.0172217	-0.112835	0.235392	0.105131	0.162184	0.141026	0.180222	0.132709
DG.36.5	0.0254185	0.0517132	0.0182538	0.129745	0.0457606	0.0407201	0.0719592	0.049829	0.102754	0.0419682	0.0765797	0.0681188	-0.132841	0.145659	0.00628863	-0.010441	-0.00876088	0.149799	0.0581218	-0.00237624	-0.0132733	-0.125401	0.0541494	-0.00217222	0.238704	0.050009	-0.0228023	-0.0362316	0.040336	-0.109211	-0.260054	-0.00626463	-0.0762916	0.0171377	0.161164	0.0974977	0.168581	0.0709871	0.154635	0.116112	0.127765	-0.0215302	-0.26441	0.241812	0.0868287	0.0464086	0.122724	0.280816	0.162952
DG.37.2	0.160492	0.100234	0.160084	0.070471	0.109331	0.186535	0.148647	0.18489	0.050321	0.0345034	0.212085	0.19922	-0.029607	0.209949	0.107975	0.106991	-0.148059	0.17883	-0.0665107	0.21541	0.104542	-0.369937	0.208653	-0.12114	0.406253	-0.0249265	-0.0492889	-0.260666	-0.110855	-0.294269	-0.548035	-0.269115	-0.27766	0.0221662	0.534269	0.0189379	0.0855566	0.277552	0.182226	-0.296706	0.3224	-0.18021	-0.284548	0.166877	0.152763	0.367057	0.353111	0.376586	0.381506
DG.37.3	-0.0436124	-0.0665227	0.0365437	0.154815	-0.0387039	0.0632583	0.0817282	0.0239544	-0.108083	-0.0328233	0.00310831	0.01961	0.109739	-0.119544	0.00144014	0.0945695	-0.030171	0.060078	0.0975458	-0.248941	0.020438	0.347963	-0.0676028	0.308323	0.0542934	0.107075	-0.00140414	0.177114	0.0527213	0.0429403	0.344098	0.2036	0.335038	-0.0924452	-0.137594	0.0284668	0.0469967	-0.00416442	0.0850405	-0.117384	-0.090381	0.0558296	0.125773	0.0711191	-0.102598	-0.20036	-0.181038	-0.113471	-0.10249
DG.38.0	-0.162808	-0.201068	-0.0387399	-0.0308791	-0.211197	-0.0257786	-0.0361116	0.0752595	-0.272151	-0.0442604	-0.00225623	-0.197996	-0.127405	-0.0825803	-0.169937	-0.0893609	-0.0611821	-0.00686469	0.0834683	0.00982898	0.105383	0.0564056	0.222106	0.242556	0.221614	-0.030099	0.05991	0.128593	0.144314	-0.0920132	0.0670147	0.126769	-0.0221782	-0.130057	0.123912	-0.13823	-0.0656946	0.23652	0.119796	-0.0936574	0.0337714	-0.0265227	-0.117336	0.0136454	-0.0526133	0.0312391	0.0945335	-0.0368797	0.0683948
DG.38.1	0.160156	0.206889	0.000108011	-0.0360636	0.191455	0.0320072	-0.090129	-0.0541134	0.375014	0.0906331	-0.0169097	0.0256586	-0.0884008	0.0664026	0.112127	-0.0634503	-0.00168017	-0.127285	-0.29565	0.0523372	-0.0408401	-0.0249985	-0.079568	-0.0515812	-0.0569697	-0.00255626	0.00460846	0.0416322	0.0405761	0.0431323	-0.0247705	0.0541374	-0.0660306	0.125881	0.0923132	-0.00354035	-0.0255025	-0.120468	-0.179838	-0.0161776	0.199676	-0.0190939	-0.0611341	0.173105	0.182154	0.248317	0.192499	0.338434	0.189607
DG.38.2	0.161704	0.0849445	0.234503	0.225695	0.0755476	0.298626	0.243348	0.346883	-0.0794959	0.152355	0.320264	0.239664	0.180918	0.336502	0.20354	0.266343	-0.199472	0.128329	0.179802	0.106163	0.186739	-0.284428	0.414101	0.0547615	0.470639	0.226511	-0.0477528	-0.040468	0.000456046	-0.196376	-0.515896	-0.0512571	-0.0506331	0.0590699	0.617606	0.171149	0.299706	0.374269	0.266643	-0.279868	0.408101	-0.187747	-0.206985	0.191035	0.270663	0.428011	0.461122	0.366973	0.462982
DG.38.3	0.173165	0.137702	0.142574	0.11922	0.0715752	0.218566	0.194815	0.127009	0.108971	0.079976	0.173753	0.172061	0.00324032	0.295542	0.155932	0.127453	-0.111095	0.121824	0.0872967	0.0580498	0.143126	-0.242244	0.0990699	-0.162628	0.286265	-0.160756	-0.0881848	-0.281188	-0.304698	-0.141962	-0.510471	-0.243324	-0.128401	0.0937774	0.513543	0.226439	0.132373	0.111371	0.145539	-0.159256	0.313771	-0.089577	-0.344938	0.120948	0.107483	0.347867	0.279304	0.320456	0.284032
DG.38.4	0.207009	0.143054	0.123636	0.100306	0.0612421	0.177042	0.257978	0.238008	0.0823642	0.0333633	0.242736	0.277924	-0.090333	0.183822	0.196784	0.19634	-0.106583	0.165245	0.0152415	0.15622	0.0993819	-0.376262	0.0831563	-0.244188	0.262334	-0.103126	0.00975698	-0.153423	-0.125833	-0.010501	-0.43898	-0.174173	-0.168017	0.177342	0.460438	0.257462	0.240492	0.0422202	0.0633663	-0.0887489	0.330813	-0.109067	-0.233987	0.119424	-0.0189259	0.351371	0.203228	0.293141	0.229691
DG.38.5	0.291149	0.239124	0.210021	0.185335	0.200348	0.26417	0.343594	0.396844	0.0532853	0.0290069	0.319808	0.350915	-0.14141	0.177822	0.272163	0.257702	-0.0818002	0.135266	0.106571	0.214053	0.146055	-0.364404	0.172577	-0.029871	0.188695	0.103534	0.101386	0.122868	0.129157	0.111815	-0.286289	0.0621782	-0.114587	0.184986	0.319364	0.257534	0.367333	0.0738914	0.165953	-0.154767	0.349667	-0.172733	-0.138626	0.289421	-0.0165617	0.266643	0.201788	0.200264	0.252037
DG.38.6	0.336838	0.34387	0.162748	0.141122	0.328653	0.228719	0.201932	0.207321	0.236124	0.120516	0.19766	0.214101	-0.135998	0.102406	0.211869	0.0327033	-0.030111	0.126937	-0.117228	0.106391	0.0393759	-0.312451	-0.0417282	-0.00360036	0.0691389	0.0515332	0.103126	0.184746	0.189439	-0.00229223	-0.201476	0.167585	-0.090465	0.124692	0.202676	0.115176	0.214281	-0.120576	-0.00619262	0.0130453	0.294737	-0.187375	-0.0740714	0.346115	0.103186	0.27928	0.188227	0.279616	0.195944
DG.38.7	0.0245065	0.0306991	0.0381878	0.123984	-0.00350435	0.0584458	0.126361	0.291089	-0.0579418	0.0188299	0.069763	0.205485	-0.0412241	0.0870807	0.0646145	0.141602	-0.134293	0.0343474	0.145947	0.15748	0.0812361	-0.193507	0.274635	0.175878	0.217414	0.290429	0.185443	0.307039	0.339706	0.0444164	-0.0939814	0.270279	-0.070087	0.0410081	0.20432	0.0340474	0.257054	0.154647	0.154887	-0.0289229	0.23562	-0.0457246	-0.259106	0.357924	0.148359	0.130861	0.197	0.296358	0.268035
DG.40.3	0.11862	0.0341194	0.169361	0.120768	0.0110171	0.198692	0.238956	0.269343	-0.0655746	0.0485089	0.214677	0.235236	0.155272	0.243684	0.134329	0.254317	-0.132433	0.0958056	0.136238	0.0480768	0.060426	-0.274203	0.227663	-0.0713951	0.346703	0.0670027	-0.12204	-0.188083	-0.090477	-0.242352	-0.456922	-0.16336	-0.0680948	0.00837684	0.537102	0.0457966	0.178374	0.262106	0.169049	-0.284356	0.245149	-0.101014	-0.169361	0.105707	0.0392199	0.357612	0.295866	0.203072	0.307351
DG.40.5	-0.110003	-0.0758236	-0.0877768	-0.0458086	-0.0731353	-0.0954335	0.0280708	0.050093	-0.010129	0.0613501	0.00820882	0.0587339	-0.125893	-0.049793	0.0425203	0.116052	-0.080108	-0.00388839	0.0637504	0.0175218	-0.079904	0.101158	0.0220702	0.06015	-0.0960816	0.030351	0.109199	0.312079	0.160948	0.288737	0.41535	0.297858	0.120576	0.090225	-0.0757516	0.109007	0.131941	-0.0892169	-0.150579	0.210525	-0.0135854	-0.134953	0.107447	-0.0442244	-0.167813	-0.168833	-0.195776	-0.14477	-0.129613
DG.40.6	0.276928	0.168329	0.274227	0.221722	0.143894	0.296142	0.335458	0.444416	-0.019526	0.0581338	0.287753	0.353375	-0.101878	0.23826	0.229787	0.2442	-0.123528	0.183618	0.166193	0.268059	0.209637	-0.331041	0.28366	0.0539574	0.337462	0.176106	0.172169	0.190183	0.19844	0.0315152	-0.291641	0.178398	-0.0912331	0.188167	0.424146	0.187147	0.324824	0.167777	0.173429	-0.129481	0.349043	-0.182562	-0.21613	0.326289	0.0653585	0.333177	0.332565	0.354143	0.363564
DG.40.7	0.0768437	0.180246	-0.0636424	-0.0388239	0.173609	-0.0529013	-0.0261746	-0.0932133	0.218506	-0.0124932	-0.0228023	-0.0060246	-0.167609	-0.136538	0.00808881	-0.16318	0.0439964	0.0739394	-0.11502	-0.0656226	-0.15838	0.162388	-0.263834	-0.00758476	-0.233243	-0.0963336	0.0376958	0.241884	0.13685	0.110711	0.317132	0.230663	0.169157	0.0710231	-0.246697	0.109187	0.00252025	-0.261746	-0.275896	0.193543	-0.0464206	0.0242664	0.146787	0.109535	-0.159388	-0.163612	-0.219346	-0.103402	-0.150651
DG.40.8	0.090321	-0.00327633	0.278044	0.2809	0.00724873	0.279244	0.31562	0.477156	-0.128713	0.161524	0.292841	0.348203	-0.0850045	0.164716	0.168329	0.215074	-0.200468	0.147099	0.231947	0.039832	0.152403	-0.168113	0.355236	0.186523	0.426355	0.200444	0.0481968	0.255698	0.296022	-0.0760756	-0.195368	0.252289	0.0660666	0.089913	0.349991	0.0750315	0.29895	0.221518	0.256238	-0.197732	0.380018	-0.102286	-0.204032	0.397636	-0.00285629	0.308755	0.400396	0.34243	0.430639
GlcCer.NS..34.1	0.171281	0.0315152	0.299562	0.305935	0.0450405	0.301182	0.312883	0.349775	-0.0819202	0.128665	0.420354	0.274539	0.172373	0.41625	0.4042	0.46201	-0.289829	0.0570297	0.195944	0.138758	0.348107	0.0379838	0.428575	0.495986	0.205041	0.490237	0.275404	0.310699	0.190843	0.129829	0.0172337	0.247009	0.118188	0.153459	0.270459	0.126085	0.303342	0.279628	0.193771	-0.138446	0.239472	-0.254965	-0.110579	0.247201	0.3233	0.3197	0.374713	0.249673	0.390795
GlcCer.NS..34.2	-0.170189	-0.145575	-0.111047	0.0039724	-0.118056	-0.114599	-0.090105	-0.145563	-0.122232	-0.0821242	-0.00673267	-0.173417	0.0640144	-0.0936214	-0.0134173	0.0368677	-0.0527333	-0.232067	0.0135254	-0.265155	-0.0368437	0.434503	-0.0791839	0.271359	-0.15856	0.154863	0.00672067	0.208557	0.049985	0.130285	0.455962	0.199724	0.434863	-0.0311791	-0.291617	0.0549775	-0.0256106	-0.0741314	0.0273507	0.141818	-0.143378	0.127633	0.294785	-0.0285989	0.0574617	-0.208545	-0.16186	-0.193171	-0.173165
GlcCer.NS..36.1	-0.194719	-0.115848	-0.130801	-0.0211701	-0.0745395	-0.164776	-0.079556	-0.133873	0.0394479	0.00536454	-0.079784	-0.126337	0.113183	0.00366037	-0.0146775	0.107327	-0.0724032	-0.197672	0.0663666	-0.194791	-0.0273267	0.472751	-0.118632	0.390591	-0.236688	0.235764	0.0918692	0.351275	0.149283	0.249793	0.627795	0.355992	0.268299	0.0679988	-0.337906	-0.0743834	-0.0526973	-0.0164176	-0.149703	0.215038	-0.407741	-0.0275068	0.356784	-0.0693789	0.00978098	-0.284332	-0.218002	-0.199004	-0.152247
GlcCer.NS..38.1	0.444392	0.356892	0.272667	0.233531	0.358068	0.307111	0.227159	0.200132	0.244872	0.18477	0.285113	0.251593	0.1579	0.285293	0.376178	0.0346715	-0.0205701	0.237264	-0.0578338	0.148215	0.175266	-0.200012	0.103426	0.0565497	0.0493609	0.103162	0.113663	0.0474047	0.0491929	0.0280108	-0.204284	0.0385599	-0.0384278	0.205365	0.22009	0.152571	0.185959	-0.185155	-0.0909091	-0.059682	0.17811	-0.314503	-0.00775277	0.12114	0.280804	0.374389	0.208317	0.213777	0.193063
GlcCer.NS..40.1	0.0989859	-0.0714431	0.351407	0.395356	-0.0313471	0.326541	0.379166	0.572517	-0.232043	0.0978818	0.514251	0.353627	0.161548	0.531785	0.332301	0.496622	-0.332277	0.110411	0.354719	0.228563	0.413765	0.108791	0.588491	0.580246	0.358188	0.660354	0.280816	0.434131	0.429295	0.145527	0.00517252	0.402244	0.222214	0.230387	0.338914	0.148431	0.404872	0.453693	0.341554	-0.205857	0.173693	-0.253057	-0.216754	0.361644	0.303906	0.363492	0.554791	0.422562	0.616826
GlcCer.NS..41.1	-0.00529253	-0.0642784	0.050093	0.107795	-0.0710231	0.0190219	0.0557216	0.15574	-0.0945095	-0.0571497	0.159664	0.0886409	0.0807321	0.193459	0.0553855	0.214185	-0.0809721	0.173825	0.0277948	0.119844	0.302082	0.154143	0.238308	0.290813	0.228323	0.364872	0.231935	0.241188	0.298086	0.0878128	0.0435404	0.299214	0.0276988	0.0353315	0.19886	-0.0791359	0.0743234	0.172973	0.0328593	-0.00487249	0.0821242	-0.214605	-0.138146	0.185527	0.127885	0.147471	0.125137	0.23628	0.179982
GlcCer.NS..41.2	0.0244944	-0.106919	0.194539	0.251341	-0.107495	0.227795	0.202916	0.269811	-0.117276	0.0466487	0.270015	0.212757	-0.0222142	0.276856	0.0462046	0.175446	-0.174533	0.00246025	0.179466	0.153003	0.273531	0.161164	0.326745	0.363576	0.172397	0.362796	0.294185	0.365917	0.305731	0.107891	0.129877	0.358008	0.186319	0.103102	0.189775	0.0347795	0.122484	0.209697	0.226847	0.000636064	0.263282	-0.101398	-0.0830963	0.146871	0.194959	0.269283	0.276388	0.289073	0.328269
GlcCer.NS..42.1	-0.0543054	-0.195848	0.244896	0.251521	-0.153519	0.17877	0.291605	0.399532	-0.288557	0.0090009	0.331461	0.260294	0.125629	0.397084	0.235944	0.480348	-0.320828	0.147135	0.288581	0.134269	0.266679	0.080252	0.52072	0.460558	0.268503	0.574953	0.225227	0.382874	0.370813	0.181806	0.0448965	0.372361	0.145767	0.273771	0.350339	0.130285	0.386163	0.4782	0.221494	-0.173789	0.0580738	-0.148647	-0.163012	0.27844	0.218902	0.223714	0.377774	0.289553	0.476964
GlcCer.NS..42.2	0.167489	0.0218182	0.352895	0.341722	0.039592	0.358176	0.349391	0.552331	-0.147051	0.11856	0.502346	0.327249	0.191671	0.553747	0.351455	0.417498	-0.349451	0.173789	0.283996	0.246025	0.417942	0.069979	0.61547	0.560744	0.402112	0.585899	0.299202	0.414053	0.382214	0.136694	-0.0566457	0.376862	0.15976	0.225599	0.365437	0.176634	0.387615	0.400888	0.298386	-0.230315	0.285677	-0.306607	-0.185467	0.342934	0.34375	0.405737	0.511971	0.398032	0.564392
GlcCer.NS..43.1	-0.148839	-0.263714	0.18021	0.253225	-0.261494	0.110807	0.204752	0.259802	-0.203888	-0.0928533	0.214065	0.134473	0.139946	0.300318	0.0506571	0.360072	-0.20402	0.152139	0.338614	0.0747915	0.29619	0.135314	0.423594	0.393375	0.329841	0.426451	0.234263	0.212193	0.359796	0.154131	-0.00182418	0.227171	0.0243624	0.133093	0.146907	-0.0520972	0.152835	0.358464	0.258062	-0.0425563	-0.117636	-0.0856046	-0.142502	0.149139	0.252601	0.0664506	0.241596	0.287513	0.326733
LysoPC.14.0	-0.0955176	-0.215722	0.125461	0.142226	-0.183246	0.109019	0.185335	0.4421	-0.316676	-0.0461206	0.207225	0.277756	0.148299	0.276856	0.0259826	0.290633	-0.269559	0.0727273	0.408629	0.232691	0.183378	-0.104122	0.4815	0.221806	0.425251	0.441344	0.140042	0.102958	0.293681	-0.150291	-0.274095	0.16204	0.0440564	0.0150855	0.379154	-0.0562376	0.317828	0.513063	0.366157	-0.222226	0.146403	-0.142658	-0.313063	0.225335	0.111911	0.295674	0.425971	0.28132	0.440528
LysoPC.15.0	-0.138602	-0.250957	-0.00884488	0.0589979	-0.23604	0.00535254	0.0218782	0.32336	-0.272091	-0.0548215	0.17517	0.118812	0.156208	0.237948	-0.121236	0.22201	-0.108527	-0.0385719	0.338014	0.114311	0.229031	0.0431803	0.37691	0.186031	0.358956	0.284512	0.0230663	0.0906571	0.266811	-0.172493	-0.178722	0.21703	0.0762556	0.0120372	0.312919	-0.111335	0.210369	0.412325	0.384794	-0.142298	0.172601	-0.147603	-0.195356	0.25793	0.130057	0.247405	0.335434	0.280348	0.379322
LysoPC.16.0	0.126733	-0.0766877	0.347231	0.381554	-0.0475008	0.367945	0.421494	0.671575	-0.321092	0.0337114	0.466151	0.433459	0.0231263	0.345611	0.223102	0.355284	-0.22093	0.192679	0.339754	0.20432	0.216406	-0.197408	0.600048	0.340078	0.496178	0.518512	0.15532	0.230195	0.291305	-0.122328	-0.302358	0.250453	0.0947255	0.180558	0.541554	0.161512	0.540138	0.528641	0.37787	-0.323876	0.35712	-0.153867	-0.303606	0.409685	0.216646	0.497978	0.585827	0.408017	0.641164
LysoPC.16.1	-0.183426	-0.345863	0.160648	0.208749	-0.272439	0.15742	0.216442	0.497282	-0.448533	-0.104854	0.299622	0.25511	0.0809361	0.244188	-0.0226943	0.267771	-0.248905	-0.019898	0.494629	0.109703	0.193027	-0.0910051	0.576682	0.307831	0.445317	0.328533	0.0413321	0.0964056	0.192343	-0.2427	-0.249085	0.139634	0.129001	0.0341554	0.375578	0.0778638	0.386847	0.600192	0.43952	-0.294953	0.217942	-0.0974137	-0.29631	0.265215	0.109835	0.373261	0.479088	0.267939	0.528929
LysoPC.17.1	-0.286925	-0.27748	-0.0783798	0.0909571	-0.247981	-0.102538	0.0308551	0.0787399	-0.385479	-0.129421	0.0311071	-0.0993699	0.0551215	-0.0856166	-0.100018	0.191623	-0.224038	-0.204992	0.27964	-0.23574	0.0867087	0.61877	0.0845365	0.458074	-0.0174737	0.262214	-0.0116892	0.326925	0.198704	0.0640264	0.510687	0.409649	0.348107	0.0192739	-0.124104	0.0431083	0.218794	0.143354	0.17613	-0.0917132	-0.249913	0.0813081	0.25775	0.0410561	-0.0470927	-0.286073	-0.113183	-0.210537	-0.0359196
LysoPC.18.0	-0.0947375	-0.302958	0.190807	0.308671	-0.267963	0.18375	0.336706	0.573285	-0.457942	-0.0483408	0.457354	0.239268	0.0211461	0.412193	0.139838	0.411629	-0.138182	0.0817042	0.389475	0.165737	0.159724	0.0835644	0.549943	0.433975	0.499778	0.469715	0.179874	0.211185	0.168437	0.0288749	-0.0829403	0.24486	0.149103	0.251473	0.372397	0.270387	0.474395	0.494581	0.454905	-0.188875	0.185647	-0.0564536	-0.264086	0.252397	0.211521	0.369217	0.543198	0.403096	0.559064
LysoPC.18.1	-0.00708071	-0.166841	0.247477	0.320576	-0.117804	0.271299	0.339574	0.59922	-0.372373	-0.00807681	0.416466	0.324236	0.0551215	0.386475	0.128797	0.357444	-0.20396	0.148539	0.388275	0.162556	0.193819	-0.0526373	0.641212	0.413297	0.480384	0.564524	0.0977138	0.233171	0.283144	-0.070351	-0.192019	0.286625	0.143474	0.139814	0.474035	0.165113	0.510243	0.592187	0.489625	-0.297246	0.219934	-0.195716	-0.224374	0.329421	0.246481	0.355584	0.53847	0.34159	0.605725
LysoPC.18.2	-0.106463	-0.136634	-0.00664866	0.105863	-0.0711551	0.0225863	0.020174	0.177294	-0.134017	-0.0826523	0.153747	0.0539574	0.119808	0.302334	-0.0636904	0.177414	-0.0858686	-0.11592	0.254641	0.0146895	-0.00230423	0.129445	0.271587	0.337186	0.170933	0.322292	-0.00765677	0.12372	0.169865	-0.13763	-0.0889529	0.268875	0.146343	0.0656946	0.207249	0.08042	0.242484	0.334089	0.279916	-0.0331113	-0.00516052	-0.0863726	-0.148815	0.166673	0.280408	0.218566	0.375001	0.335158	0.387039
LysoPC.18.3	-0.020114	-0.00978098	0.0137774	0.0291749	0.0731113	0.0335434	0.0259106	0.0874287	-0.0394119	-0.00609661	0.156028	0.0409721	0.124032	0.315704	0.0332073	0.0470207	-0.0412961	0.0605101	0.13871	0.187675	0.0924332	-0.0548455	0.110879	0.0689349	0.211173	0.263174	0.00152415	-0.0209181	0.188587	-0.11712	-0.248017	0.0625983	0.0872247	-0.0462286	0.242964	0.0450885	0.207921	0.160768	0.174089	0.010081	-0.0453165	-0.250225	-0.127129	0.168473	0.223726	0.114863	0.211149	0.205545	0.2024
LysoPC.19.0	-0.454017	-0.5603	-0.059562	0.0792799	-0.478164	-0.113771	0.00446445	0.292289	-0.566097	-0.225551	0.122508	0.0342274	0.0622502	0.136538	-0.232883	0.249745	-0.250453	0.0707831	0.556196	0.0278188	0.240864	0.136346	0.579382	0.331773	0.428383	0.318656	-0.0368797	0.129409	0.212973	-0.059658	-0.0409961	0.169961	0.102274	0.0267987	0.219142	-0.0506571	0.230723	0.566829	0.54147	-0.223546	-0.00235223	-0.113699	-0.129121	0.165785	0.0882208	0.0131773	0.208101	0.089853	0.331701
LysoPC.19.1	-0.0541134	-0.210369	0.15658	0.242604	-0.166589	0.144242	0.233735	0.452889	-0.396616	0.069703	0.384746	0.180066	0.0357756	0.246517	0.127201	0.319052	-0.15892	0.01967	0.313123	0.205737	0.206721	0.0748035	0.453213	0.384014	0.49583	0.44246	0.0708791	0.162112	0.159952	0.0170417	-0.0656106	0.204728	0.0946775	0.0730753	0.400384	0.129265	0.311527	0.363576	0.369781	-0.293081	0.157096	-0.0161056	-0.107015	0.232475	0.204164	0.274275	0.455146	0.28324	0.448665
LysoPC.20.0	0.134653	0.0464086	0.309175	0.389439	0.0889289	0.330909	0.424494	0.562508	-0.255686	0.0632103	0.483492	0.385815	0.0745995	0.40198	0.317324	0.476004	-0.181314	0.193615	0.343414	0.0424602	0.214137	0.0953975	0.457678	0.467891	0.34453	0.622178	0.155992	0.356328	0.318008	0.155752	0.00742874	0.372985	0.230147	0.218422	0.350555	0.295878	0.610909	0.347543	0.367261	-0.277852	0.104878	-0.163396	-0.0459646	0.414845	0.225935	0.232199	0.410549	0.185083	0.474467
LysoPC.20.1	-0.152919	-0.335086	0.221518	0.377378	-0.254233	0.245617	0.352667	0.542658	-0.50129	-0.00884488	0.452313	0.189415	0.0754275	0.350159	0.131917	0.391167	-0.181938	0.0572337	0.512799	-0.0162736	0.158272	0.148119	0.566841	0.488041	0.375554	0.424242	0.0558176	0.198296	0.0937774	-0.0182778	-0.0484368	0.212589	0.255566	0.119856	0.346967	0.298626	0.513327	0.534893	0.491641	-0.280432	0.152511	-0.0953855	-0.140474	0.242436	0.202352	0.292553	0.466271	0.214329	0.535722
LysoPC.20.2	-0.0162016	-0.106943	0.146367	0.297654	-0.0638344	0.181386	0.314575	0.343234	-0.214593	0.0375038	0.35814	0.261362	0.0560816	0.278068	0.250537	0.356052	-0.0972577	0.172037	0.243252	0.050357	0.166985	0.219562	0.252721	0.329673	0.354599	0.279076	0.090117	0.101338	-0.0118812	0.0361476	0.00606061	0.130597	0.0833723	0.231323	0.385839	0.3173	0.438212	0.173093	0.181998	-0.149499	0.0643624	-0.0371437	-0.170345	0.276988	0.127645	0.219754	0.309307	0.241164	0.359664
LysoPC.20.3	0.264302	0.090177	0.281824	0.267987	0.103102	0.312691	0.335506	0.55532	-0.133225	0.0969697	0.41787	0.43682	-0.0963816	0.34171	0.20072	0.279568	-0.0749475	0.13799	0.186979	0.352835	0.255446	-0.226067	0.46087	0.200936	0.37949	0.434515	0.272919	0.182802	0.31604	-0.0538014	-0.306751	0.223702	0.00117612	0.185887	0.466823	0.145743	0.38459	0.370429	0.287561	-0.268515	0.26483	-0.145887	-0.316772	0.310327	0.188443	0.498266	0.512379	0.413789	0.521224
LysoPC.20.4	0.133057	-0.0363516	0.315848	0.341974	-0.0123852	0.331005	0.368509	0.728077	-0.219958	0.0514011	0.391587	0.430039	-0.030027	0.311287	0.19778	0.319952	-0.14123	0.0939334	0.343294	0.187855	0.164428	-0.0483768	0.561392	0.359532	0.36348	0.514431	0.28024	0.499106	0.503438	0.114947	-0.0351515	0.479064	0.234143	0.21757	0.346511	0.159928	0.519772	0.408233	0.284536	-0.181398	0.349751	-0.147591	-0.230915	0.353903	0.177762	0.440216	0.497318	0.390879	0.54195
LysoPC.20.5	-0.13667	-0.170477	-0.00312031	0.101974	-0.0950495	0.0211101	0.0415362	0.182862	-0.204572	-0.117504	0.16	0.0576658	0.109043	0.271407	-0.0746115	0.185467	-0.104806	-0.0875488	0.248881	0.0427723	0.0478848	0.0910411	0.28372	0.313903	0.194719	0.282796	-0.0453285	0.0832043	0.15898	-0.198236	-0.130189	0.226871	0.149751	0.009973	0.237912	0.0621302	0.215986	0.332781	0.268311	-0.0869847	-0.00486049	-0.089889	-0.180162	0.135566	0.252949	0.183006	0.356064	0.319592	0.369289
LysoPC.22.0	-0.0670267	-0.12492	0.120804	0.17685	-0.105815	0.127081	0.213861	0.341902	-0.355572	0.0145215	0.297006	0.197696	0.0639064	0.265443	0.0964776	0.269655	-0.0983858	0.1603	0.288017	0.0388959	0.206649	0.181926	0.327957	0.462394	0.232211	0.459826	0.140438	0.337534	0.350423	-0.0187099	0.0847885	0.385755	0.18093	0.0634143	0.132289	0.1191	0.301014	0.456154	0.309259	-0.121212	0.000324032	-0.0224182	0.0634263	0.275476	0.17673	0.0793999	0.329637	0.122844	0.366025
LysoPC.22.4	0.0232823	-0.181266	0.266355	0.307507	-0.121524	0.255194	0.359652	0.641416	-0.321584	0.0928413	0.46231	0.387963	0.0425083	0.390027	0.215446	0.2773	-0.103882	0.0357396	0.311815	0.254581	0.249385	-0.00752475	0.501374	0.367237	0.292337	0.464134	0.284848	0.355728	0.317432	0.141158	0.0631143	0.319688	0.180426	0.182886	0.301554	0.0780918	0.315008	0.399808	0.251449	-0.0931173	0.0631623	-0.171473	-0.159136	0.18033	0.153111	0.356016	0.49703	0.27652	0.473543
LysoPC.22.5	-0.14027	-0.372157	0.219958	0.292697	-0.340654	0.173945	0.320408	0.620066	-0.416274	-0.0650945	0.362256	0.315272	0.0449565	0.289985	0.0819322	0.36078	-0.236184	-0.0294149	0.479868	0.273219	0.26369	0.0572937	0.683672	0.409169	0.361572	0.536634	0.321476	0.37613	0.385947	0.21931	0.0956736	0.389655	0.177126	0.230387	0.253357	0.090033	0.366709	0.487177	0.31616	-0.201716	0.0530573	0.00069607	-0.194491	0.166409	0.102562	0.288365	0.389595	0.223558	0.467975
LysoPC.22.6	0.000756076	-0.0505851	-0.0415722	-0.0177378	-0.029631	0.019814	0.0328113	0.308887	-0.00582058	0.132817	0.114707	0.0685989	-0.049685	0.213057	-0.020258	0.0147015	0.0374797	0.0390879	0.102346	0.250405	0.169853	-0.000816082	0.289673	0.259094	0.223714	0.248065	0.335098	0.3639	0.346655	0.187075	0.0608821	0.492985	0.0924572	0.167069	0.189775	0.0617222	0.150339	0.13655	0.0666187	0.124092	0.131857	-0.089661	-0.29751	0.158896	0.212793	0.3161	0.268635	0.296658	0.306523
LysoPC.24.0	-0.264446	-0.404536	0.149115	0.261014	-0.364704	0.0716352	0.231755	0.447585	-0.453705	-0.0729313	0.334485	0.200972	0.0941014	0.387423	0.0513891	0.451437	-0.331809	0.0877528	0.570009	0.14177	0.272967	0.20276	0.642076	0.550147	0.361728	0.633315	0.191491	0.419106	0.454605	0.162844	0.164428	0.434263	0.229967	0.229787	0.116112	0.127177	0.419946	0.584578	0.420666	-0.210033	-0.0830123	-0.0824962	-0.0765437	0.152295	0.16042	0.0591059	0.338746	0.146739	0.4424
LysoPC.24.1	0.0291149	-0.039772	0.247945	0.288905	-0.0163696	0.207609	0.315356	0.444428	-0.206985	0.0079808	0.390423	0.304806	0.125053	0.421086	0.193135	0.466619	-0.31694	0.188731	0.342754	0.158488	0.164512	0.174617	0.487801	0.49667	0.229043	0.653777	0.219982	0.41529	0.407993	0.166097	0.123276	0.412793	0.183534	0.174929	0.263558	0.192907	0.49517	0.45967	0.28078	-0.32402	0.00187219	-0.166385	-0.0377798	0.222826	0.158548	0.119736	0.321764	0.187099	0.407729
LysoPE.16.0	0.0766877	-0.0742154	0.182718	0.222694	-0.059826	0.203096	0.209805	0.454977	-0.270231	-0.0470927	0.275464	0.27982	0.08006	0.28222	0.0560216	0.334245	-0.278872	0.122688	0.310519	0.222142	0.251377	-0.21571	0.552643	0.277744	0.491665	0.429451	0.079772	0.0953495	0.239904	-0.199736	-0.404908	0.137666	0.0149775	0.099862	0.487633	0.0670987	0.399448	0.459802	0.41607	-0.351707	0.380306	-0.149811	-0.295854	0.280552	0.268959	0.480192	0.51682	0.38057	0.554503
LysoPE.17.0	-0.0662586	0.0285149	-0.104938	-0.105683	0.0333273	-0.0945215	-0.134077	-0.177618	0.0322832	-0.099802	-0.197924	-0.171845	0.0874767	-0.0384398	-0.202244	-0.120876	-0.00740474	-0.0283948	-0.00186019	-0.0623582	-0.142202	0.256094	-0.201512	0.0128173	-0.177918	-0.0335794	-0.12084	0.0475848	-0.029883	0.0151095	0.253849	0.0207741	0.231743	-0.0647585	-0.270831	-0.0466367	-0.128977	-0.133813	-0.0566817	0.030075	-0.218242	0.0822922	0.171917	-0.261194	-0.170885	-0.372481	-0.34063	-0.360636	-0.370849
LysoPE.18.0	-0.0649985	-0.250837	0.171569	0.254509	-0.194779	0.188083	0.213381	0.443924	-0.385503	-0.0915452	0.313639	0.227495	0.146379	0.291821	0.0779118	0.304266	-0.204608	0.153363	0.397468	0.10207	0.220318	-0.202916	0.511323	0.173093	0.515536	0.213309	-0.116076	-0.0919652	0.0215302	-0.291713	-0.4845	-0.0508011	-0.050225	0.0637984	0.520012	0.0726793	0.355716	0.47754	0.435584	-0.371305	0.348047	-0.115836	-0.337354	0.295026	0.266139	0.508263	0.600072	0.400672	0.620342
LysoPE.18.1	-0.079832	-0.117708	0.0375278	0.110519	-0.110927	0.0291389	0.0237024	0.152235	-0.133369	-0.166601	0.0972457	0.0763636	0.23976	0.335242	-0.0793879	0.209253	-0.130969	0.049793	0.208485	0.0518812	0.130741	0.0221182	0.281104	0.140486	0.302586	0.250501	-0.1191	-0.110771	0.0122532	-0.208509	-0.364584	-0.0325473	-0.0326553	0.0680348	0.37823	0.0471287	0.167993	0.379742	0.376214	-0.168353	0.0870567	-0.0953495	-0.173237	0.0615902	0.298902	0.232043	0.347555	0.384506	0.389091
LysoPE.18.2	0.0538854	0.114863	-0.0428203	0.0286949	0.163444	-0.0228863	-0.0511731	-0.0971737	0.105683	-0.0686709	0.0765677	-0.0259106	0.222502	0.293225	-0.00858086	0.0915092	-0.135218	-0.0944614	0.0236664	0.0964056	0.079724	0.0437924	0.0666307	0.209901	0.0247585	0.204056	-0.0557936	-0.0267987	0.108311	-0.208569	-0.219814	0.0836724	-0.0956136	-0.000936094	0.142478	0.0436844	0.0636784	0.203984	0.144254	0.0105251	-0.0375158	-0.172181	-0.0621422	0.0391119	0.327237	0.130981	0.233279	0.289037	0.222334
LysoPE.20.3	-0.0532733	0.00379238	-0.0682028	-0.0184458	0.0171257	-0.0730153	0.0521092	0.109355	-0.131929	-0.121272	0.0273627	0.099622	-0.0213741	0.0190699	-0.0516292	0.0853045	-0.0654305	0.0326313	0.107291	0.16024	0.00344434	0.174065	0.0807801	0.271215	-0.0654065	0.367189	0.245004	0.270615	0.412409	0.0805881	0.25559	0.343654	0.275164	0.0164536	-0.153867	0.0461086	0.115644	0.0781878	0.0138254	-0.0394599	-0.296454	-0.0480288	0.0629703	0.039832	0.0162256	-0.0530453	-0.0727393	-0.140414	-0.0365557
LysoPE.20.4	0.148059	0.119316	0.147987	0.166469	0.0910051	0.186955	0.274623	0.41805	-0.0852325	-0.0240144	0.17661	0.30135	0.164272	0.15736	0.104794	0.300822	-0.107027	-0.0529493	0.249037	0.0482448	0.139634	-0.0457006	0.326277	0.236268	0.122112	0.342346	0.0535494	0.267615	0.305479	-0.0163456	-0.0357156	0.311311	0.0934293	0.0536094	0.247705	0.0337114	0.288785	0.396196	0.178326	-0.168581	0.176874	-0.146391	-0.0263066	0.217954	0.118884	0.218542	0.179562	0.0917972	0.27772
LysoPE.22.5	0.202256	0.0211461	0.365149	0.380042	-0.00637264	0.342058	0.442196	0.650201	-0.128761	0.0329673	0.407849	0.454449	0.0922172	0.325653	0.254941	0.37745	-0.0822442	0.0120972	0.301386	0.261578	0.188371	-0.153927	0.464674	0.217738	0.239772	0.500282	0.254401	0.276304	0.264674	0.181014	-0.0434443	0.26165	0.156976	0.300894	0.273375	0.183114	0.44336	0.300138	0.251629	-0.190123	0.108395	-0.0850885	-0.0350915	0.238752	0.108659	0.308935	0.292157	0.191107	0.412529
LysoPE.22.6	0.328557	0.333705	0.16252	0.118932	0.270231	0.229031	0.194263	0.208533	0.202448	0.190639	0.138326	0.205605	-0.182766	0.250453	0.0870567	0.0158056	0.00912091	0.119124	-0.0512931	0.165989	0.0693069	-0.125401	0.0815242	0.119892	0.0847285	0.168941	0.285497	0.275752	0.282172	0.119112	-0.114359	0.393771	0.00438044	0.337474	0.264999	0.304122	0.23682	0.000972097	0.0378878	0.0590339	0.306655	-0.128593	-0.24054	0.24366	0.141878	0.29661	0.229979	0.396292	0.226271
PA.32.1	0.386295	0.253357	0.332073	0.225455	0.253789	0.341746	0.382898	0.350147	0.0833723	0.113219	0.400192	0.420198	0.0338314	0.403264	0.277564	0.294029	-0.120504	0.13853	0.040012	0.436808	0.292313	-0.320012	0.248497	0.0151815	0.151683	0.353051	0.243696	0.0893129	0.250765	0.106847	-0.21721	0.129433	-0.00205221	0.336526	0.20414	0.15928	0.201848	0.125773	0.117192	-0.21889	0.0711071	-0.243168	-0.108239	0.171809	0.0666067	0.319472	0.243504	0.354479	0.331125
PA.34.1	-0.0570297	-0.0637864	-0.000612061	-0.0620582	-0.0726313	-0.0382838	0.0215302	0.218926	-0.207621	-0.079868	0.190771	0.0263666	0.10111	0.215494	-0.0736514	0.0456406	-0.0942214	0.169529	0.0265827	0.349343	0.12216	-0.230543	0.393711	-0.0459886	0.181362	0.186007	0.00668467	0.0070207	0.277048	-0.0371917	-0.227759	-0.00187219	0.00409241	-0.00506451	0.0352235	-0.0450525	0.0532613	0.228191	0.0376478	-0.0565137	0.0566937	-0.203984	-0.139778	-0.00828083	0.0628743	0.134521	0.14267	0.116412	0.169577
PA.34.2	-0.0387519	-0.169469	0.188923	0.149451	-0.112919	0.144338	0.175278	0.258662	-0.215482	-0.0237144	0.227459	0.137882	0.146367	0.366001	0.0552895	0.319376	-0.14417	0.120432	0.281236	0.20204	0.20312	0.0615062	0.391323	0.392667	0.18117	0.378866	0.126877	0.170261	0.183558	0.00818482	0.0152895	0.180906	0.112043	0.163072	0.129625	0.0680588	0.0752355	0.378662	0.2397	-0.106535	-0.020018	-0.0648545	-0.116748	0.0814641	0.291017	0.245281	0.369565	0.244584	0.409637
PA.36.0	0.0117732	-0.0630783	0.149715	0.180654	-0.030315	0.107123	0.118908	0.1173	0.009949	0.232787	0.107627	0.211617	-0.0658266	0.169085	0.108551	0.11928	-0.0857486	0.0181818	0.104722	-0.162796	-0.107039	-0.15916	0.126493	-0.0106451	-0.0142934	0.0174137	-0.100222	0.113627	0.0473567	-0.0812601	-0.0437924	0.069859	0.149235	0.127309	0.147051	0.0142214	0.2412	0.135998	0.030459	-0.00154816	0.09973	-0.133921	-0.193759	0.166325	-0.0611701	0.0571737	0.124788	0.0824722	0.157708
PA.36.4	0.1236	-0.0136454	0.29853	0.286037	0.02003	0.310279	0.348419	0.61595	-0.168605	0.0664266	0.445317	0.39796	-0.0649985	0.3191	0.229079	0.381722	-0.0938854	0.113711	0.257714	0.357408	0.334017	-0.0680588	0.468791	0.331101	0.323084	0.48378	0.299106	0.397984	0.40498	0.229787	0.0285149	0.287033	0.182022	0.209601	0.155944	0.173909	0.275032	0.318608	0.370381	-0.234899	0.138638	-0.107999	-0.178626	0.289709	0.126601	0.294437	0.410609	0.317612	0.492925
PA.38.6	0.135134	0.0408401	0.24402	0.185455	0.0512211	0.273399	0.290429	0.46291	-0.0792919	0.128269	0.227339	0.29853	0.133957	0.393399	0.20252	0.398812	-0.125473	0.131161	0.224314	0.0651785	0.0814521	0.00117612	0.325281	0.326193	0.13619	0.469787	0.222082	0.431167	0.365845	0.151059	0.0793759	0.515716	0.224338	0.2379	0.27952	0.111671	0.3618	0.321524	0.187987	-0.0774797	0.236052	-0.229319	-0.00685268	0.24168	0.180006	0.357708	0.314035	0.24036	0.390303
PC.24.0	0.0273747	0.0440924	0.106007	0.121968	0.0474767	0.104458	0.146907	0.0444524	-0.12048	-0.0415482	0.122244	0.000432043	0.0929013	0.121524	0.136562	0.08042	-0.193735	0.0120012	0.16126	0.0315032	0.231335	0.114887	0.0868407	0.298422	0.0129853	0.310111	0.0228863	0.12006	0.100474	0.00434443	0.0346595	0.143162	0.0947615	0.0485689	0.0347195	0.0788479	0.0484608	0.0453045	0.10453	-0.134209	-0.0709031	-0.0175338	0.0533693	0.167225	0.154971	-0.0444044	0.124536	0.0740474	0.168113
PC.26.0	-0.174905	-0.13505	-0.128377	-0.0726073	-0.090417	-0.197612	-0.14135	-0.0856046	-0.0351515	-0.039928	-0.12036	-0.212433	0.019658	0.0189859	-0.0759196	0.0543054	-0.0680588	0.00920492	0.020174	0.243672	0.158764	0.360708	-0.0127933	0.309439	-0.0362916	0.314239	0.236028	0.289613	0.393243	0.275776	0.367345	0.367693	0.0029883	-0.019754	-0.184062	-0.16072	-0.0921692	-0.0612421	-0.079784	0.113615	-0.295758	-0.132637	0.0442484	-0.0424962	0.208341	-0.203192	-0.04018	0.0835164	0.00382838
PC.28.1	0.130261	0.170969	-0.0356796	-0.134221	0.129121	-0.0337954	-0.059742	0.0171497	0.0873687	0.0233663	0.00186019	0.0369637	0.0807081	0.266355	0.0169817	0.0863006	-0.0633783	0.15904	-0.112343	0.355704	0.241728	-0.247225	0.070111	-0.131389	0.206313	0.188407	0.0414281	-0.101134	0.179046	-0.0639424	-0.410801	-0.0451365	-0.319808	-0.0427123	0.395968	-0.156508	-0.00862886	0.103582	0.163204	-0.166805	0.113867	-0.31508	-0.131521	0.0888449	0.261014	0.186499	0.219394	0.323648	0.199904
PC.29.0	-0.214881	-0.134197	-0.209745	-0.177222	-0.146523	-0.27622	-0.208425	-0.145167	-0.0649865	-0.130573	-0.107771	-0.199556	0.079652	0.0177018	-0.185647	0.0518332	-0.104794	-0.0367237	-0.0229103	0.233687	0.198896	0.370573	-0.0544374	0.206397	-0.0774317	0.305587	0.237276	0.280552	0.446301	0.299178	0.431503	0.407645	0.010105	-0.0824002	-0.244752	-0.234383	-0.139898	-0.0967417	-0.0725473	0.0933333	-0.39976	-0.132709	0.196532	0.0255986	0.0154815	-0.330081	-0.217042	-0.0673627	-0.133693
PC.30.0	0.164428	0.121356	0.115284	0.0764236	0.0887009	0.0960576	0.145491	0.287081	-0.0110291	0.019586	0.230051	0.186919	0.0323432	0.377846	0.129109	0.297342	-0.210081	0.184758	0.0741074	0.527801	0.347471	-0.115692	0.272151	0.205845	0.250669	0.551095	0.360612	0.288677	0.507747	0.240456	-0.111239	0.33931	-0.130957	0.185551	0.246325	-0.00594059	0.224398	0.162184	0.167429	-0.0920732	0.00493249	-0.281608	-0.136634	0.249133	0.250105	0.16042	0.272439	0.377054	0.327213
PC.30.1	0.204644	0.173213	0.128281	0.0784158	0.170225	0.128377	0.135794	0.234299	0.0462046	-0.0246145	0.193423	0.180282	0.245485	0.330261	0.103594	0.229019	-0.187051	0.206877	0.0891089	0.374725	0.307783	-0.13535	0.265755	0.155548	0.228539	0.42387	0.224494	0.163264	0.36084	0.080336	-0.201344	0.234803	-0.155536	0.0412241	0.199748	-0.0839964	0.126157	0.176886	0.184866	-0.133717	0.114479	-0.342406	-0.110591	0.207621	0.211725	0.166889	0.215866	0.345995	0.286721
PC.30.2	-0.150159	-0.0794719	-0.143498	-0.0710351	-0.0641344	-0.222238	-0.125833	-0.128869	-0.00589259	-0.00987699	-0.141758	-0.190531	0.100738	-0.00362436	-0.0235224	0.0649865	-0.0710951	0.00253225	-0.00685268	0.126145	0.0606541	0.49613	-0.134065	0.278884	-0.159112	0.305527	0.143486	0.284572	0.295026	0.275212	0.492997	0.345515	0.0621062	-0.0159856	-0.23574	-0.156256	-0.0285149	-0.100378	-0.138734	0.0874167	-0.369409	-0.102226	0.249097	-0.0226463	0.0807681	-0.368437	-0.215866	-0.125857	-0.146715
PC.30.3	-0.0294509	0.000144014	-0.0980138	-0.131653	-0.0321392	-0.138926	-0.109739	0.00590459	-0.00376838	-0.0537294	-0.0331833	-0.0849205	0.069979	0.136286	-0.0967417	0.0920372	-0.13949	0.0746115	-0.0156976	0.396748	0.170993	-0.0527693	0.0638704	-0.00634864	0.146799	0.233519	0.174557	0.00561656	0.297054	0.166421	-0.115044	0.0916772	-0.307111	0.0129253	0.0968137	-0.201032	-0.03958	0.0277108	0.105791	-0.000588059	-0.13931	-0.225371	-0.0836244	0.0226823	0.0430963	-0.0568257	0.0506331	0.213453	0.0672187
PC.31.0	0.165173	0.13535	0.0326073	-0.0280588	0.0993459	0.0333273	0.0136814	0.145467	0.0841044	0.0245305	0.175626	0.133441	0.0419442	0.325737	0.0809241	0.277348	-0.139118	0.144002	-0.00818482	0.452961	0.327561	-0.06015	0.151179	0.0853405	0.162148	0.35688	0.337774	0.22039	0.449949	0.294893	-0.0432163	0.31814	-0.136562	0.17823	0.0848365	-0.0108371	0.089529	0.0139094	0.126985	-0.0627543	0.0905971	-0.255938	-0.179106	0.194863	0.192991	0.206841	0.240612	0.387891	0.291197
PC.31.1	-0.182574	-0.0769397	-0.233483	-0.200972	-0.103762	-0.296658	-0.195368	-0.137318	-0.0783198	-0.186895	-0.104278	-0.204044	0.00790879	-0.0484008	-0.246589	0.0226343	-0.0528173	-0.00967297	-0.0716472	0.261362	0.16156	0.349331	-0.119052	0.108275	-0.107879	0.225443	0.215566	0.255074	0.409505	0.298398	0.458626	0.368233	0.0843924	-0.0214941	-0.323456	-0.165281	-0.124044	-0.15712	-0.104902	0.131269	-0.366229	-0.0706871	0.211017	-0.0515932	-0.059562	-0.358908	-0.28084	-0.111023	-0.185695
PC.31.2	-0.161524	-0.118524	-0.0993099	-0.0618182	-0.125989	-0.120444	-0.0643744	-0.152787	-0.0830483	-0.118644	-0.0561056	-0.110039	-0.069727	-0.0485689	-0.103498	0.0891809	-0.101998	-0.0464086	-0.059754	0.0356076	-0.039784	0.37751	-0.0510291	0.303822	-0.150519	0.24366	0.294605	0.317276	0.372997	0.185395	0.448629	0.347723	0.232103	0.0839484	-0.294257	0.0090369	-0.00560456	-0.00957696	-0.0152655	0.0263906	-0.257198	0.170093	0.0465887	-0.0293069	-0.0731833	-0.326385	-0.148263	-0.0959016	-0.114911
PC.32.0	0.140354	0.0531413	0.181386	0.168473	-0.00284428	0.164272	0.216214	0.242064	0.0823042	0.108911	0.292553	0.142046	0.0184818	0.509523	0.240756	0.319016	-0.193267	0.0730873	0.0978938	0.412745	0.217102	0.0241104	0.218254	0.298038	0.171713	0.462874	0.478548	0.399268	0.395248	0.48246	0.113843	0.370933	0.0633183	0.429055	0.140762	0.21529	0.253021	0.0506811	0.101494	0.171329	0.0737594	-0.149499	-0.0661026	0.130717	0.40336	0.222322	0.324908	0.416826	0.348863
PC.32.1	0.212805	0.0920372	0.212733	0.129925	0.0767837	0.190135	0.238056	0.366265	-0.0611461	0.00162016	0.326265	0.321536	0.0089769	0.364104	0.16012	0.307519	-0.197576	0.200336	0.0762796	0.566817	0.340342	-0.295662	0.364116	0.0718032	0.306619	0.442892	0.258578	0.11958	0.367585	0.0779358	-0.291917	0.149739	-0.144698	0.202808	0.309079	0.0264386	0.1961	0.269559	0.177966	-0.221914	0.128689	-0.21583	-0.187915	0.247645	0.151203	0.358332	0.388959	0.409385	0.447705
PC.32.2	0.104002	0.0757636	0.118044	0.116736	0.0489169	0.0715872	0.166949	0.176382	-0.0230543	-0.0311431	0.216274	0.143666	-0.0153615	0.360384	0.107555	0.274611	-0.196856	0.237708	0.0527333	0.465083	0.240972	-0.0229583	0.168089	0.221482	0.229907	0.478248	0.369289	0.17793	0.395836	0.153723	-0.113567	0.243408	-0.0791839	0.128905	0.231479	0.0154575	0.187327	0.167597	0.105107	-0.0428083	-0.140666	-0.221086	-0.168461	0.207573	0.192619	0.0748515	0.234215	0.35676	0.293621
PC.32.3	-0.126037	-0.205929	0.0623222	0.107771	-0.210945	0.00180018	0.131089	0.288053	-0.309247	-0.0539574	0.226379	0.166553	0.0574137	0.303354	-0.00148815	0.309079	-0.195704	0.07958	0.283168	0.432415	0.252133	-0.039604	0.465647	0.298818	0.411809	0.595068	0.266847	0.235596	0.518416	0.0781398	-0.0623462	0.291449	0.0180018	0.00265227	0.172013	-0.0529133	0.193651	0.415734	0.309679	-0.133177	-0.049613	-0.0805521	-0.113027	0.234395	0.185155	0.0215182	0.270507	0.270963	0.320936
PC.32.4	0.232703	0.210153	0.0906571	-0.00946895	0.164956	0.0768677	0.105671	0.171845	0.0832763	-0.029763	0.128509	0.157624	0.00159616	0.29943	0.108071	0.152391	-0.140642	0.138566	-0.0545335	0.508695	0.301482	-0.212001	0.129445	0.0212301	0.134953	0.388935	0.318524	0.147543	0.367981	0.18195	-0.208569	0.202028	-0.213861	0.0985899	0.215518	-0.049577	0.111323	0.0923132	0.0824722	-0.130045	0.0267267	-0.307879	-0.117912	0.17979	0.137054	0.162424	0.202244	0.315116	0.231035
PC.33.0	-0.00529253	-0.079856	0.0111731	-0.0080048	-0.127141	0.040204	0.0460246	0.235776	-0.109271	0.0605341	0.231479	0.0346475	0.112175	0.25667	-0.00727273	0.2376	-0.158368	0.00536454	0.115176	0.268263	0.435224	0.0829643	0.317108	0.264614	0.312619	0.344158	0.271287	0.17637	0.363588	0.198116	0.010081	0.299598	0.0141614	0.145587	0.0918092	-0.0811521	0.0223342	0.194179	0.296358	-0.059526	0.13703	-0.0548335	-0.0839364	0.134977	0.209097	0.21703	0.235692	0.273351	0.313075
PC.33.1	0.00151215	-0.0573417	0.0961176	0.080156	-0.0828923	0.0622622	0.120024	0.282856	-0.114563	0.0146535	0.215662	0.131185	0.0758596	0.276412	0.0113891	0.251485	-0.213153	0.0931533	0.12246	0.239928	0.328845	0.0184818	0.287285	0.163696	0.355956	0.356772	0.161608	0.14231	0.277804	0.0819562	-0.126229	0.139706	0.040144	0.177462	0.281344	0.000864086	0.153519	0.2803	0.282664	-0.22057	0.0971017	-0.0581098	-0.145659	0.25799	0.130369	0.160768	0.148995	0.188311	0.248581
PC.33.2	0.0361476	-0.0246985	0.11604	0.145779	-0.030447	0.11796	0.123348	0.301314	-0.172073	-0.0652865	0.210189	0.13595	0.0239064	0.326025	0.0070447	0.292973	-0.198548	0.127585	0.136946	0.188611	0.238956	0.0485329	0.264986	0.345143	0.37625	0.470975	0.195104	0.242016	0.400072	-0.03952	-0.137174	0.36372	0.0686469	0.101026	0.358404	-0.00148815	0.269031	0.355248	0.363756	-0.196664	0.0913291	-0.202544	-0.162232	0.357816	0.18417	0.186511	0.350663	0.438308	0.420018
PC.33.3	0.00907291	0.0362196	-0.0255866	-0.0185059	0.00352835	-0.0565737	-0.00626463	0.0458086	-0.0761596	-0.0454245	0.1188	0.0214941	0.0290069	0.251773	-0.0466727	0.208029	-0.020126	0.199808	-0.0217102	0.349163	0.205413	0.0354155	0.0629703	0.155704	0.230495	0.33583	0.240696	0.131365	0.415278	0.139394	-0.0134053	0.252601	-0.0473567	-0.0541494	0.0314791	-0.0110291	0.0434203	0.0740714	0.201308	-0.0238944	-0.10207	-0.197624	-0.0518572	0.105239	0.120468	-0.0684668	0.0911251	0.249865	0.117624
PC.34.1	0.268491	0.16324	0.258974	0.163456	0.119556	0.236352	0.228515	0.230003	0.191179	0.0844284	0.299418	0.225467	0.0480528	0.510183	0.166409	0.131101	-0.0353435	0.0982178	-0.00385238	0.519556	0.227615	-0.32288	0.194947	-0.0689709	0.15664	0.14297	0.280612	0.0175938	0.13961	0.171281	-0.277216	0.0105371	-0.136538	0.354635	0.244488	0.233627	0.102322	0.0780318	0.0755476	0.050321	0.0823282	-0.1982	-0.294989	0.0572097	0.171149	0.319412	0.318596	0.447117	0.36042
PC.34.2	0.171773	0.0059886	0.34339	0.365173	0.0282028	0.325569	0.332121	0.492829	-0.258254	0.00565257	0.417378	0.302154	0.120504	0.449553	0.201128	0.367909	-0.281152	0.225287	0.304518	0.165701	0.316448	-0.099898	0.515872	0.47634	0.382106	0.548491	0.156676	0.242616	0.313651	-0.0923732	-0.28444	0.226319	0.0984098	0.189943	0.381278	0.115236	0.401176	0.504374	0.437504	-0.310399	0.213969	-0.226499	-0.25703	0.358536	0.307723	0.383918	0.590519	0.481296	0.62147
PC.34.3	0.21787	0.174725	0.196364	0.193963	0.158632	0.202028	0.24474	0.323	-0.0466727	0.00759676	0.320276	0.303714	-0.0177138	0.376226	0.182214	0.278716	-0.198176	0.262538	0.107099	0.409277	0.312151	-0.108851	0.300138	0.275464	0.331653	0.552727	0.310171	0.245905	0.484464	0.0528053	-0.2003	0.318932	-0.0246265	0.147771	0.320948	0.0806601	0.324308	0.301158	0.232067	-0.129745	0.0660306	-0.244584	-0.178062	0.372529	0.250321	0.213369	0.371977	0.420426	0.422874
PC.34.4	0.164644	0.0990339	0.215086	0.205713	0.0787759	0.190555	0.262442	0.452949	-0.0943894	-0.0218302	0.303978	0.320948	-0.0350675	0.361992	0.172913	0.350627	-0.225515	0.247297	0.163348	0.463078	0.341914	-0.0416562	0.375806	0.334509	0.29991	0.637108	0.434575	0.457942	0.643252	0.241212	-0.0244464	0.484836	0.0279988	0.186931	0.24192	0.0387759	0.316604	0.275032	0.213549	-0.145971	0.0578938	-0.253693	-0.186847	0.366853	0.183078	0.189523	0.337342	0.41727	0.418494
PC.34.5	-0.109535	-0.149619	-0.0253585	-0.000936094	-0.187651	-0.099574	-0.0368677	0.214689	-0.258794	-0.0908011	0.120384	0.050393	0.0775158	0.213561	-0.168245	0.146115	-0.113195	0.133417	0.195092	0.306727	0.320408	0.132577	0.273735	0.210021	0.293369	0.408269	0.255902	0.289853	0.554431	0.135338	0.0280828	0.382442	0.0216262	0.0123012	0.0473447	-0.184002	0.0349115	0.242244	0.22411	0.0322952	-0.0287909	-0.06039	-0.134497	0.217474	0.177714	0.000576058	0.201956	0.277456	0.252037
PC.35.0	-0.286493	-0.280804	-0.112439	-0.010273	-0.237468	-0.100366	-0.0369277	0.179406	-0.293477	-0.0917732	0.104506	-0.0864926	0.0660186	0.114911	-0.0926973	0.290897	-0.165473	0.039592	0.212481	0.0318032	0.152055	0.252409	0.252169	0.293261	0.297834	0.314203	0.0111851	0.135218	0.232619	0.100858	0.1182	0.232331	0.0216022	0.116496	0.0988539	-0.0354875	0.195824	0.253333	0.295734	-0.0179658	0.0470327	-0.108539	-0.174881	0.241176	0.172865	0.139346	0.269295	0.335866	0.318428
PC.35.1	0.040468	-0.0668467	0.169049	0.149559	-0.0683828	0.185827	0.172421	0.412301	-0.15832	0.0556616	0.327585	0.17919	0.111167	0.38039	0.0577378	0.23544	-0.234635	0.0161536	0.22261	0.289601	0.397084	-0.00273627	0.474299	0.289313	0.389979	0.365137	0.167429	0.202592	0.336718	0.0534773	-0.121548	0.293417	0.0267627	0.15712	0.282316	0.0751875	0.189199	0.416694	0.399172	-0.262178	0.193711	-0.174113	-0.198164	0.284128	0.172781	0.30333	0.4027	0.362772	0.502766
PC.35.2	-0.142694	-0.124548	-0.0873327	0.00784879	-0.157612	-0.0566337	-0.0876328	-0.0552295	-0.0841044	-0.140102	-0.0161296	-0.20486	0.128737	0.179982	-0.159412	0.117828	-0.079904	0.0109211	0.0854485	-0.125461	0.0753915	0.328257	-0.00944494	0.309559	0.149463	0.0828203	0.0727033	0.059706	0.0727033	-0.0564536	0.00706871	0.201848	0.118428	0.00806481	0.0969337	-0.0170057	-0.0243744	0.20432	0.288077	-0.010237	-0.0532733	0.00624062	-0.101278	0.0754755	0.182958	-0.00916892	0.159244	0.281644	0.232127
PC.35.3	-0.0145695	-0.0579058	0.109463	0.137498	-0.0553495	0.070051	0.117612	0.292853	-0.285521	-0.268371	0.164548	0.114467	0.0661386	0.22447	-0.0252505	0.198272	-0.332289	0.0732313	0.249097	0.0351515	0.19892	0.129469	0.364044	0.323096	0.298506	0.407753	0.112199	0.169265	0.253897	-0.0727033	-0.158272	0.148227	0.190735	0.0632103	0.189307	0.0345755	0.209001	0.376226	0.394947	-0.270327	0.135422	0.0292349	-0.101254	0.252925	0.188503	0.0956736	0.319544	0.305383	0.34069
PC.35.4	0.10393	0.0275548	0.181842	0.174725	-0.0148935	0.173621	0.196184	0.486685	-0.147339	-0.00769277	0.209901	0.256682	-0.08048	0.282112	0.0776358	0.267699	-0.175458	0.108239	0.173885	0.321464	0.321572	0.0876808	0.322832	0.347663	0.309403	0.530849	0.44048	0.584482	0.670399	0.249217	0.139022	0.599184	0.190363	0.220858	0.196424	0.0647465	0.30435	0.257654	0.237288	-0.0756076	0.163528	-0.164944	-0.145767	0.32384	0.128329	0.180786	0.286325	0.38225	0.345599
PC.35.5	-0.0776118	-0.127405	0.0583138	0.0292349	-0.104614	0.0219982	0.0727513	0.361728	-0.223054	-0.0519052	0.122052	0.164236	-0.0151095	0.203084	-0.0732793	0.243996	-0.108599	0.12072	0.155236	0.333897	0.222106	-0.0518452	0.374713	0.216682	0.385299	0.396928	0.278956	0.291113	0.608149	0.0469847	-0.0693669	0.416838	0.0431923	0.0210141	0.143522	-0.0761836	0.149475	0.270687	0.309355	-0.136058	0.139994	-0.0852685	-0.317336	0.36252	0.0861686	0.1985	0.342622	0.42333	0.41721
PC.35.6	0.230231	0.233711	0.0375518	-0.0711431	0.124956	0.0979898	0.00454845	-0.00873687	0.237348	0.0841884	-0.00940894	0.0317312	-0.0589379	0.11526	-0.0289109	-0.069739	-0.00518452	0.172865	-0.138266	0.108143	0.138734	-0.234719	-0.0726073	-0.12084	0.114083	-0.152295	0.198056	0.040072	0.102142	0.108323	-0.251461	0.146559	-0.0327633	0.246205	0.142682	0.152307	-0.0290189	-0.191431	-0.0457366	0.0865647	0.332589	-0.0321512	-0.214629	0.040048	0.0232943	0.285245	0.0759316	0.248773	0.0546655
PC.35.7	0.010273	0.0508611	-0.0273867	-0.0531173	0.0465767	0.00764476	0.0322712	0.0878488	-0.0851245	-0.191107	0.039748	0.030387	-0.108311	0.158248	-0.0954695	0.152463	-0.252901	0.122172	0.130897	0.050273	0.191023	0.0787999	0.111263	0.267255	0.129757	0.170885	0.128725	0.17745	0.257234	-0.0129373	-0.0619022	0.299766	0.0582898	0.148731	0.19898	0.116424	0.169361	0.205869	0.242268	-0.247501	0.02039	-0.160528	-0.129565	0.110015	0.0972457	0.131749	0.190567	0.186415	0.250777
PC.36.0	-0.0738074	-0.0586379	-0.0847165	-0.0979178	-0.0547615	-0.110459	-0.103714	-0.0488449	-0.0324512	0.0294749	-0.144758	-0.129229	0.341746	0.030171	-0.140054	0.182766	-0.0526733	-0.0161896	-0.0412601	0.0388479	-0.0969457	-0.0112091	0.106139	0.0263546	-0.090165	0.163984	-0.0807921	0.0463846	0.143138	0.0394239	0.0550375	0.118188	-0.0347195	-0.0846445	-0.0708911	-0.187819	-0.0662946	0.0238464	0.0377078	0.0253945	0.00666067	-0.090417	0.0339274	0.00547255	-0.0567537	-0.0527213	-0.00090009	-0.0264986	0.0173897
PC.36.1	0.303474	0.37799	0.00248425	-0.090153	0.308647	0.019826	-0.0049805	-0.0359076	0.345755	0.0941254	0.100954	0.000516052	-0.0137534	0.354395	0.0764716	0.0493849	0.0636304	0.140714	-0.269631	0.462742	0.182922	-0.160768	-0.0829403	-0.161008	0.09961	0.0757516	0.184698	-0.0580498	0.0967297	0.168521	-0.230471	-0.0138494	-0.273531	0.195104	0.126313	0.120096	-0.010165	-0.134029	0.0368077	0.0971977	0.0525413	-0.221038	-0.188071	0.108167	0.181074	0.117228	0.150771	0.362304	0.148011
PC.36.2	0.0426043	-0.0862646	0.186667	0.294653	-0.0289469	0.195668	0.234599	0.332013	-0.320588	-0.0260546	0.36228	0.139226	0.116664	0.362448	0.135782	0.367441	-0.261266	0.0989739	0.326433	0.101278	0.272175	0.142274	0.445737	0.580846	0.310399	0.535506	0.1194	0.161632	0.190111	-0.0877528	-0.172745	0.195596	0.116604	0.0449805	0.283948	0.0567177	0.288833	0.492709	0.484644	-0.245965	0.119148	-0.165401	-0.136526	0.256394	0.36378	0.267459	0.512127	0.348035	0.505383
PC.36.3	0.283984	0.127417	0.291785	0.28372	0.134137	0.323696	0.327189	0.399748	-0.112715	0.020378	0.394635	0.341482	-0.0371797	0.421494	0.21775	0.247513	-0.177954	0.152859	0.180882	0.395944	0.350039	-0.185563	0.411905	0.323612	0.305035	0.464554	0.359892	0.108779	0.255554	-0.030039	-0.325137	0.129169	0.0113051	0.167897	0.320564	0.163156	0.260762	0.397192	0.387231	-0.197876	0.174809	-0.128053	-0.337606	0.231083	0.278272	0.42279	0.529241	0.411305	0.505755
PC.36.4	0.272679	0.156628	0.339874	0.300198	0.105311	0.333357	0.334629	0.586835	-0.0188179	0.079868	0.353807	0.428395	-0.118092	0.322904	0.286505	0.23934	-0.119904	0.217486	0.12204	0.300642	0.30429	-0.0607981	0.338062	0.276184	0.264986	0.457762	0.458602	0.569397	0.58057	0.306667	0.0377438	0.452697	0.210657	0.358872	0.240588	0.16234	0.363276	0.198608	0.156064	-0.0562736	0.315692	-0.132829	-0.183258	0.414389	0.231995	0.366337	0.401656	0.453861	0.446133
PC.36.5	0.158932	0.143318	0.17967	0.129697	0.130789	0.163408	0.191239	0.411701	-0.0266307	-0.0218422	0.24126	0.294497	-0.0705671	0.287729	0.0982298	0.194671	-0.128185	0.251425	0.0461806	0.421542	0.270531	-0.0864446	0.309835	0.25541	0.292901	0.499946	0.394263	0.489121	0.75766	0.195956	-0.0269547	0.497378	0.0605221	0.130621	0.18015	0.0108731	0.253105	0.196424	0.167861	-0.0392319	0.117912	-0.189511	-0.234299	0.386787	0.153771	0.188851	0.313003	0.424554	0.347963
PC.36.6	0.0734353	0.0444644	0.134017	0.0985299	0.029931	0.114323	0.170585	0.365713	-0.060162	0.0317672	0.188131	0.231215	-0.101686	0.334821	0.0732193	0.234383	-0.155488	0.218038	0.122196	0.434083	0.330741	-0.0191419	0.327957	0.294473	0.293465	0.554719	0.445653	0.47934	0.699382	0.205617	0.020294	0.569673	0.0305911	0.185059	0.194107	-0.0182658	0.24366	0.248905	0.173237	-0.0513171	-0.00157216	-0.22465	-0.285353	0.306139	0.161656	0.113231	0.259766	0.376394	0.32018
PC.37.1	0.266691	0.324128	0.0464566	-0.00422442	0.303702	0.108803	0.0458926	0.0922892	0.268023	0.139694	0.10243	0.0374077	0.0234263	0.248857	0.216814	0.0963696	0.0505971	0.0862166	-0.0484848	0.322796	0.248281	-0.0168017	0.137126	0.108203	0.202904	0.229967	0.127981	0.0453885	0.164752	0.108143	-0.131773	0.0664746	-0.0618302	0.182382	0.0909211	0.105035	0.0352235	0.0849925	0.24366	-0.11616	0.108467	-0.0840804	-0.0739634	0.0852685	0.290153	0.0676148	0.171473	0.204584	0.210921
PC.37.2	-0.288557	-0.276028	-0.126781	-0.0731713	-0.222646	-0.173129	-0.0815602	-0.0184938	-0.22243	-0.253285	-0.142682	-0.0720552	0.0263426	-0.0319112	-0.23562	0.0637384	0.0347675	0.116196	0.102574	-0.0631503	-0.0442724	0.0571017	0.167405	0.12018	0.130333	0.0207861	-0.117204	-0.0154695	0.0965257	-0.20462	-0.0705671	0.0137534	-0.11682	-0.0760516	0.0854485	-0.109199	-0.0131293	0.293081	0.178446	-0.242412	0.0351635	-0.0510651	-0.149187	0.130393	-0.0177018	-0.109235	0.00278428	0.0345275	0.0646745
PC.37.3	0.181194	0.0568857	0.32108	0.336142	0.0332433	0.299046	0.301902	0.431995	-0.163048	0.0982058	0.338086	0.176706	-0.0843684	0.327825	0.196568	0.203732	-0.259658	0.0507891	0.292901	0.292445	0.312955	-0.0794719	0.433279	0.334005	0.386055	0.477936	0.298746	0.181698	0.217486	0.0183618	-0.164848	0.189391	0.123708	0.190219	0.288941	0.175506	0.291029	0.372337	0.41937	-0.15652	0.141902	-0.0632823	-0.0956136	0.309079	0.376766	0.324356	0.506559	0.433087	0.548155
PC.37.4	0.0121092	-0.0711791	0.138458	0.177558	-0.0864806	0.174869	0.172001	0.487021	-0.206565	0.02009	0.189703	0.190267	-0.00258026	0.194443	0.0446685	0.237288	-0.142766	0.0255866	0.319904	0.0171737	0.197828	0.353723	0.341014	0.508959	0.224494	0.404092	0.346019	0.660042	0.537066	0.312091	0.348947	0.649061	0.389463	0.20276	0.0246985	0.140174	0.26285	0.303726	0.308683	-0.0386679	0.223942	0.0392559	-0.0966097	0.250429	0.0733633	0.145671	0.252445	0.225119	0.30057
PC.37.5	0.283384	0.147663	0.251497	0.143186	0.0858206	0.240168	0.205353	0.344266	0.0521572	-0.00178818	0.295086	0.286133	-0.125917	0.237684	0.172625	0.131845	-0.0563696	0.104686	-0.0590219	0.424398	0.274599	-0.294617	0.196364	0.029571	0.219586	0.143018	0.349175	0.204536	0.302442	0.228815	-0.165197	0.152919	-0.00546055	0.317912	0.20222	0.189379	0.153483	0.0622382	0.0130453	-0.000264026	0.203408	-0.0743834	-0.242136	0.15904	0.107243	0.435764	0.389343	0.4791	0.35994
PC.37.6	0.103678	0.0830123	0.0990819	0.0730633	0.0513771	0.12216	0.124716	0.312139	-0.101554	0.0387879	0.0928053	0.126109	-0.0980018	0.255974	0.00830483	0.152067	-0.119256	0.15502	0.0989019	0.252601	0.241548	0.0441044	0.234431	0.290105	0.320564	0.405113	0.359136	0.431431	0.566601	0.114659	0.010357	0.579826	0.10213	0.158716	0.220738	0.0480768	0.230483	0.195944	0.251977	-0.0933933	0.137402	-0.154299	-0.245101	0.298602	0.102274	0.137306	0.237744	0.37721	0.292445
PC.37.7	0.121968	0.113279	0.100882	0.0322592	0.0578578	0.168749	0.0817042	0.0809961	0.137054	0.00483648	0.0314791	0.125461	0.0477168	0.159556	0.0349595	0.0360396	-0.0612901	0.201368	0.0271107	-0.020054	0.13751	-0.0472967	0.0508011	0.0481608	0.185863	-0.0510051	0.134845	0.14219	0.15862	0.0290069	-0.167633	0.22297	0.0542574	0.241236	0.254401	0.18297	0.10105	-0.0274587	0.0586859	-0.0231143	0.295734	-0.0318752	-0.216046	0.150879	0.104938	0.254437	0.148191	0.268275	0.169685
PC.38.1	0.288209	0.190063	0.228719	0.1618	0.180606	0.227411	0.238248	0.110579	0.177894	0.0337714	0.233963	0.188311	-0.090309	0.453285	0.192631	0.102538	0.03976	0.16258	0.0241224	0.371185	0.275104	-0.070339	0.0955296	0.0632703	0.14417	0.144326	0.279544	0.0879208	0.0589379	0.214809	-0.0716592	0.0877408	-0.00735674	0.348299	0.105899	0.346775	0.0666067	-0.0594299	-0.000684068	0.118608	0.0347915	-0.0857966	-0.262742	0.0970537	0.32252	0.230963	0.264638	0.37631	0.269571
PC.38.2	0.230723	0.171509	0.188227	0.212265	0.158728	0.247705	0.305011	0.327249	-0.0918092	0.0877648	0.356436	0.344998	-0.0530573	0.361884	0.27772	0.368353	-0.173417	0.169289	0.135001	0.347843	0.304122	-0.0711791	0.353111	0.308551	0.370201	0.493837	0.251845	0.108767	0.262886	0.0458806	-0.207957	0.188683	-0.0392679	0.161488	0.341638	0.171893	0.360432	0.273987	0.315632	-0.237252	0.196136	-0.159388	-0.222526	0.309415	0.322616	0.278068	0.438956	0.352931	0.44216
PC.38.3	0.283468	0.194299	0.168005	0.105599	0.125761	0.179034	0.21865	0.286133	0.0433963	0.0162976	0.267663	0.262106	-0.106115	0.362916	0.166361	0.185947	-0.0610261	0.119928	0.0128773	0.596532	0.300666	-0.250909	0.21883	0.089577	0.282484	0.319436	0.577486	0.138506	0.292361	0.176118	-0.225203	0.137582	-0.107159	0.209793	0.189043	0.17871	0.0860126	0.151911	0.146643	0.0247705	0.141014	-0.090009	-0.332625	0.107723	0.24426	0.34465	0.374221	0.440768	0.327117
PC.38.4	0.11838	-0.0454845	0.285917	0.306175	-0.0485809	0.295758	0.329541	0.647813	-0.195248	0.128317	0.334149	0.299286	-0.070423	0.308407	0.251665	0.286481	-0.0967297	0.00265227	0.375986	0.221698	0.236484	0.16024	0.468995	0.520732	0.218638	0.517192	0.533645	0.724644	0.521992	0.436484	0.32336	0.589763	0.368893	0.277312	0.0070207	0.227747	0.313471	0.298998	0.23952	0.0332553	0.279472	0.0294389	-0.150939	0.176682	0.222454	0.325089	0.428131	0.283204	0.399076
PC.38.5	-0.20054	-0.425335	0.228299	0.282028	-0.398884	0.149403	0.305395	0.619454	-0.443648	-0.0772877	0.37733	0.248341	-0.0178458	0.332697	0.0473447	0.315128	-0.249637	-0.00430843	0.558488	0.358968	0.3582	0.110159	0.688953	0.468947	0.367885	0.58453	0.425479	0.564236	0.511347	0.432883	0.291689	0.498002	0.309235	0.305923	0.0241704	0.152871	0.341014	0.456322	0.319136	-0.00676868	0.0550495	-0.0282868	-0.176802	0.164044	0.0836604	0.168617	0.348131	0.247513	0.426559
PC.38.6	0.126433	0.0541014	0.149367	0.136202	-0.00729673	0.166109	0.155404	0.226163	0.0808161	0.207573	0.159964	0.079844	-0.146187	0.327117	0.0646745	0.126301	-0.0112211	0.0978458	0.0818602	0.170597	0.0966697	0.0936454	0.168785	0.322964	0.115896	0.250405	0.550219	0.501638	0.364368	0.420642	0.203168	0.603468	0.165965	0.373741	0.0675788	0.276172	0.194791	0.0244584	0.0349955	0.248473	0.149127	-0.0647465	-0.242064	0.0948455	0.188623	0.222814	0.233519	0.364776	0.248557
PC.38.7	0.418962	0.247477	0.479868	0.446085	0.191887	0.49697	0.431899	0.278224	0.0964656	0.282448	0.360732	0.335506	-0.103534	0.306127	0.397204	0.12006	-0.0485329	-0.0947015	0.0688629	0.0734833	0.155944	-0.0971377	0.222718	0.245917	-0.06039	0.22183	0.210453	0.184362	0.0448605	0.248905	0.0343234	0.0927093	0.311047	0.213009	0.0650465	0.26177	0.15622	-0.0412961	0.142106	-0.059922	0.157156	0.0356436	-0.0742874	0.0163216	0.145323	0.179562	0.184962	0.0693429	0.184554
PC.39.1	0.298638	0.336394	0.148671	0.106187	0.273783	0.230771	0.180606	0.0691269	0.160936	0.232787	0.188263	0.238728	-0.060438	0.170789	0.274911	0.105527	0.090405	0.287117	-0.18459	0.0425323	-0.050249	-0.258542	-0.120984	-0.206589	0.269439	-0.0380318	-0.172829	-0.243156	-0.0647105	-0.271467	-0.500474	-0.20456	-0.198176	0.0352715	0.507327	0.108839	0.190255	0.0460846	0.099562	-0.172541	0.38441	-0.142346	-0.184854	0.189415	0.13991	0.267591	0.246961	0.282592	0.193375
PC.39.3	0.411317	0.33919	0.170285	0.183642	0.294689	0.207453	0.193015	0.246889	0.167117	0.131941	0.174581	0.139766	-0.0515332	0.208533	0.210549	0.172169	0.0360996	0.156388	-0.00673267	0.309007	0.317924	0.0378518	0.11946	0.24006	0.207669	0.308887	0.307771	0.156928	0.277204	0.112775	-0.0759196	0.210249	0.0336154	-0.00432043	0.00589259	0.0240504	0.0886529	0.0182658	0.204452	-0.0928293	0.0863486	-0.0327633	-0.0816562	0.0938494	0.2409	0.150447	0.189139	0.264062	0.179262
PC.39.4	-0.307903	-0.249661	-0.156184	-0.0249745	-0.213909	-0.175902	-0.0725233	-0.0386559	-0.136214	-0.050141	-0.0345155	-0.169085	-0.0222742	-0.0892769	-0.0964176	0.0839724	-0.0491569	-0.0824002	0.165797	-0.0712751	0.080336	0.652601	-0.0427243	0.432775	-0.144386	0.2	0.211653	0.516568	0.34105	0.332685	0.79988	0.52036	0.340558	-0.0126973	-0.423786	-0.0213501	-0.0215422	-0.0447525	-0.0744914	0.196964	-0.379298	0.123168	0.246817	-0.0727393	-0.0568017	-0.412133	-0.241896	-0.272223	-0.181686
PC.39.5	-0.275524	-0.443912	0.13889	0.216406	-0.417666	0.0953375	0.226859	0.489553	-0.488905	-0.0386199	0.313207	0.169625	0.0474887	0.295602	-0.0186019	0.30153	-0.240756	-0.020102	0.555848	0.202388	0.351431	0.290033	0.62003	0.50315	0.419694	0.518368	0.331941	0.457954	0.476532	0.315956	0.283	0.48378	0.311095	0.198944	0.0788719	0.103738	0.293729	0.553975	0.415098	-0.0428803	0.0149175	0.0269307	-0.138938	0.118848	0.150051	0.0733393	0.317984	0.213441	0.39526
PC.39.6	0.0845245	-0.00728473	0.161272	0.131353	-0.0168617	0.145575	0.138386	0.397264	-0.120864	-0.0723792	0.198944	0.21757	0.104074	0.246313	0.0658746	0.169541	-0.182166	0.199628	0.214077	0.176442	0.223042	0.137078	0.297474	0.306499	0.283	0.362052	0.367345	0.386187	0.487561	0.194779	0.0451965	0.484176	0.13799	0.196196	0.167501	0.0788359	0.234587	0.208917	0.219862	-0.10327	0.0994299	-0.188695	-0.185515	0.21865	0.0852685	0.203456	0.249169	0.304134	0.341386
PC.39.7	0.140906	0.111647	0.0957096	0.0236064	0.0809481	0.148599	0.105719	0.104134	0.0521692	0.111587	0.079532	0.140894	-0.0518692	0.228575	0.0759316	0.0517612	-0.163144	0.283492	-0.0822562	0.181086	0.144182	-0.135242	0.195008	0.0622022	0.391779	0.182658	0.171737	0.0394599	0.22147	-0.0569217	-0.350495	0.151047	-0.187867	0.270747	0.485593	0.0767357	0.192067	0.259754	0.203228	-0.188515	0.300222	-0.105707	-0.334785	0.233819	0.173825	0.257462	0.306943	0.486553	0.346499
PC.39.8	-0.0459046	0.0286709	-0.0819562	-0.0752115	0.00933693	-0.0649505	-0.0184218	0.0268347	-0.0794479	-0.0457126	-0.0790039	-0.0230903	0.128809	0.0414041	-0.10237	0.114143	-0.151647	0.0343474	0.000660066	0.114755	0.0357396	0.201464	-0.0418722	0.116952	0.0721992	0.14291	0.14123	0.228083	0.246481	0.229259	0.205617	0.164416	0.103666	0.0784878	0.136178	0.0315992	0.0230303	0.0187459	0.0592859	0.0228983	-0.128845	0.0545335	-0.0822202	-0.00712871	-0.0659346	-0.116712	-0.0791479	-0.0424482	-0.125749
PC.40.0	-0.166373	-0.17601	-0.00615662	0.0560096	-0.144002	-0.0238944	0.0893729	0.179574	-0.208965	-0.0132853	0.180918	0.00524452	0.209445	0.286685	0.0838044	0.351035	-0.155476	-0.0785239	0.145647	0.0745155	0.0978338	0.0762076	0.170669	0.138614	0.174305	0.363504	-0.00541254	0.0951815	0.129301	-0.00886889	-0.0406241	0.0989259	0.0890969	-0.0484969	0.261794	-0.00247225	0.17565	0.273435	0.226907	-0.0848725	-0.0522892	-0.145695	0.0609061	0.168377	0.102082	0.0514851	0.260942	0.207969	0.306247
PC.40.1	-0.248761	-0.156124	-0.150471	-0.0411401	-0.0905491	-0.148035	-0.0891929	-0.126673	-0.0838644	-0.164848	-0.0917852	-0.217726	0.0951095	-0.0292229	-0.0931293	0.112043	-0.0616142	-0.0329673	0.150879	-0.230099	-0.0871887	0.607165	-0.0578338	0.38417	-0.167273	0.158536	0.0153975	0.320324	0.186859	0.171377	0.564908	0.393483	0.367813	0.0734233	-0.350903	0.128989	0.0717672	0.0238344	0.0328353	0.101506	-0.380966	0.089697	0.257426	-0.0132253	0.0118932	-0.335278	-0.1215	-0.195116	-0.0651305
PC.40.10	0.120036	0.0656946	0.152427	0.0885689	0.0192019	0.197636	0.1552	0.315584	-0.0494209	0.0591179	0.154467	0.247489	-0.0567057	0.290549	0.0925653	0.101806	-0.129865	0.223078	0.059526	0.272763	0.266955	-0.289157	0.342202	0.00391239	0.582034	0.188011	0.10285	0.000252025	0.255722	-0.107435	-0.448137	0.104794	-0.185599	0.127309	0.536442	0.0382238	0.208257	0.331077	0.291917	-0.172097	0.380822	-0.220882	-0.397036	0.338962	0.255038	0.395524	0.474167	0.528317	0.48018
PC.40.2	-0.328701	-0.241104	-0.17853	-0.0321872	-0.178938	-0.221542	-0.142562	-0.171137	-0.122148	-0.0586019	-0.0408881	-0.228611	0.0817402	-0.0654185	-0.118632	0.0689109	-0.0234143	-0.0773117	0.0985539	-0.222526	-0.0971977	0.575578	-0.0654425	0.354887	-0.234467	0.120144	-0.090249	0.285641	0.131617	0.0522052	0.627675	0.289421	0.274527	-0.0139934	-0.412529	-0.0749355	-0.0136334	0.0531293	-0.0517132	0.113951	-0.403264	0.0727033	0.281596	-0.0885689	-0.01973	-0.41571	-0.19574	-0.322844	-0.152199
PC.40.3	-0.0642664	0.040204	-0.166925	-0.0636064	0.0453765	-0.169973	-0.0872847	-0.188023	0.14321	-0.0163456	-0.102166	-0.128569	0.0147255	-0.147363	0.00138014	-0.0164176	0.00542454	-0.0333033	-0.0931893	-0.0553855	-0.0874047	0.522772	-0.235992	0.209853	-0.344902	0.126961	0.124344	0.328089	0.244296	0.332373	0.70411	0.327837	0.373609	0.0618182	-0.494053	-0.00758476	-0.070063	-0.239004	-0.257354	0.216586	-0.354179	0.170777	0.278524	-0.0718512	-0.0117132	-0.352775	-0.278788	-0.242316	-0.214161
PC.40.4	0.311995	0.150003	0.306355	0.31592	0.11682	0.304158	0.39664	0.555404	-0.0375518	0.168641	0.438308	0.37649	-0.0325353	0.371977	0.377522	0.368893	-0.202268	0.0825323	0.208545	0.511299	0.379226	-0.0210261	0.412001	0.331653	0.245173	0.521512	0.487465	0.404944	0.396976	0.404488	0.110759	0.35814	0.0936094	0.319256	0.13919	0.20282	0.34333	0.150927	0.153063	-0.0127093	0.137726	-0.108323	-0.13763	0.193315	0.251113	0.312487	0.420786	0.342598	0.430435
PC.40.5	0.127741	-0.0712271	0.274467	0.283924	-0.0844644	0.252361	0.338722	0.61685	-0.166253	0.129637	0.39898	0.347363	-0.02003	0.372409	0.241812	0.334197	-0.223378	0.00690069	0.343678	0.484836	0.368785	0.0323432	0.544794	0.388887	0.327585	0.562832	0.513411	0.47946	0.477	0.442112	0.177042	0.485725	0.148419	0.330837	0.13541	0.173765	0.356028	0.276868	0.234179	0.0188899	0.165125	-0.0908371	-0.217438	0.192379	0.217078	0.324224	0.447801	0.355764	0.48108
PC.40.6	0.267699	0.161848	0.28402	0.234275	0.127357	0.332721	0.347915	0.51652	-0.0369877	0.22399	0.352295	0.351719	-0.192427	0.392823	0.291653	0.223606	-0.10207	0.134137	0.16264	0.353771	0.366913	0.0338194	0.365569	0.387891	0.335434	0.50267	0.555512	0.560396	0.530045	0.345347	0.0854605	0.61895	0.165485	0.319844	0.223846	0.236364	0.353135	0.170705	0.138902	-0.0484128	0.324248	-0.185515	-0.245785	0.328341	0.278776	0.327561	0.398848	0.376358	0.393411
PC.40.7	0.0928893	-0.0148455	0.25823	0.272907	0.00277228	0.271827	0.327117	0.484032	-0.233939	0.0514971	0.321464	0.300774	-0.0325233	0.388107	0.167909	0.307963	-0.209757	0.127309	0.274623	0.207969	0.293153	0.148227	0.465755	0.508635	0.304302	0.555608	0.378146	0.455278	0.490921	0.167393	0.0343114	0.55898	0.256922	0.288173	0.269919	0.217546	0.388347	0.352091	0.297078	-0.14465	0.188683	-0.138746	-0.24366	0.295866	0.278404	0.254473	0.426955	0.382058	0.466631
PC.40.8	0.150075	0.113591	0.190759	0.170693	0.149643	0.187111	0.200432	0.36048	-0.0137174	0.0143414	0.221578	0.294665	-0.105203	0.356712	0.128869	0.26441	-0.197756	0.215326	0.108719	0.277108	0.215218	0.0593459	0.323228	0.399856	0.310987	0.57949	0.361056	0.526385	0.6352	0.193603	0.0654305	0.584146	0.111047	0.242376	0.305179	0.112163	0.346703	0.27712	0.240744	-0.142658	0.0784878	-0.228179	-0.229079	0.352967	0.219154	0.201344	0.325629	0.429679	0.372049
PC.41.4	-0.254341	-0.330933	0.000648065	0.10171	-0.341674	-0.0444284	0.10051	0.197876	-0.357108	-0.0294029	0.257606	0.0069727	-0.0440444	0.11544	-0.0237744	0.151527	-0.156532	0.11508	0.288557	0.104758	0.229607	0.13787	0.334689	0.334077	0.265419	0.239136	0.199964	0.236208	0.263246	0.103474	0.162232	0.15694	0.0991659	0.0519292	-0.0657786	-0.0221542	0.0824362	0.340186	0.164368	-0.0466127	0.0158656	-0.0687909	-0.00543654	0.0254545	0.138746	0.00415241	0.201092	0.00945695	0.179262
PC.41.5	0.0861086	0.0360156	0.0784398	0.0138134	0.0110771	0.132229	0.124308	0.353243	-0.0689109	0.0176058	0.199184	0.11514	0.0273387	0.273171	0.103846	0.0911011	-0.173765	0.0562256	0.0966337	0.346931	0.19964	0.114047	0.258422	0.331989	0.228179	0.275548	0.356256	0.336874	0.35562	0.219862	0.118128	0.337894	0.174473	0.0790159	0.10375	0.107771	0.0867807	0.158692	0.126253	-0.115932	0.0660066	0.00620462	-0.119556	0.0148695	0.282508	0.312571	0.343078	0.185227	0.268191
PC.41.6	-0.131401	-0.160384	-0.0153015	0.0258266	-0.206541	0.019586	0.0185659	0.162784	-0.079772	0.0217102	0.0551935	-0.0131893	-0.0187819	0.167501	-0.12192	-0.0145815	-0.0461806	0.103522	0.168749	0.250453	0.247657	0.178806	0.204776	0.212373	0.233903	0.178218	0.386823	0.29703	0.38297	0.236568	0.17529	0.432055	0.1182	-0.049577	-0.0345155	-0.0952415	-0.110723	0.0748635	0.126085	0.165641	-0.0891809	0.030387	-0.157276	0.00510051	0.0371077	-0.0523012	0.108851	0.237168	0.129853
PC.41.7	0.0368917	0.159412	-0.130081	-0.179754	0.173453	-0.10015	-0.150471	-0.175686	0.213213	-0.0144374	-0.225791	-0.00165617	0.10405	-0.0246985	-0.00688869	-0.114395	0.104194	0.281164	-0.195056	-0.0750195	-0.159064	-0.0871887	-0.16222	-0.151947	-0.0923852	-0.089781	-0.0721032	0.000312031	0.159184	-0.10189	-0.164128	-0.0342394	-0.126181	-0.0420162	0.00763276	-0.0765437	-0.0908851	-0.0175338	-0.0362076	0.0655146	0.0517252	-0.101014	-0.0343354	-0.0669307	0.0375398	-0.0343594	-0.0925293	0.0756076	-0.139286
PC.42.1	-0.29571	-0.232307	-0.138962	-0.0148575	-0.154587	-0.200888	-0.0928173	-0.0955416	-0.123264	-0.0864326	-0.00549655	-0.168797	0.140762	0.0646025	-0.0842844	0.19634	-0.0432643	-0.0233543	0.149055	-0.0660906	0.0367957	0.528581	-0.0235464	0.320888	-0.139154	0.272967	-0.0451005	0.32186	0.275884	0.141086	0.532721	0.334521	0.251377	-0.0242904	-0.247405	-0.0637144	0.0108851	0.0688629	0.00193219	0.0528773	-0.508839	0.0538494	0.348359	0.0111611	0.00228023	-0.400288	-0.144758	-0.137534	-0.0413681
PC.42.10	-0.0873807	-0.237204	0.167213	0.163948	-0.201056	0.0966697	0.181494	0.399676	-0.275308	-0.0128773	0.181146	0.249205	-0.050057	0.378266	-0.00733273	0.303126	-0.199268	0.227303	0.350015	0.282832	0.264086	0.090273	0.534065	0.449685	0.344302	0.53793	0.414365	0.509559	0.622706	0.225767	0.107267	0.566901	0.194599	0.191659	0.228383	0.0568737	0.291269	0.445953	0.309775	-0.0819682	0.0751995	-0.118476	-0.30327	0.188095	0.188995	0.197948	0.345863	0.325689	0.396868
PC.42.2	-0.0156136	-0.0380078	0.0963936	0.080024	-0.0665107	0.107915	0.122904	0.209913	-0.105347	-0.00492049	0.179778	0.154503	0.143438	0.359148	0.11904	0.235476	-0.262994	0.207477	0.103234	0.196436	0.180462	-0.150099	0.375026	0.107363	0.482112	0.345551	-0.0090249	-0.0193459	0.175662	-0.152655	-0.3645	0.0324032	-0.209169	0.133009	0.504026	0.0281788	0.258206	0.430939	0.346187	-0.276448	0.155056	-0.129841	-0.219238	0.248953	0.223882	0.19772	0.421578	0.384854	0.464626
PC.42.4	0.114155	0.0652025	0.142562	0.109139	0.00613261	0.164776	0.168497	0.262598	0.0174737	0.145119	0.205677	0.202832	0.00471647	0.270591	0.203972	0.193723	-0.330729	0.0932733	0.059586	0.294749	0.209145	-0.234611	0.291881	0.0331593	0.494737	0.286937	0.108431	0.0154815	0.106511	0.0618182	-0.270975	0.030399	-0.149211	0.156364	0.554803	0.0421962	0.212157	0.184086	0.247525	-0.213189	0.27514	-0.215374	-0.177618	0.212253	0.252817	0.327513	0.388251	0.369265	0.416142
PC.42.5	-0.0327393	0.0656226	-0.118032	-0.0414881	0.103126	-0.113003	-0.0357396	-0.129157	0.160084	0.0779478	-0.0151215	-0.0761116	-0.0291869	-0.0763396	0.0883648	0.0555656	-0.0649385	-0.157252	-0.0759676	0.00565257	-0.0419682	0.534785	-0.190471	0.297258	-0.331425	0.164728	0.190747	0.458818	0.309247	0.393183	0.764308	0.49937	0.303078	0.0533093	-0.431119	0.0107171	-0.00591659	-0.279952	-0.327261	0.267699	-0.377738	0.0321032	0.289301	-0.0379958	0.00480048	-0.333621	-0.219646	-0.213609	-0.186715
PC.42.6	-0.145035	-0.329673	0.192439	0.26255	-0.330189	0.153087	0.313711	0.529229	-0.386403	0.0456046	0.319736	0.302766	0.0868167	0.324056	0.125041	0.401128	-0.275092	0.0358476	0.522784	0.34399	0.409265	0.133021	0.670471	0.434767	0.337906	0.605113	0.385443	0.433543	0.466319	0.312103	0.173849	0.42003	0.181254	0.18297	0.121968	0.100858	0.375842	0.520936	0.287405	-0.0965137	0.108743	-0.0572217	-0.153123	0.146811	0.208569	0.170321	0.322016	0.163	0.412817
PC.42.7	-0.258854	-0.227015	-0.0792919	0.0512211	-0.175758	-0.0810801	-0.010093	-0.089733	-0.108167	-0.0871647	-0.0518212	-0.149223	0.00279628	-0.0717552	-0.114491	0.0767837	-0.120372	-0.0869847	0.168521	-0.134245	0.0159976	0.555536	-0.0212181	0.391275	-0.174749	0.149787	0.0929733	0.374461	0.201956	0.253717	0.674863	0.44204	0.335206	0.0260066	-0.307195	0.0629463	-0.000840084	-0.0592619	-0.0787999	0.140126	-0.43694	0.178122	0.209145	-0.0878728	-0.0791119	-0.430459	-0.268587	-0.283924	-0.175146
PC.42.8	-0.315752	-0.195452	-0.268683	-0.152343	-0.155476	-0.288101	-0.193315	-0.24198	-0.0580018	-0.0178458	-0.18489	-0.236796	-0.0330753	-0.129685	-0.139862	0.00714071	0.039544	-0.0736274	0.0560936	-0.108287	-0.0622982	0.614305	-0.216946	0.233483	-0.161752	0.0612301	0.0248305	0.283792	0.185023	0.193291	0.627483	0.342814	0.252001	-0.079604	-0.335266	-0.0584218	-0.0868047	-0.119904	-0.197852	0.236988	-0.366673	0.119364	0.266487	-0.114119	-0.0509811	-0.466439	-0.315164	-0.285257	-0.30369
PC.42.9	0.131029	0.120912	0.0370237	-0.010249	0.099646	0.0270147	0.0289349	0.0164656	0.167309	0.0545455	0.0918932	0.0949055	-0.0380918	0.354143	-0.00740474	0.202256	-0.0277228	0.136646	0.070183	0.390711	0.126205	0.0408641	0.0820282	0.0844644	-0.0211701	0.251941	0.418302	0.270507	0.394179	0.396232	0.14045	0.311983	-0.00733273	0.145191	0.10363	0.099754	0.102334	0.0577378	0.0356076	0.237564	-0.171425	-0.0806721	-0.0983498	-0.00619262	0.187219	-0.00814882	0.0659346	0.217042	0.104674
PC.44.2	-0.0622622	-0.107975	0.0636184	0.0945455	-0.102646	0.0780558	0.0840924	0.265587	-0.130237	0.0039724	0.279304	0.129349	0.110615	0.354515	0.0343234	0.294905	-0.166361	0.190195	0.0682268	0.211653	0.19808	-0.0932253	0.382934	0.131089	0.508647	0.347327	-0.0287549	0.000912091	0.193807	-0.0943654	-0.327741	0.0242664	-0.131341	0.0620822	0.494461	-0.0160456	0.205665	0.336082	0.406721	-0.193183	0.200972	-0.193399	-0.209709	0.325245	0.214521	0.194179	0.35814	0.422154	0.452913
PC.44.4	0.186607	0.0843564	0.256118	0.333165	0.0441284	0.257858	0.362376	0.569961	-0.171785	-0.0321632	0.35712	0.373081	0.0121812	0.3567	0.228539	0.464914	-0.148923	0.264626	0.293237	0.290393	0.258794	0.039892	0.468143	0.450861	0.304686	0.586271	0.374689	0.492325	0.527141	0.210573	0.0472847	0.471215	0.116352	0.25877	0.143486	0.190951	0.485065	0.370909	0.337246	-0.179718	0.214113	-0.204632	-0.167429	0.354539	0.13607	0.219886	0.334233	0.313207	0.424794
PC.44.5	0.152403	0.115224	0.154287	0.144494	0.0862166	0.166025	0.127933	0.309367	0.0341074	0.0984218	0.195572	0.245185	-0.00176418	0.3606	0.107219	0.237468	-0.173945	0.167141	0.131449	0.227051	0.114047	-0.211761	0.311299	0.0274347	0.494197	0.295494	0.0164896	0.0474647	0.287057	-0.0808161	-0.358836	0.0938014	-0.144806	0.215482	0.425119	0.103534	0.339562	0.21517	0.352007	-0.270663	0.336826	-0.163036	-0.323264	0.318116	0.205329	0.317996	0.455782	0.491329	0.464482
PE.30.0	0.00132013	-0.0269427	0.029739	0.000744074	-0.0416442	-0.0249385	-0.0461326	0.126517	-0.0385839	-0.0610861	0.0582058	-0.0259826	0.136562	0.284368	-0.0329073	0.219658	-0.30447	0.0767837	0.0844164	0.34357	0.243252	0.0274347	0.279832	0.200744	0.250465	0.456658	0.17907	0.14417	0.332829	0.204608	-0.137054	0.199412	-0.192175	0.169565	0.249769	-0.099862	0.113099	0.186631	0.214569	-0.166973	0.0446925	-0.169925	-0.158584	0.14417	0.279256	0.133729	0.289433	0.378122	0.325701
PE.32.0	0.0933093	0.00426043	0.194851	0.156136	0.0480888	0.182586	0.182778	0.322388	-0.147867	-0.171449	0.259502	0.148683	-0.0193699	0.295518	0.0525293	0.168641	-0.222418	0.133585	0.143198	0.285989	0.310939	-0.211485	0.333489	0.226403	0.308539	0.331641	0.12126	0.144314	0.29553	-0.147387	-0.299106	0.146679	-0.0827723	0.0875368	0.279412	0.0720912	0.178938	0.354407	0.286169	-0.18321	0.0944494	-0.249877	-0.229199	0.143318	0.250537	0.38033	0.429847	0.458338	0.453705
PE.32.1	0.263174	0.216766	0.1176	0.0368317	0.193699	0.124884	0.134677	0.179658	0.0617822	0.0288029	0.224362	0.175482	0.0866727	0.305095	0.12288	0.230987	-0.206745	0.157492	-0.0374437	0.502538	0.288593	-0.364524	0.191851	-0.0538974	0.22021	0.302466	0.134749	-0.0587699	0.229847	-0.0225263	-0.406265	-0.030087	-0.210093	0.115752	0.290333	-0.0249985	0.09967	0.122544	0.156976	-0.206589	0.134665	-0.233231	-0.167885	0.14261	0.1636	0.293381	0.289301	0.332265	0.315716
PE.32.2	0.0793999	0.0752355	0.0150015	0.0468167	0.0491929	-0.0250825	-0.0129253	0.020222	-0.0454365	-0.150831	-0.0532973	-0.0179418	0.0168857	0.168737	-0.0252145	0.12042	-0.135806	0.127609	-0.00314431	0.306259	0.175746	-0.122964	0.133549	0.111923	0.216334	0.336106	0.129997	-0.00375638	0.232619	-0.0714911	-0.260618	0.0185539	-0.123528	0.0372397	0.136526	-0.0621182	0.069535	0.107027	0.17895	-0.169325	0.0835644	-0.145503	-0.136382	0.111599	0.272751	0.0943414	0.185311	0.311779	0.18273
PE.33.0	0.0831803	0.0888329	-0.00548455	-0.00867687	0.0132613	-0.0539814	-0.0369877	0.0234863	-0.0418602	-0.0127693	-0.08036	-0.0575698	-0.0270147	0.143702	-0.0933573	0.0630063	-0.0843804	0.251953	-0.112871	0.172025	-0.0557216	0.125941	-0.0210861	0.132037	0.0934773	0.190063	0.0679628	0.123384	0.25721	-0.144062	-0.0191539	0.126661	0.0480288	0.0931293	0.0551575	-0.0265707	0.138566	0.142214	0.171161	-0.169361	-0.0657546	-0.108119	-0.0564176	0.108083	0.0242904	0.0357396	0.114743	0.213501	0.0814761
PE.33.1	0.219466	0.175686	0.121536	0.0463006	0.137858	0.125053	0.133129	0.279712	0.0351875	-0.029931	0.168809	0.23598	0.244524	0.329685	0.0653105	0.245617	-0.26279	0.216394	0.0522772	0.343882	0.211773	-0.233819	0.281524	-0.00189619	0.325713	0.316976	0.0872367	0.029967	0.273279	-0.080096	-0.374917	0.0630303	-0.0990099	0.122412	0.299754	-0.0412721	0.089589	0.18123	0.285004	-0.267555	0.214593	-0.183402	-0.173213	0.0945455	0.122976	0.306811	0.30093	0.363768	0.328389
PE.33.2	0.157252	0.0845965	0.124404	0.129229	0.0673747	0.134953	0.0957216	0.146043	-0.0326793	-0.00579658	0.171833	0.104302	0.186775	0.322556	0.0647465	0.259274	-0.271119	0.16252	0.0661146	0.202136	0.260342	-0.0728353	0.230183	0.190411	0.306655	0.319676	0.0366397	-0.0319472	0.18327	-0.134353	-0.316172	0.0892049	-0.0658026	0.0955656	0.334137	-0.0473687	0.153495	0.213933	0.319148	-0.290405	0.16468	-0.22363	-0.167765	0.24342	0.239976	0.283276	0.369985	0.408389	0.42201
PE.34.0	0.460366	0.350903	0.395416	0.355224	0.326193	0.466751	0.393207	0.363624	0.259946	0.0918452	0.370813	0.38231	0.27868	0.367921	0.494401	0.269247	-0.100774	0.0107891	0.0110051	0.0577138	0.100822	-0.180666	0.136946	0.12378	0.0655386	0.236952	0.132925	0.134485	0.0347315	0.0642304	-0.153411	0.103138	0.0740954	0.238884	0.197684	0.212289	0.227651	0.0254545	0.0510171	-0.182934	0.332805	-0.0734833	-0.0162016	0.305479	0.246193	0.50165	0.326505	0.300042	0.39616
PE.34.1	0.258446	0.225011	0.0972577	0.0155776	0.185851	0.140198	0.0216262	0.00591659	0.169109	0.0317912	0.106823	0.113903	0.189523	0.28366	0.0580978	0.0794119	-0.182586	0.14165	-0.0719832	0.238752	0.114227	-0.358044	0.089913	-0.138398	0.137138	0.0585419	-0.0529613	-0.222166	-0.019862	-0.154239	-0.533129	-0.201692	-0.250573	0.146307	0.336658	0.0285028	0.0486889	0.117204	0.171257	-0.177306	0.242448	-0.165233	-0.171389	-0.00417642	0.205917	0.35676	0.312703	0.326517	0.298626
PE.34.2	0.218062	0.166253	0.142814	0.162016	0.149751	0.180126	0.173549	0.172841	0.0323432	-0.0718032	0.2409	0.147843	0.334305	0.32456	0.187627	0.370849	-0.316844	0.147483	0.0642664	0.179058	0.180414	-0.198248	0.248317	0.146907	0.260198	0.33865	0.0515932	-0.0767717	0.0753315	-0.13523	-0.385923	-0.0259826	-0.0725353	0.0847405	0.3603	0.030123	0.225815	0.229907	0.233939	-0.231563	0.227831	-0.236256	-0.0649385	0.194311	0.359124	0.400216	0.365773	0.330513	0.428575
PE.34.3	0.206733	0.15574	0.134209	0.13961	0.151023	0.153735	0.132169	0.170165	-0.0116292	0.0245185	0.268371	0.177462	0.173441	0.382478	0.146715	0.275068	-0.24234	0.229235	0.0524692	0.287597	0.253717	-0.149763	0.263234	0.202724	0.314503	0.424962	0.0680468	0.019946	0.298974	-0.119244	-0.334245	0.0931773	-0.0692949	0.0648905	0.269415	-0.0178938	0.20402	0.271755	0.32486	-0.241224	0.177534	-0.274971	-0.157648	0.311491	0.334545	0.318608	0.452553	0.455938	0.469451
PE.34.4	0.254089	0.2355	0.119388	0.0831923	0.2042	0.101662	0.116784	0.263342	-0.0193579	0.0192619	0.190123	0.207657	-0.0248905	0.209577	0.108743	0.219022	-0.11742	0.264578	0.0443924	0.411701	0.347027	-0.0468047	0.193171	0.242052	0.190027	0.351275	0.233399	0.242904	0.461854	0.0565377	-0.0914491	0.241992	-0.0657666	0.0742754	0.183126	-0.0515572	0.163984	0.126145	0.178206	-0.126001	0.147243	-0.21859	-0.140678	0.3209	0.187663	0.173921	0.29589	0.306403	0.291041
PE.35.0	0.0131773	0.0609661	-0.0855326	-0.141626	0.00883288	-0.114443	-0.117684	-0.129013	0.0594779	-0.137642	-0.232295	-0.118368	0.0444764	-0.0888449	-0.188971	-0.288221	0.164668	0.0425083	-0.260366	-0.167141	-0.177114	0.116928	-0.175278	-0.142442	-0.126349	-0.139022	0.000216022	-0.0866007	-0.0769397	0.0117612	0.0220822	-0.030351	-0.0149175	-0.010117	-0.0707711	-0.0536934	-0.0397	-0.0806481	-0.106367	0.0243384	-0.049625	-0.0393879	-0.112211	-0.145203	-0.0863246	-0.125029	-0.219658	-0.0638344	-0.212001
PE.35.1	-0.293069	-0.146223	-0.356712	-0.313243	-0.128977	-0.388983	-0.404848	-0.485149	0.0641224	-0.130213	-0.414497	-0.397312	-0.0108971	-0.266859	-0.370165	-0.177882	0.0263906	-0.112751	-0.184926	-0.188323	-0.128737	0.441632	-0.301686	0.0437684	-0.26099	-0.122544	-0.0888209	0.0779118	0.0857846	0.0481248	0.442772	0.155632	0.0651305	-0.10159	-0.37595	-0.218878	-0.298422	-0.0972697	-0.10045	0.1155	-0.276196	0.0650705	0.149415	-0.0687189	-0.107243	-0.431839	-0.327261	-0.21529	-0.274371
PE.35.2	0.131617	0.100282	0.110963	0.099718	0.110231	0.122328	0.0911251	0.150207	-0.0363396	-0.0246745	0.21751	0.105791	0.133081	0.335254	0.019742	0.194407	-0.258746	0.202736	0.0416082	0.227975	0.25541	-0.161356	0.254233	0.116232	0.372481	0.292829	-0.0378878	-0.0964296	0.172925	-0.222082	-0.40456	-0.000324032	-0.108971	0.0613621	0.358152	-0.0518812	0.168821	0.323552	0.372985	-0.250633	0.14459	-0.27796	-0.235992	0.252385	0.21991	0.234671	0.359328	0.411473	0.426535
PE.35.3	-0.252325	-0.121836	-0.310819	-0.208893	-0.106895	-0.350063	-0.287981	-0.419874	-0.0380678	-0.195056	-0.242988	-0.312379	0.0169817	-0.17817	-0.24426	-0.0449085	-0.0949775	-0.0237024	-0.168317	-0.113891	-0.130489	0.492073	-0.305239	0.192175	-0.307363	0.0494569	-0.0529373	0.0814281	0.0953615	0.0743594	0.502022	0.145347	0.178014	-0.070387	-0.400648	-0.170945	-0.152115	-0.126529	-0.123912	0.140018	-0.430939	0.0664987	0.292769	-0.126313	-0.0594179	-0.44168	-0.331533	-0.286889	-0.297258
PE.35.4	0.164428	0.100222	0.122364	0.0736874	0.0573417	0.160132	0.0920972	0.290549	-0.000132013	-0.0474647	0.165845	0.163192	0.319916	0.331821	0.099586	0.325845	-0.161608	0.145851	0.0522892	0.165605	0.284392	-0.070459	0.257498	0.216862	0.265563	0.344362	0.132205	0.186427	0.312619	0.0138254	-0.165545	0.258458	0.0689469	0.110615	0.25961	-0.0342154	0.110867	0.199772	0.256826	-0.21883	0.294485	-0.182634	-0.0541014	0.25757	0.266439	0.38009	0.319412	0.355428	0.377522
PE.36.0	-0.174701	-0.162976	-0.0129733	-0.0523012	-0.181302	-0.0628143	-0.0109571	-0.0248185	-0.0553495	-0.128521	-0.124692	0.00337234	-0.0542934	-0.111143	0.0231383	0.00109211	0.0342514	0.0474287	0.0526133	-0.140426	-0.243816	0.0761596	0.0262586	-0.0681548	-0.0705431	-0.00312031	-0.0618662	0.0753315	-0.0210501	0.0069727	0.128773	-0.0471527	0.0994659	0.116796	0.00986499	0.019634	0.0966577	0.0924212	-0.049757	0.0465167	0.0824842	0.226835	-0.0554095	-0.00123612	-0.0158896	-0.0837204	-0.0494209	-0.0472487	-0.0139094
PE.36.1	0.354647	0.42243	0.0149415	-0.0608341	0.392739	0.0959256	-0.0914731	-0.0454125	0.292145	0.0775518	0.00552055	0.0916052	0.187039	0.174881	0.10465	0.00450045	-0.0106211	0.154575	-0.257546	0.157696	0.0956496	-0.252577	-0.0743954	-0.174521	0.124668	0.0222742	-0.131833	-0.229415	-0.0323432	-0.272835	-0.555728	-0.2039	-0.286229	0.009973	0.359028	-0.0588179	-0.00873687	0.0270147	0.13625	-0.262058	0.379046	-0.223678	-0.101818	0.242736	0.339946	0.396988	0.360072	0.396472	0.291977
PE.36.2	0.186019	0.170861	0.0816802	0.0740474	0.131113	0.102886	0.0143174	-0.0171857	0.159928	-0.0247585	0.0943054	0.060426	0.17991	0.322424	0.0629103	0.126817	-0.125401	0.181998	-0.0773477	0.188551	0.0977258	-0.245977	0.059574	-0.0507411	0.246721	0.0776598	-0.0369157	-0.266811	-0.0562136	-0.24264	-0.556964	-0.226571	-0.197132	0.0635464	0.384758	-0.00130813	0.0411881	0.132889	0.198044	-0.122484	0.212565	-0.130225	-0.254257	0.129109	0.372073	0.375602	0.425827	0.488605	0.394059
PE.36.3	0.0875488	-0.0394839	0.233495	0.324536	-0.0204981	0.221554	0.292937	0.26129	-0.151779	-0.039748	0.264542	0.235836	0.188131	0.245521	0.130453	0.394575	-0.211149	0.0367117	0.237324	0.0748275	0.139226	-0.0030003	0.384506	0.359256	0.205377	0.363528	-0.00440444	0.0920252	0.117348	-0.131245	-0.103666	0.0969217	0.0980498	0.0610501	0.208245	0.0671227	0.310075	0.415122	0.294353	-0.327645	0.1182	-0.14207	-0.0548935	0.256874	0.222994	0.228563	0.333753	0.239112	0.417678
PE.36.4	0.328989	0.259346	0.194191	0.107471	0.185959	0.202712	0.122736	0.144878	0.229991	0.0460726	0.124452	0.182178	0.0384278	0.275704	0.134797	0.0961416	-0.0946775	0.133369	-0.0763756	0.208149	0.0935614	-0.303354	-0.00266427	-0.0858566	0.0821242	-0.0106811	0.139274	0.0739994	0.145155	0.110951	-0.272619	0.0170297	-0.00478848	0.318716	0.200348	0.173441	0.107291	-0.0660066	0.0275188	0.000384038	0.315968	-0.0764716	-0.225059	0.0872847	0.143078	0.412949	0.27586	0.353375	0.235776
PE.36.5	0.219322	0.172037	0.166853	0.112403	0.161932	0.176094	0.168461	0.352619	-0.0264386	-0.0288149	0.256106	0.248005	0.111059	0.360072	0.0959616	0.28312	-0.217222	0.274755	0.0677588	0.400732	0.33739	-0.216982	0.332277	0.198884	0.335998	0.448305	0.224302	0.262634	0.582802	0.0441644	-0.244392	0.317996	-0.0273147	0.1558	0.242148	0.00273627	0.224266	0.204776	0.290969	-0.196796	0.221998	-0.267267	-0.290537	0.358668	0.214941	0.370885	0.421986	0.495434	0.446721
PE.36.6	0.15622	0.17517	0.030015	-0.00547255	0.14195	0.0411881	0.029631	0.203312	0.0871647	-0.0146175	0.0625022	0.102778	0.107855	0.204344	0.0535854	0.199064	-0.147507	0.174977	-0.0148695	0.347267	0.280564	-0.0867207	0.232259	0.235692	0.195404	0.408029	0.260726	0.276364	0.473447	0.127777	-0.107915	0.399268	-0.0793519	0.102274	0.173333	-0.0748995	0.127897	0.116856	0.133681	-0.0947855	0.135494	-0.30201	-0.0693429	0.350795	0.271131	0.20018	0.218722	0.352271	0.296166
PE.37.2	0.0760876	0.12432	-0.0382718	-0.049781	0.108755	-0.0159376	-0.03976	-0.0991659	-0.0130693	-0.0868167	0.0361716	-0.0666067	-0.0654785	0.0375638	-0.0691389	-0.0232103	-0.10039	0.147507	-0.126637	0.188251	0.276724	-0.219346	-0.0249985	-0.0823522	0.2439	-0.0288629	-0.108659	-0.228419	-0.00154816	-0.26195	-0.447441	-0.190471	-0.191755	-0.0759556	0.28306	-0.0443204	-0.0448965	0.0906091	0.159364	-0.222106	0.127033	-0.225599	-0.209145	0.23718	0.130621	0.120372	0.180438	0.322748	0.221158
PE.37.3	0.121224	0.090273	-0.0408761	-0.0318872	0.0642544	0.0348755	0.0552895	0.0882088	-0.0347315	-0.161416	0.194683	0.0354275	0.231515	0.315116	0.0159496	0.23658	-0.222718	0.110195	0.0476448	0.15982	0.221038	-0.176478	0.205041	0.103294	0.162892	0.162952	0.0481008	-0.0219502	0.0334473	-0.0158176	-0.204536	0.00912091	-0.0721752	0.0336034	0.228011	0.0860006	0.174581	0.228227	0.2391	-0.0885449	0.208365	-0.241896	-0.0318152	0.115896	0.214941	0.280972	0.205785	0.149331	0.236376
PE.37.4	-0.151887	-0.0124332	-0.264902	-0.22141	-0.0515692	-0.267963	-0.232787	-0.223354	0.0351515	-0.161272	-0.182058	-0.25799	0.0536094	-0.0818842	-0.177666	-0.0361836	-0.0270627	-0.040012	-0.116136	-0.0532973	-0.0139574	0.41865	-0.278416	0.166613	-0.227579	0.030423	0.0293909	0.305791	0.292769	0.258026	0.543858	0.326697	0.224134	0.00866487	-0.408473	-0.0730873	-0.0878008	-0.207861	-0.113411	0.15922	-0.194095	0.0175458	0.361896	-0.105503	-0.0855566	-0.362928	-0.274419	-0.210489	-0.246385
PE.37.5	0.228371	0.194107	0.12078	0.0909451	0.152859	0.147627	0.150807	0.28276	0.0347555	0.00183618	0.115476	0.132265	0.229031	0.232211	0.105239	0.303486	-0.00589259	0.233015	-0.0250585	0.235608	0.205329	-0.210237	0.168497	0.123312	0.182634	0.242136	0.101542	0.138602	0.166949	0.0406361	-0.11676	0.145191	-0.0508491	0.0848605	0.122868	-0.0232463	0.110843	0.07964	0.223774	-0.187843	0.101182	-0.216598	-0.137462	0.174509	0.00874887	0.0775878	0.106535	0.206685	0.199208
PE.37.6	-0.0432043	-0.0171017	-0.119976	-0.13655	-0.0770477	-0.090093	-0.117012	0.100462	0.030267	-0.0785479	-0.0666547	-0.0254305	0.0506931	0.203552	-0.151395	0.196424	-0.104674	0.0708911	0.0436124	0.16024	0.138062	0.0446565	0.089673	0.139334	0.264518	0.210177	0.237756	0.233747	0.387339	0.0712151	-0.070471	0.4012	0.0592259	0.135926	0.210453	-0.0384278	0.0862646	0.149067	0.228395	-0.00475247	0.214017	-0.0829883	-0.252949	0.177918	0.133177	0.229427	0.215806	0.409817	0.281248
PE.38.1	0.199172	0.145431	0.160792	0.108947	0.122712	0.210897	0.117948	0.139586	0.04024	0.0909931	0.107903	0.165353	0.124452	0.285737	0.145899	0.224674	-0.139826	0.0673747	0.0878368	0.128413	0.111527	-0.210057	0.300066	0.0965737	0.229895	0.244788	0.070483	-0.020162	0.000540054	-0.0237984	-0.371293	-0.0275188	-0.0584218	0.152667	0.354083	0.165821	0.17937	0.192127	0.289757	-0.264854	0.405749	-0.16312	-0.203516	0.22393	0.327333	0.366121	0.415962	0.369409	0.419862
PE.38.2	0.334473	0.37895	0.0978698	0.0809601	0.322652	0.192019	0.0731953	0.0472487	0.180354	0.0427123	0.110075	0.188899	0.0461926	0.0646745	0.151131	-0.0186979	-0.0660186	0.0647465	-0.136886	0.118284	0.196628	-0.246589	-0.0236424	-0.0670147	0.0837204	0.0637504	-0.0162736	-0.179694	-0.00832883	-0.164068	-0.413129	-0.0875968	-0.151083	-0.0683828	0.303858	0.0192379	0.0940534	-0.0421482	0.132397	-0.272943	0.229751	-0.211257	0.00788479	0.29667	0.209685	0.273063	0.19526	0.219826	0.188143
PE.38.3	0.300642	0.214641	0.222742	0.188143	0.187255	0.27934	0.250213	0.369577	0.0120252	-0.0148335	0.27526	0.311755	-0.0314911	0.317828	0.22087	0.268083	-0.19904	0.153231	0.129409	0.290153	0.333345	-0.203468	0.323408	0.172781	0.386307	0.307699	0.301758	0.059622	0.199724	-0.0687309	-0.421338	0.0882568	-0.0171857	0.157252	0.413813	0.177066	0.267171	0.275212	0.300438	-0.299538	0.397528	-0.121404	-0.305875	0.2827	0.343978	0.548623	0.509151	0.450717	0.49655
PE.38.4	0.34405	0.18141	0.414797	0.373057	0.175626	0.434815	0.415422	0.642544	-0.0673627	0.0733633	0.472907	0.438848	0.0488689	0.461014	0.329937	0.349271	-0.1952	0.138134	0.251257	0.283228	0.35514	-0.172709	0.466067	0.356868	0.39718	0.429847	0.313351	0.357372	0.371893	0.0894809	-0.214401	0.268167	0.172301	0.288713	0.327525	0.265239	0.395212	0.364488	0.321536	-0.273051	0.42099	-0.191047	-0.281344	0.363096	0.287333	0.581146	0.627675	0.545887	0.634095
PE.38.5	0.230915	0.195428	0.131509	0.0888689	0.0877528	0.142994	0.133849	0.149019	0.193807	-0.0383318	0.0650585	0.129061	0.0770357	0.209241	0.0618782	0.060342	-0.00860486	0.103762	-0.0266187	0.163972	0.049757	-0.172013	-0.0478848	-0.080072	0.0876928	-0.0569577	0.120372	0.0455686	0.0192979	0.195104	-0.139658	-0.0339394	0.0861446	0.378806	0.108191	0.261914	0.0987579	-0.0926253	0.0517252	0.0967417	0.137282	0.11736	-0.206757	-0.0214581	0.0516532	0.191911	0.121896	0.232835	0.117792
PE.38.6	0.230231	0.233711	0.0375518	-0.0711431	0.124956	0.0979898	0.00454845	-0.00873687	0.237348	0.0841884	-0.00940894	0.0317312	-0.0589379	0.11526	-0.0289109	-0.069739	-0.00518452	0.172865	-0.138266	0.108143	0.138734	-0.234719	-0.0726073	-0.12084	0.114083	-0.152295	0.198056	0.040072	0.102142	0.108323	-0.251461	0.146559	-0.0327633	0.246205	0.142682	0.152307	-0.0290189	-0.191431	-0.0457366	0.0865647	0.332589	-0.0321512	-0.214629	0.040048	0.0232943	0.285245	0.0759316	0.248773	0.0546655
PE.38.7	-0.149295	-0.0725833	-0.16282	-0.122868	-0.0727393	-0.155836	-0.160672	-0.156496	0.030195	-0.147063	-0.139358	-0.148503	0.0219502	-0.0255025	-0.189043	-0.0322472	-0.0323552	0.0879088	-0.0688509	-0.16432	0.0432403	0.472355	-0.152427	0.282316	-0.184674	0.11646	0.133729	0.371281	0.299322	0.245653	0.435656	0.481764	0.26225	0.0837204	-0.19952	-0.00384038	0.0538374	-0.0708791	-0.0286109	0.0442724	-0.131629	-0.0763876	0.137834	0.0687309	0.00231623	-0.180762	-0.156352	-0.0938614	-0.0857126
PE.39.4	0.0162736	0.0526013	-0.0993819	-0.0682028	0.0264626	-0.0681428	-0.115932	0.0954695	0.0245545	-0.0589019	-0.000636064	-0.0838764	-0.0464926	0.0489289	0.0120732	-0.0236664	-0.0914011	0.00168017	-0.0186139	0.131005	0.204668	0.0676988	0.0517372	0.0269787	0.153303	0.0331113	0.0545935	0.145467	0.161464	0.132577	-0.0333393	0.141578	-0.0758356	0.0876928	0.16192	0.0157816	0.128797	-0.0136694	0.0267747	-0.0909331	0.232019	-0.132613	-0.112547	-0.0890129	0.148455	0.145839	0.187279	0.154743	0.139346
PE.39.6	0.143942	0.130873	0.11868	0.0616982	0.0873327	0.156856	0.142598	0.323708	-0.0215662	-0.040024	0.172841	0.215038	0.288545	0.230951	0.0558176	0.308095	-0.114911	0.0711191	0.0835764	0.131701	0.255026	-0.0737594	0.221098	0.156508	0.339358	0.261914	0.18075	0.223438	0.34429	0.0374797	-0.155908	0.343438	0.0245545	0.109715	0.310783	0.0535014	0.161932	0.151983	0.173669	-0.0892409	0.368857	-0.184938	-0.0689709	0.232271	0.168341	0.288257	0.192139	0.321752	0.272091
PE.40.4	0.508875	0.448341	0.334905	0.228791	0.392199	0.37553	0.346343	0.365737	0.271179	0.125401	0.362832	0.360504	-0.0531653	0.241656	0.412913	0.24162	-0.113351	0.192379	-0.165317	0.298014	0.173585	-0.189247	0.0186019	0.0224662	0.147519	0.187459	0.262598	0.134053	0.211329	0.136106	-0.243816	0.080156	-0.03952	0.335194	0.329637	0.245569	0.304458	-0.11976	-0.00268827	-0.148911	0.269967	-0.0756916	-0.0626463	0.243024	0.150411	0.417342	0.352007	0.438848	0.32036
PE.40.5	0.236448	0.151023	0.203528	0.176226	0.0964296	0.227291	0.316268	0.430783	0.0256826	-0.00316832	0.308935	0.334581	0.0870687	0.226451	0.277324	0.208605	-0.050477	0.156172	-0.0315872	0.360816	0.248557	-0.204308	0.282112	0.0652265	0.296526	0.328233	0.223174	0.138506	0.231371	0.15802	-0.127837	0.128101	0.0544734	0.0591419	0.317084	0.0730633	0.238308	0.0630063	0.0354635	-0.123684	0.237648	-0.139214	-0.0447645	0.235704	0.177822	0.325449	0.212829	0.230651	0.28402
PE.40.6	0.2039	0.184566	0.069595	-0.0172817	0.110771	0.133981	0.0766757	0.257606	0.105551	0.101926	0.153987	0.185323	-0.0765317	0.267087	0.069595	0.0631983	-0.0447165	0.142526	0.00169217	0.293261	0.264722	-0.27988	0.204824	0.0774077	0.357384	0.2	0.337858	0.236664	0.342082	0.117324	-0.266727	0.291269	-0.0126133	0.237216	0.25835	0.105803	0.165965	0.105167	0.116388	0.08036	0.407981	-0.152667	-0.335638	0.287825	0.25703	0.420438	0.357684	0.468791	0.328509
PE.40.7	0.121968	0.113279	0.100882	0.0322592	0.0578578	0.168749	0.0817042	0.0809961	0.137054	0.00483648	0.0314791	0.125461	0.0477168	0.159556	0.0349595	0.0360396	-0.0612901	0.201368	0.0271107	-0.020054	0.13751	-0.0472967	0.0508011	0.0481608	0.185863	-0.0510051	0.134845	0.14219	0.15862	0.0290069	-0.167633	0.22297	0.0542574	0.241236	0.254401	0.18297	0.10105	-0.0274587	0.0586859	-0.0231143	0.295734	-0.0318752	-0.216046	0.150879	0.104938	0.254437	0.148191	0.268275	0.169685
PE.40.8	0.113867	0.0726433	0.155068	0.133309	0.0548935	0.191599	0.188767	0.349595	-0.0523612	-0.0680228	0.187567	0.234875	0.27772	0.394863	0.0976178	0.42279	-0.230603	0.169925	0.207561	0.130573	0.218962	-0.0441524	0.344758	0.248365	0.315836	0.390279	0.107231	0.211929	0.348215	-0.00720072	-0.191131	0.346727	0.0494569	0.250765	0.372937	0.126181	0.356364	0.289313	0.306319	-0.241248	0.311419	-0.257558	-0.161788	0.339058	0.266979	0.377798	0.365305	0.374641	0.449709
PE.42.10	-0.0427483	-0.0332073	0.0180978	0.0506211	0.0020162	-0.0157816	0.0148935	0.100738	-0.0672067	-0.0508011	0.00225623	0.00386439	0.0662586	0.10273	-0.0354275	0.11598	-0.00993699	0.0583018	0.090429	0.0428563	0.0316712	0.364452	0.0240144	0.270807	-0.0185059	0.265443	0.0938854	0.419958	0.466211	0.205821	0.341278	0.433063	0.239208	0.124416	-0.108011	0.0466007	0.0945335	-0.0366877	0.0176298	0.0345635	-0.115272	-0.105455	0.120408	0.0259826	-0.0409721	-0.0856406	0.00579658	0.00693669	-0.0321512
PE.42.8	-0.0913651	-0.0969937	0.0462286	0.0972697	-0.0523972	0.0474047	0.115476	0.236592	-0.277672	-0.206421	0.0737594	0.0942214	0.111239	0.0060246	-0.0263306	0.195272	-0.226751	0.0465647	0.18225	-0.0819802	0.0983738	0.216394	0.171329	0.340066	0.266331	0.241044	0.0182418	0.159964	0.0949775	-0.0808281	-0.0484608	0.289613	0.196988	0.0218422	0.286793	0.130993	0.235488	0.14303	0.179358	-0.364164	0.259634	-0.0907171	-0.0807441	0.159508	0.00523252	0.153447	0.111251	0.139142	0.173801
Plasmenyl.PC.24.0	0.0291149	-0.039772	0.247945	0.288905	-0.0163696	0.207609	0.315356	0.444428	-0.206985	0.0079808	0.390423	0.304806	0.125053	0.421086	0.193135	0.466619	-0.31694	0.188731	0.342754	0.158488	0.164512	0.174617	0.487801	0.49667	0.229043	0.653777	0.219982	0.41529	0.407993	0.166097	0.123276	0.412793	0.183534	0.174929	0.263558	0.192907	0.49517	0.45967	0.28078	-0.32402	0.00187219	-0.166385	-0.0377798	0.222826	0.158548	0.119736	0.321764	0.187099	0.407729
Plasmenyl.PC.30.0	0.115548	0.115572	-0.105791	-0.132181	0.0524572	-0.0417282	-0.0918092	0.00834083	0.0991419	0.0220702	0.0649265	0.0976418	0.0272667	0.0808161	-0.0244824	0.118308	-0.080132	0.168533	-0.20306	0.228635	0.127213	-0.242616	-0.0185779	-0.234947	0.274551	-0.0573297	0.020462	-0.242172	-0.0218542	-0.113075	-0.486385	-0.179202	-0.349547	-0.0239064	0.433831	-0.069727	-0.00446445	0.0922172	0.104314	-0.142514	0.30297	-0.228047	-0.123984	0.113591	0.170525	0.352487	0.261398	0.397096	0.244788
Plasmenyl.PC.32.0	-0.104386	-0.0238104	-0.0747675	-0.0280828	-0.0929853	-0.0644584	-0.10261	-0.0360996	0.0929373	-0.116808	0.0408521	-0.152643	-0.0408761	0.210501	-0.0838644	-0.0294029	-0.131437	-0.0705311	-0.0191059	0.0930933	0.238344	0.108611	-0.0450285	0.0753915	0.0974497	-0.029583	0.125905	0.029715	0.030075	0.0819442	0.0550855	0.0256826	0.0370837	-0.069727	-0.0884368	-0.0409241	-0.146739	-0.0839604	0.0243384	0.270435	-0.0272187	-0.173525	0.0911011	-0.0884008	0.127189	-0.00868887	-0.060114	0.0232703	-0.0690909
Plasmenyl.PC.32.1	-0.166085	-0.205209	-0.0040324	0.0451245	-0.174017	-0.0271107	0.0317912	0.0020282	-0.199868	-0.0719712	0.0673147	-0.136466	0.0205461	0.105107	-0.163384	0.0674227	-0.193219	-0.0437204	0.123084	-0.220594	-0.079544	0.173513	0.0670507	0.290657	-0.0589379	0.0567057	-0.0781398	0.0810921	-0.0361716	-0.193555	0.0376838	0.0775518	0.195476	-0.0672787	0.0654305	-0.00760876	-0.0490129	0.239472	0.290717	-0.123132	-0.173309	0.0419562	0.109235	-0.0644584	7.20072e-05	-0.105215	-0.00255626	-0.0155416	0.0575218
Plasmenyl.PC.32.2	0.0132493	-0.00225623	0.0176058	0.0185899	-0.0540654	0.0328233	0.0371917	0.139346	-0.122172	-0.0592259	0.101002	0.0818962	0.0364596	0.179358	0.0466367	0.0720912	-0.145359	0.27544	-0.0854725	0.124248	0.0832883	-0.0735434	0.21577	0.0855806	0.358416	0.0926373	-0.0591779	-0.0487969	0.13523	-0.220414	-0.386019	-0.0230543	-0.146283	0.029703	0.411173	-0.070195	0.136898	0.240744	0.257678	-0.357108	0.196916	-0.133657	-0.171845	0.187987	0.25949	0.190075	0.280972	0.306751	0.270963
Plasmenyl.PC.34.0	-0.0327873	-0.0743234	0.173657	0.237984	-0.0861806	0.178494	0.192175	0.231635	-0.0506451	0.0255506	0.36486	0.0481488	0.146247	0.56276	0.125449	0.332313	-0.291725	0.0188419	0.229655	0.107207	0.251677	0.174089	0.324668	0.511875	0.267663	0.466943	0.262886	0.369001	0.265467	0.204872	0.0851845	0.296538	0.294581	0.259826	0.1233	0.241056	0.2391	0.2839	0.335494	-0.00160816	0.0218182	-0.195392	-0.0136814	0.102322	0.305767	0.146943	0.272187	0.285281	0.315332
Plasmenyl.PC.34.1	-0.131329	-0.163816	-0.00417642	0.105071	-0.163336	-0.00555656	0.0726193	0.130549	-0.281248	-0.102334	0.198308	-0.0271827	0.196712	0.117024	-0.0150255	0.270327	-0.26021	0.0914011	0.207201	-0.147267	0.14147	0.258458	0.233027	0.455326	0.0821482	0.311215	-0.0238824	0.202328	0.130501	0.0181458	0.0622862	0.187795	0.208641	-0.0830003	0.0672547	-0.0357636	0.108515	0.232019	0.231563	-0.0721392	-0.0289589	0.0787519	0.000888089	-0.0176658	0.113615	-0.0522412	0.090021	-0.0292229	0.0987459
Plasmenyl.PC.34.2	-0.128857	-0.139274	-0.0433123	0.0683588	-0.107279	-0.0307711	0.0340594	0.21703	-0.325257	-0.0591299	0.214269	-0.0563816	0.0682988	0.132985	-0.0473927	0.289421	-0.229979	0.0786559	0.348035	-0.0965016	0.171953	0.377126	0.29937	0.592283	0.221374	0.454797	0.131449	0.336646	0.295806	0.125929	0.11568	0.419106	0.260834	0.0182418	0.00132013	0.0757036	0.220234	0.308227	0.380618	-0.172397	0.0364236	0.0128293	0.116616	0.0789199	0.17811	0.0413321	0.214269	0.104698	0.245953
Plasmenyl.PC.34.3	-0.301122	-0.27616	-0.147279	-0.0551335	-0.337402	-0.221362	-0.116292	0.029703	-0.260966	-0.18393	-0.0210741	-0.150495	0.166841	0.1215	-0.191671	0.248629	-0.206865	0.0616382	0.183246	0.0489169	0.0512091	0.344074	0.224122	0.330021	0.0586859	0.236496	0.113255	0.197756	0.262706	0.00579658	0.134653	0.215662	0.164932	-0.150639	-0.0593099	-0.104374	-0.0607261	0.278908	0.272967	-0.0623582	-0.0851125	0.0556736	0.079844	-0.0580618	0.0794959	-0.151491	0.0375998	0.0435884	0.080228
Plasmenyl.PC.35.1	0.175794	0.13661	0.0879688	0.0467927	0.0672187	0.138278	0.0390039	0.113891	0.0820162	0.100618	0.0767477	0.0564776	0.069931	0.27796	0.0810201	0.198896	-0.119832	0.150459	-0.0493609	0.149715	0.124164	-0.161032	0.0952895	-0.0438884	0.294665	0.119436	0.0479568	-0.125233	-0.00532853	-0.090045	-0.417606	-0.069967	-0.290405	0.195092	0.487345	0.0943414	0.223414	0.195584	0.227555	-0.162916	0.283084	-0.147579	-0.184218	0.159532	0.336946	0.433027	0.46213	0.495602	0.432607
Plasmenyl.PC.35.2	-0.334257	-0.250537	-0.2018	-0.0908491	-0.219622	-0.229559	-0.163528	-0.230531	-0.218662	-0.0612901	-0.100486	-0.329325	0.108671	-0.123888	-0.230723	-0.0157816	-0.0694389	-0.0969577	0.108347	-0.229943	0.0259226	0.611917	-0.127129	0.353699	-0.129073	0.0582658	-0.0379958	0.206925	0.11574	-0.00548455	0.515668	0.264554	0.243528	-0.115416	-0.304314	-0.0626223	-0.140006	0.0755476	0.00878488	0.0786439	-0.406277	0.1621	0.344458	-0.15508	-0.129145	-0.444068	-0.314071	-0.34297	-0.267219
Plasmenyl.PC.35.3	0.166877	0.0949055	0.136742	0.158236	0.079952	0.193939	0.189883	0.182454	-0.0797	0.0447885	0.155956	0.15688	0.0243864	0.115236	0.0829883	0.177858	-0.110879	0.0609061	0.196892	-0.0513051	0.194323	0.0288869	0.115884	0.227279	0.166337	0.0920612	0.133489	0.249973	0.268671	-0.0186979	0.0233663	0.272535	0.159472	-0.0262346	0.060462	0.0365437	0.069931	0.153819	0.265359	-0.155572	0.248245	0.0281908	-0.0976178	0.230003	0.121164	0.157756	0.20486	0.200576	0.221338
Plasmenyl.PC.36.1	0.103234	0.0755356	0.178842	0.230255	0.0732313	0.177726	0.241464	0.358932	-0.170441	-0.0630783	0.292361	0.180378	0.0763996	0.256802	0.126505	0.29625	-0.256994	0.190135	0.0622022	0.108119	0.200156	0.117132	0.265131	0.433267	0.338698	0.545911	0.123684	0.285605	0.310867	-0.0310471	-0.0963816	0.258914	0.166625	0.0845965	0.323396	0.0740114	0.297558	0.336994	0.2764	-0.225251	0.0748395	-0.141254	0.00943294	0.268935	0.214881	0.105623	0.257894	0.340426	0.325521
Plasmenyl.PC.36.2	-0.089577	-0.059778	-0.0427963	-0.0408761	-0.0959616	-0.0316832	0.0305071	-0.00194419	-0.0106451	0.120336	0.232247	-0.0462046	0.144038	0.409781	-0.0132613	0.121896	-0.0865407	0.0108011	0.141314	0.193111	0.229895	0.190927	0.0481848	0.213513	0.22141	0.204428	0.162688	0.150687	0.162616	0.181038	0.0752235	0.131209	0.151635	0.152799	0.120468	0.153855	0.0117732	0.179058	0.146535	0.219454	-0.0757636	0.0465287	-0.0728713	0.0178698	0.148167	-0.0519892	0.0865647	0.143966	0.124236
Plasmenyl.PC.36.3	0.0358116	-0.00679268	0.126277	0.15784	-0.0779118	0.148107	0.159748	0.22141	-0.0352235	0.0690549	0.229475	0.117672	0.00837684	0.272463	0.171725	0.183078	-0.133285	0.0545335	0.148503	0.0529013	0.113975	0.19796	0.114407	0.339214	0.0885209	0.185263	0.374041	0.460342	0.317912	0.375398	0.242376	0.347807	0.264974	0.229235	0.00463246	0.200768	0.143534	0.0438284	0.0454125	0.180138	0.138386	0.0975338	-0.216094	0.0646505	0.0952535	0.113807	0.21619	0.24486	0.185515
Plasmenyl.PC.36.4	-0.0254785	-0.0667507	0.10471	0.104398	-0.130957	0.0989979	0.101122	0.22363	-0.0971497	0.0238104	0.169169	0.030111	-0.0750075	0.243396	0.0881128	0.212757	-0.119928	0.135542	0.155668	0.0206061	-0.00535254	0.205401	0.151623	0.332025	0.0640864	0.198812	0.390663	0.485677	0.32114	0.391887	0.219298	0.423546	0.191827	0.292649	0.0269787	0.276112	0.22129	0.111791	0.0959616	0.0559856	0.174677	0.0544854	-0.177918	0.0325233	0.106043	0.154227	0.286841	0.296214	0.268659
Plasmenyl.PC.36.5	0.0705191	0.0390759	0.163768	0.0927933	0.0579058	0.212733	0.135422	0.293417	-0.127921	0.100822	0.241908	0.203312	0.0976418	0.196304	0.154251	0.0328833	-0.0567897	0.0868887	0.140402	0.0932613	0.232955	-0.186631	0.280912	0.0748995	0.266607	0.280312	0.0953255	0.089997	0.263354	-0.0174977	-0.216646	0.0943534	0.126625	-0.0417282	0.279592	-0.0141614	0.132733	0.267855	0.270951	-0.141842	0.189199	-0.112667	-0.176154	0.331281	0.225359	0.290681	0.366001	0.252445	0.341086
Plasmenyl.PC.36.6	-0.159868	-0.31658	0.107735	0.13685	-0.362808	0.060438	0.175722	0.34045	-0.425527	-0.246097	0.201212	0.0622262	0.070327	0.189991	-0.0836004	0.267231	-0.254485	-0.00766877	0.333405	0.0282868	0.250849	0.0378158	0.443936	0.328425	0.348599	0.188827	0.101218	0.148131	0.287933	-0.0520612	-0.0719472	0.232847	0.185203	0.101434	0.135182	0.00876088	0.149163	0.412073	0.318572	-0.138398	0.153387	0.0887369	-0.101254	0.089541	0.0890849	0.188251	0.286229	0.241788	0.323852
Plasmenyl.PC.37.0	-0.0427963	-0.257366	0.397156	0.429259	-0.212277	0.361656	0.344758	0.429055	-0.250345	0.103666	0.278392	0.163108	0.070195	0.290381	0.166937	0.208641	-0.00842484	-0.0933573	0.503954	-0.0743594	0.119784	0.0723552	0.435092	0.413717	0.138854	0.253753	0.138614	0.34045	0.0765797	0.0907051	0.0812841	0.243072	0.248269	0.164104	0.152703	0.241404	0.196352	0.410345	0.130225	-0.0371437	0.266439	0.0524812	-0.0420882	0.040288	0.298662	0.289157	0.410873	0.195152	0.420738
Plasmenyl.PC.37.1	0.099706	0.030327	0.153627	0.0707951	0.0129373	0.184458	0.108935	0.272991	-0.0467447	0.0287309	0.156424	0.154143	-0.00890489	0.327933	0.080156	0.160324	-0.0554095	0.19982	0.0429163	0.202736	0.112427	-0.328017	0.292301	-0.05955	0.517528	0.135998	-0.0122652	-0.192643	0.0244224	-0.214689	-0.574653	-0.100366	-0.251581	0.0930093	0.608341	0.0774077	0.213501	0.338506	0.403408	-0.275152	0.335074	-0.185467	-0.354023	0.28282	0.178878	0.481572	0.538218	0.535146	0.532433
Plasmenyl.PC.37.2	-0.0168737	-0.080264	0.0584818	0.0705311	-0.101806	0.0405761	0.0219022	0.208077	-0.201464	-0.0259106	0.208713	0.0149175	0.248497	0.25859	-0.0125653	0.291545	-0.202664	0.0241584	0.247285	0.0649025	0.241356	0.101566	0.369457	0.224518	0.144542	0.226199	0.00571257	0.0753675	0.157864	-0.0171257	-0.126193	0.0874167	-0.0283948	0.0559856	0.0970297	0.0293669	0.193591	0.343834	0.418194	-0.156544	0.049853	-0.0988059	-0.111587	0.157408	0.106415	0.166301	0.360348	0.252481	0.422358
Plasmenyl.PC.37.3	0.0760636	-0.0586379	0.278224	0.286433	-0.0479088	0.312715	0.313399	0.455446	-0.0961416	0.049661	0.426235	0.337462	0.163816	0.405881	0.291293	0.448113	-0.0849085	0.0740114	0.296574	0.0779718	0.144662	0.152331	0.262034	0.326565	0.22015	0.279568	0.120456	0.228815	0.149067	0.0969937	0.0625022	0.197972	0.232751	0.25955	0.112043	0.234311	0.271407	0.190495	0.234683	-0.228983	0.180846	0.0512091	-0.186199	0.260294	0.226499	0.404092	0.485653	0.326781	0.534581
Plasmenyl.PC.37.4	-0.00879688	-0.0362916	0.0769517	0.0337714	-0.109127	0.125521	0.0490609	0.195368	-0.0882208	-0.0122892	0.152391	0.0993099	0.142418	0.218722	0.0735674	0.198968	-0.142706	0.224662	0.0749715	0.0050405	0.190819	-0.0571737	0.287669	0.0659586	0.442484	0.0809121	-0.059898	-0.0836244	0.103654	-0.175602	-0.399052	-0.00853285	-0.232259	0.0293429	0.515428	-0.0672307	0.125485	0.369757	0.344986	-0.231323	0.338002	-0.0682988	-0.184038	0.265335	0.175602	0.320384	0.357996	0.390903	0.401116
Plasmenyl.PC.37.6	0.0890009	-0.0432043	0.24228	0.225383	-0.0462286	0.240564	0.252301	0.430555	-0.243012	0.0248065	0.308683	0.253489	-0.010465	0.342718	0.123144	0.412949	-0.357324	0.0681188	0.285965	0.0905851	0.349235	0.168113	0.47904	0.573261	0.169133	0.490285	0.419406	0.563444	0.581422	0.280144	0.0972097	0.613369	0.23532	0.281188	0.190039	0.168653	0.318152	0.321992	0.347675	-0.213693	0.243372	-0.0791959	-0.244632	0.285389	0.112007	0.306199	0.409937	0.35886	0.442904
Plasmenyl.PC.38.1	0.247945	0.342958	0.0639664	0.069607	0.338026	0.128845	0.103822	0.172889	0.193279	0.0509811	0.192991	0.170645	0.00562856	0.281968	0.263114	0.152739	0.0039484	0.145719	-0.0568137	0.0428803	-0.0232943	0.11772	0.04006	0.283888	0.175962	0.360708	0.101566	0.295434	0.332577	0.0258506	-0.0249385	0.31952	0.059622	0.108587	0.201704	0.116256	0.265227	0.169565	0.171233	-0.133585	0.153087	-0.160108	0.0478008	0.279604	0.256934	0.181554	0.244824	0.283948	0.285353
Plasmenyl.PC.38.3	0.199712	0.0317672	0.379034	0.406157	0.0267387	0.399544	0.384542	0.588035	-0.136826	0.100078	0.488161	0.318296	0.142034	0.509211	0.330729	0.338638	-0.249517	0.0484969	0.317552	0.235164	0.39688	0.195668	0.472859	0.578854	0.319784	0.557564	0.359928	0.507219	0.377762	0.276292	0.115512	0.375506	0.298914	0.252049	0.207525	0.251881	0.30459	0.364344	0.302778	-0.118524	0.224278	-0.0411521	-0.116592	0.228455	0.316796	0.335338	0.47568	0.398296	0.476196
Plasmenyl.PC.38.4	0.0792679	-0.04024	0.272295	0.347087	-0.0272187	0.333093	0.317672	0.434995	-0.12012	0.168281	0.397828	0.181662	0.139838	0.332961	0.21895	0.299238	-0.157408	-0.0520612	0.266151	-0.0766877	0.138314	0.229091	0.339514	0.619886	0.105743	0.349499	0.250669	0.527633	0.295974	0.222586	0.254809	0.450261	0.390843	0.197804	0.0708671	0.227747	0.242652	0.260906	0.248989	0.00567657	0.210213	0.0191659	-0.079688	0.147639	0.170081	0.252457	0.428203	0.272343	0.377498
Plasmenyl.PC.38.5	0.116928	0.0211461	0.273423	0.252805	0.0211461	0.304338	0.278596	0.470195	-0.151491	0.0880648	0.340018	0.287813	0.00216022	0.363876	0.170129	0.289733	-0.266463	0.189991	0.224242	0.130549	0.294065	0.0661146	0.470675	0.538194	0.289733	0.56072	0.413141	0.625815	0.581086	0.216958	0.0472487	0.639124	0.214533	0.241188	0.270495	0.160396	0.360012	0.344602	0.261194	-0.138374	0.345815	-0.173273	-0.214449	0.296346	0.20288	0.314227	0.388491	0.39712	0.409097
Plasmenyl.PC.38.6	0.0665467	0.00673267	0.128149	0.125593	-0.0109691	0.167297	0.151503	0.350003	-0.099766	0.0706871	0.217042	0.180174	-0.0813321	0.246541	0.0745875	0.290093	-0.244584	0.228743	0.183258	0.0929613	0.210345	0.121776	0.330813	0.453225	0.246937	0.477864	0.402604	0.581242	0.553711	0.270495	0.0519292	0.650213	0.158836	0.243228	0.233075	0.116988	0.315296	0.251545	0.188239	-0.0535614	0.279628	-0.111575	-0.218758	0.2788	0.167285	0.270543	0.333273	0.374521	0.368593
Plasmenyl.PC.39.3	-0.0709871	-0.134821	0.0416082	0.109271	-0.12414	0.0567537	0.0690549	0.304854	-0.202964	-0.160648	0.194599	0.0620222	0.0522652	0.229439	-0.0133093	0.374893	-0.230051	0.0863366	0.310819	-0.0148455	0.17991	0.260774	0.292625	0.420102	0.198704	0.379082	0.138326	0.257042	0.26279	0.030423	0.029727	0.269475	0.159988	0.177606	0.102646	0.0680108	0.314359	0.363336	0.352619	-0.176142	0.0781278	-0.109055	-0.0573657	0.273351	0.224302	0.263054	0.423918	0.353735	0.485281
Plasmenyl.PC.39.4	-0.198824	-0.196412	-0.108827	0.00594059	-0.174077	-0.143678	-0.039676	-0.0351635	-0.135626	-0.0706511	0.0112811	-0.147003	-0.0470807	-0.124704	-0.0354755	-0.00428443	-0.0970777	-0.14057	0.0860846	-0.0585659	0.0220822	0.616634	-0.0760876	0.366937	-0.205857	0.151911	0.228371	0.499334	0.27604	0.430039	0.86147	0.461386	0.433243	0.060258	-0.519508	0.070159	-0.0125173	-0.164176	-0.178986	0.246013	-0.302046	0.12066	0.342238	-0.0656346	-0.0747675	-0.287441	-0.242976	-0.283132	-0.223126
Plasmenyl.PC.39.5	-0.360552	-0.227195	-0.288557	-0.176202	-0.200384	-0.288041	-0.263738	-0.256706	-0.0740474	-0.129133	-0.172337	-0.330753	-0.0393279	-0.262274	-0.248557	-0.142634	-0.0887009	-0.170993	-0.0277348	-0.211917	0.00158416	0.62273	-0.183834	0.307879	-0.184302	0.00262826	0.0927573	0.32036	0.207201	0.131893	0.634515	0.335266	0.311971	-0.0864446	-0.3561	-0.130621	-0.235332	-0.0838524	-0.162004	0.133873	-0.328677	0.206577	0.238992	-0.0842964	-0.090081	-0.345983	-0.318872	-0.32372	-0.305635
Plasmenyl.PC.39.6	-0.195356	-0.289865	0.0364356	0.099838	-0.3194	0.0230663	0.0615182	0.153003	-0.336418	0.0281788	0.0309151	0.030255	-0.130477	0.0256946	-0.114935	0.162964	-0.0874407	-0.0838404	0.339862	0.000144014	0.188731	0.156712	0.31628	0.247129	0.295794	0.11796	0.131149	0.193603	0.275368	-0.0187699	0.0665347	0.255026	0.153315	0.0530213	0.0384398	0.0112091	0.0608341	0.240264	0.277636	-0.182898	0.104518	0.00807681	-0.134533	0.122844	-0.0565257	-0.0208461	0.0875128	0.050465	0.112211
Plasmenyl.PC.40.0	-0.0955296	-0.201368	0.200588	0.305371	-0.213153	0.15934	0.207009	0.368173	-0.252601	-0.0318512	0.310531	0.169361	0.248533	0.363012	0.0922652	0.269295	-0.239388	0.040108	0.421398	0.0540534	0.291041	0.295698	0.427135	0.405629	0.288401	0.435572	0.189439	0.33589	0.31724	0.149679	0.129685	0.322208	0.266499	0.144002	0.16126	0.11736	0.253633	0.383582	0.23574	-0.0570057	0.00440444	-0.0287549	0.0139454	0.266283	0.165953	0.0736274	0.253561	0.209841	0.327201
Plasmenyl.PC.40.1	-0.312163	-0.266055	-0.160744	-0.00908491	-0.204176	-0.170189	-0.0666427	-0.0755116	-0.150543	-0.0874767	-0.0521332	-0.190207	0.0966457	-0.0256346	-0.0820522	0.0826283	-0.111803	-0.16282	0.143942	-0.127201	0.0106331	0.594047	-0.00868887	0.409649	-0.116064	0.218314	0.0531893	0.3564	0.16324	0.146919	0.671935	0.352367	0.341722	-0.0182058	-0.341242	-0.0516532	-0.0174617	0.029883	-0.0244104	0.145383	-0.392739	0.0259706	0.370765	-0.0644104	-0.00338434	-0.39634	-0.21751	-0.249877	-0.148347
Plasmenyl.PC.40.2	-0.0364236	-0.106499	0.14375	0.222718	-0.123612	0.150687	0.230639	0.238404	0.00811281	-0.0541734	0.270339	0.116688	0.264566	0.415746	0.131161	0.239976	-0.197216	-0.019694	0.273351	0.175398	0.199724	0.254065	0.250909	0.354203	0.287921	0.255338	0.19652	0.15568	0.0882208	0.131005	0.0805161	0.0837924	0.228527	0.203744	0.122952	0.187819	0.0578818	0.160924	0.129301	0.0728593	-0.0154455	0.0270867	-0.0260426	-0.0535374	0.168245	0.0791959	0.171305	0.215566	0.228767
Plasmenyl.PC.40.3	-0.170321	-0.232175	0.0479448	0.17637	-0.217414	0.030255	0.0505491	0.274611	-0.234827	0.0233423	0.14219	0.0713111	0.157996	0.204752	0.0905491	0.305071	-0.209733	-0.224926	0.347663	0.0115092	0.183642	0.253141	0.330921	0.403192	0.137354	0.413045	0.0351155	0.334893	0.281884	0.156652	0.202928	0.23688	0.178194	0.137282	-0.00250825	0.0594419	0.150975	0.346739	0.372937	-0.0186619	-0.0315512	0.0827963	0.0577858	0.137318	0.155308	0.0456526	0.248617	0.161512	0.252313
Plasmenyl.PC.40.4	0.335422	0.202844	0.417702	0.453993	0.198716	0.487753	0.462154	0.55508	0.0820162	0.278368	0.552475	0.356412	0.112967	0.474503	0.488941	0.370741	-0.170369	-0.0637744	0.24186	0.14219	0.29901	0.197324	0.316208	0.576742	0.18321	0.481176	0.308479	0.559448	0.351659	0.344806	0.241668	0.415554	0.369589	0.331605	0.0510651	0.322964	0.333297	0.139778	0.205641	-0.0731713	0.169253	-0.0288029	0.0114971	0.243324	0.22165	0.282004	0.418722	0.318656	0.414545
Plasmenyl.PC.40.5	0.144854	0.0310591	0.230135	0.145179	0.0236184	0.227807	0.148119	0.310459	-0.0191179	0.0535014	0.175734	0.275848	0.070171	0.325689	0.162688	0.249913	-0.127837	0.181422	0.112847	0.272595	0.205605	-0.247441	0.365845	0.0644584	0.476208	0.278692	0.0876568	0.0156376	0.117252	-0.049769	-0.415878	-0.0165617	-0.241788	0.0952655	0.549295	0.0491209	0.198368	0.308743	0.336742	-0.265263	0.381938	-0.171137	-0.236736	0.286877	0.210765	0.349199	0.430279	0.462262	0.428827
Plasmenyl.PC.40.6	0.0243144	-0.0374317	0.0810201	0.12492	-0.0660546	0.149907	0.122544	0.112091	0.0206181	0.133537	0.172205	0.123972	0.0275068	0.271371	0.0806721	0.162892	-0.190531	0.0528773	0.111071	0.0153855	0.12054	0.168341	0.173129	0.361044	0.170525	0.23934	0.29997	0.374749	0.350003	0.225923	0.108587	0.452517	0.142274	0.207009	0.147723	0.127801	0.182562	0.0793159	0.0749595	0.150291	0.235128	-0.0365797	-0.214485	0.156088	0.129733	0.189583	0.215242	0.321992	0.193663
Plasmenyl.PC.41.3	-0.0727273	-0.0542334	-0.0582658	-0.11862	-0.133717	-0.0285749	0.0744914	-0.0883408	0.0879688	0.0445004	-0.0883048	-0.0137414	-0.164716	0.0345635	-0.0586259	0.169601	-0.070195	-0.172049	0.0215062	0.0430723	-0.00691269	-0.0457966	-0.114311	-0.0354155	0.0208941	-0.134557	0.194467	-0.03988	-0.0930093	0.12318	0.0636184	-0.0156736	0.0535614	0.1582	0.0322952	0.0459886	-0.130933	-0.029847	-0.0875488	0.0734713	0.130837	0.0736754	-0.170417	-0.238284	-0.101338	0.0789079	-0.0110651	0.059994	-0.0444524
Plasmenyl.PC.41.5	0.115668	0.0465767	0.0824602	0.0464446	0.0129133	0.120276	0.0769277	0.250525	-0.0316352	0.130681	0.162904	0.133081	0.000444044	0.30171	0.0892169	0.0217822	-0.180774	0.128761	0.0356796	0.344074	0.342934	-0.326985	0.376718	-0.0108011	0.473711	0.179442	0.11538	-0.0248305	0.219742	-0.0782838	-0.405593	0.0683228	-0.210621	0.116184	0.383042	-0.0351515	0.137546	0.231947	0.219466	-0.0451725	0.370861	-0.174701	-0.434167	0.237708	0.33727	0.388455	0.470231	0.460198	0.425791
Plasmenyl.PC.41.6	0.0422922	-0.0315392	0.207681	0.22375	0.0242064	0.253201	0.268227	0.25781	-0.0887009	0.0756316	0.286841	0.141266	-0.069595	0.316196	0.166253	0.309463	-0.233159	0.10099	0.190915	0.107663	0.23514	0.0263786	0.297594	0.355584	0.299394	0.283528	0.0669067	0.254785	0.217894	0.142934	0.0469847	0.254209	0.0823642	0.253645	0.197984	0.24354	0.344086	0.284752	0.287897	-0.177714	0.183534	-0.266103	-0.236328	0.26249	0.104998	0.157384	0.308071	0.247225	0.383198
Plasmenyl.PC.42.0	0.0113771	-0.0263306	0.128785	0.108983	-0.0541974	0.0832283	0.145383	0.265635	-0.0893369	-0.0560576	0.1633	0.34453	0.181002	0.310087	0.105467	0.243828	-0.138986	0.142286	0.242784	0.212037	0.246685	0.106775	0.319052	0.145539	0.193099	0.380354	0.125569	0.156436	0.364644	0.00424843	-0.0951695	0.173957	0.0268347	0.154743	0.201464	0.0391119	0.263798	0.250549	0.205869	-0.212349	0.0777918	-0.109739	-0.131605	0.224914	0.163084	0.165329	0.25943	0.305575	0.305611
Plasmenyl.PC.42.1	0.0630303	-0.049517	0.250981	0.278728	-0.0463126	0.242412	0.287801	0.490957	-0.161668	0.00675668	0.359916	0.255086	0.201188	0.530981	0.206097	0.376646	-0.267555	0.122496	0.323264	0.259538	0.362568	0.1973	0.443984	0.432643	0.378422	0.517732	0.28474	0.347123	0.392547	0.117948	0.00729673	0.358788	0.177366	0.265551	0.272667	0.151275	0.387735	0.400624	0.377438	-0.157432	0.0959016	-0.267987	-0.14069	0.261842	0.209745	0.213573	0.419394	0.386811	0.481044
Plasmenyl.PC.42.2	-0.0163696	-0.0829763	0.121836	0.194887	-0.0642184	0.149475	0.233267	0.328785	-0.104002	-0.0440804	0.309259	0.188767	0.18267	0.387579	0.193027	0.342082	-0.277924	0.0142214	0.249925	0.090357	0.232703	0.25769	0.376166	0.507183	0.293465	0.453897	0.154575	0.213993	0.186595	-0.00690069	0.0518572	0.208281	0.272451	0.105023	0.157876	0.0761476	0.223786	0.348635	0.275056	-0.142466	-0.00380438	-0.0786919	-0.0193939	0.0919772	0.214005	0.101398	0.243732	0.141686	0.262442
Plasmenyl.PC.42.3	0.109703	-0.0483768	0.271875	0.295326	-0.0532733	0.295662	0.32192	0.526277	-0.0646145	0.10093	0.377654	0.316592	0.146811	0.499394	0.247501	0.331353	-0.0812841	0.0140774	0.289985	0.10459	0.208545	0.166253	0.412037	0.466103	0.26273	0.435848	0.312283	0.394623	0.286625	0.21583	0.0671587	0.372901	0.255542	0.297282	0.221146	0.215434	0.30297	0.35862	0.320816	-0.0040204	0.276928	-0.0142574	-0.0934413	0.099838	0.257426	0.389859	0.469139	0.413753	0.433339
Plasmenyl.PC.42.4	0.0511371	-0.0489769	0.177558	0.266463	-0.0468647	0.229703	0.270987	0.470687	-0.049709	0.0955776	0.36486	0.281836	0.242364	0.424722	0.265623	0.327297	-0.164428	-0.0235944	0.303942	0.0712751	0.252949	0.282724	0.369625	0.518956	0.273315	0.399964	0.223066	0.432223	0.288281	0.254485	0.200636	0.344638	0.356076	0.229127	0.0951095	0.154431	0.216214	0.278068	0.217774	0.0591899	0.169769	-0.0370837	0.00661266	0.0622622	0.255434	0.203504	0.312367	0.216202	0.311455
Plasmenyl.PC.42.5	0.108431	0.0248665	0.227315	0.333693	0.0494569	0.274155	0.336262	0.456706	-0.0528053	0.186967	0.395212	0.259286	0.153819	0.351203	0.372109	0.299166	-0.212469	-0.0266307	0.28186	0.0177498	0.180162	0.246889	0.31808	0.524116	0.269559	0.4373	0.133885	0.413849	0.276256	0.136106	0.2021	0.346667	0.344806	0.1158	0.0517492	0.122832	0.285581	0.220702	0.204188	-0.0419922	0.114431	-0.020222	0.0714431	0.219766	0.225407	0.122172	0.367369	0.201716	0.363732
Plasmenyl.PC.42.6	0.0818362	0.0909931	0.104218	0.141542	0.0771917	0.154395	0.174329	0.249829	0.118224	0.163096	0.282736	0.192919	0.16402	0.30405	0.292469	0.290501	-0.0824842	-0.0659346	0.0935854	-0.0223942	0.0209301	0.185671	0.0935134	0.361704	0.0993219	0.224602	0.168533	0.301566	0.223498	0.101254	0.159712	0.34021	0.178014	0.159448	0.0651185	0.0589859	0.175506	0.019838	0.154863	0.0486529	0.0378758	-0.020006	-0.0509691	0.119088	0.0757756	0.109595	0.235884	0.219082	0.238896
Plasmenyl.PC.44.3	-0.126193	-0.261326	0.132049	0.173621	-0.261734	0.126529	0.186919	0.404632	-0.2024	-0.09985	0.32042	0.11658	0.137486	0.446637	0.0938614	0.359412	-0.270879	0.0729193	0.270603	0.205641	0.305851	0.220462	0.411485	0.414653	0.278536	0.430039	0.243972	0.280792	0.242976	0.150963	0.0736034	0.263102	0.151143	0.143234	0.20318	0.0552895	0.222466	0.429931	0.346091	-0.039844	-0.0254425	-0.102634	-0.09967	0.0192019	0.207597	0.169841	0.388443	0.328413	0.403864
Plasmenyl.PC.44.4	0.141842	0.0569217	0.17619	0.229739	0.0310111	0.273327	0.294113	0.455638	0.0605221	0.118956	0.432595	0.262286	0.129673	0.47832	0.316088	0.335362	-0.149331	0.010441	0.189751	0.119232	0.228335	0.214737	0.33523	0.496754	0.224014	0.416574	0.307795	0.449049	0.293945	0.253993	0.178686	0.421542	0.248629	0.270999	0.125905	0.16084	0.286505	0.234095	0.19892	0.039604	0.239832	-0.104758	-0.0518212	0.176082	0.265503	0.291641	0.373753	0.310891	0.369337
Plasmenyl.PC.44.5	0.163516	0.0511251	0.24084	0.325785	0.0528653	0.273555	0.38057	0.51634	-0.0192379	0.145563	0.469751	0.381134	0.207297	0.430291	0.365737	0.397156	-0.211185	0.0782478	0.271479	0.150147	0.322772	0.207189	0.365209	0.569049	0.163516	0.534173	0.331605	0.495578	0.422622	0.189847	0.173621	0.443216	0.276112	0.119472	0.0622862	0.0784998	0.281236	0.252145	0.228239	-0.00220822	0.129385	-0.180654	-0.0320912	0.231419	0.167849	0.253849	0.311275	0.215278	0.319124
Plasmenyl.PC.44.6	-0.164296	-0.337174	0.207225	0.309715	-0.301494	0.220486	0.317528	0.466451	-0.350879	0.0814641	0.364632	0.243108	0.0581458	0.271803	0.137522	0.384962	-0.27982	-0.113135	0.443948	0.0807921	0.253621	0.2406	0.567165	0.592991	0.307807	0.470819	0.26231	0.420114	0.360468	0.102742	0.154455	0.427171	0.278368	0.0939934	0.165905	0.0108731	0.228251	0.482448	0.274239	-0.137054	0.160264	-0.00967297	-0.0966337	0.104206	0.108755	0.177666	0.336562	0.196784	0.341338
Plasmenyl.PC.46.4	0.0670267	0.0111011	0.105515	0.14165	-0.0121452	0.149655	0.224386	0.300738	0.0648545	-0.0131053	0.29781	0.121884	0.0652385	0.371545	0.177906	0.311719	-0.223282	0.0209661	0.139946	0.212193	0.165977	0.272103	0.2391	0.421434	0.1206	0.368593	0.390951	0.435236	0.277216	0.33793	0.312163	0.380222	0.285809	0.262682	-0.0353915	0.186655	0.18051	0.114407	0.169673	0.0935734	-0.0413321	-0.0288989	0.0144254	-0.0249625	0.145095	0.0605581	0.159616	0.202388	0.2015
Plasmenyl.PE.32.0	0.020186	0.101422	-0.101122	-0.0511251	0.00254425	-0.0440924	0.00308431	0.0797	0.148119	-0.101338	0.0540174	-0.0431563	-0.113747	0.213585	0.0652025	0.147747	0.050189	0.0954935	-0.0248065	0.0631263	0.0580018	0.0579418	-0.0233303	0.11592	0.200276	0.175266	0.252757	0.16312	0.120456	0.227411	-0.0933213	0.18147	-0.0424722	0.133669	0.0970057	0.106271	0.0721152	0.00621662	0.0545815	0.144266	0.207369	0.0529373	-0.161584	0.161296	0.300834	0.199592	0.212853	0.345131	0.199076
Plasmenyl.PE.32.1	0.176562	0.171437	0.110399	0.0973657	0.152919	0.137066	0.168197	0.176946	-0.00631263	-0.0556976	0.299106	0.166229	0.179754	0.197156	0.163684	0.391023	-0.236448	0.191551	-0.0381038	0.227183	0.230423	0.00933693	0.169781	0.170009	0.174749	0.333741	0.184278	0.133945	0.2397	0.0916052	-0.0853405	0.149763	-0.121764	0.0554455	0.24054	0.0747075	0.138998	0.0860246	0.105779	-0.187051	0.187507	-0.211557	0.0914131	0.17697	0.17871	0.201764	0.159592	0.223666	0.230159
Plasmenyl.PE.32.2	0.000744074	-0.0325713	0.0584818	0.0791119	-0.0660186	0.0941374	0.0844524	0.134389	-0.116064	-0.0933573	0.149043	0.00536454	0.204404	0.243948	0.0469967	0.428095	-0.0855806	0.210621	0.0889769	0.0379478	0.121416	0.020114	0.193435	0.213813	0.271743	0.242448	0.0253345	-0.00626463	0.108203	-0.112055	-0.214569	0.0112931	-0.0839724	-0.0059886	0.244308	0.00435644	0.123864	0.287285	0.37985	-0.26069	0.125665	-0.137534	0.0385599	0.206865	0.196604	0.193987	0.267603	0.270183	0.312163
Plasmenyl.PE.33.1	-0.17559	-0.180306	-0.0665827	-0.0712391	-0.199556	-0.0636544	-0.0475848	0.154851	-0.290489	-0.0857126	0.129841	-0.0260066	0.158272	0.0869127	-0.0935854	0.219418	-0.0794359	0.0962856	0.183354	0.157768	0.347159	0.156484	0.270255	0.213801	0.31988	0.262946	0.099838	0.133333	0.272115	0.0183858	-0.0225143	0.102682	0.0815482	-0.132757	0.115296	-0.13841	-0.124092	0.311179	0.288089	-0.141134	0.0831443	-0.0529973	-0.0263306	0.0407801	0.250249	0.0590339	0.132589	0.0745515	0.143726
Plasmenyl.PE.33.2	-0.0564536	-0.0378758	-0.080288	-0.0224542	-0.0570177	-0.0473087	-0.0492649	0.0183738	-0.113231	-0.00171617	0.029967	-0.104182	0.14003	-0.0163216	-0.00908491	0.188299	-0.0946535	0.254653	0.0550735	-0.0590339	0.255962	0.208269	0.0039484	0.164908	0.0963456	0.0612781	0.0163096	-0.0178578	0.0607021	-0.176886	-0.0562496	0.0254665	0.00962496	-0.0957096	0.121584	-0.18021	-0.0638104	0.13685	0.203756	-0.0640864	-0.0531653	-0.119172	-0.06027	0.175218	0.163708	0.0831323	0.11814	0.158656	0.188875
Plasmenyl.PE.34.0	0.0727993	-0.0533453	0.239736	0.203084	-0.0533573	0.253369	0.316448	0.536082	-0.176058	-0.0411041	0.356592	0.308119	-0.0575218	0.270663	0.199556	0.359136	-0.234455	0.167321	0.223234	0.171881	0.341662	-0.0339154	0.458638	0.339634	0.370921	0.41967	0.363432	0.368005	0.333285	0.187819	-0.0738674	0.354719	0.0826763	0.222862	0.345203	0.155116	0.33661	0.338122	0.352871	-0.289805	0.346991	-0.13529	-0.254869	0.398488	0.218782	0.433711	0.429331	0.420054	0.513759
Plasmenyl.PE.34.1	-0.127933	-0.160912	0.0659106	0.090177	-0.148695	0.0553735	0.0933333	0.243732	-0.250489	-0.17697	0.143186	0.0369277	-0.0155656	0.167429	0.020306	0.3155	-0.254257	0.178554	0.245797	-0.107831	0.0846685	0.259106	0.328137	0.476784	0.128569	0.379418	0.211749	0.385527	0.2406	0.11538	0.039892	0.343906	0.0860726	0.232271	0.185995	0.173333	0.306955	0.343894	0.278536	-0.326205	0.229739	-0.00384038	-0.125377	0.257474	0.206865	0.207921	0.31544	0.290669	0.388419
Plasmenyl.PE.34.2	-0.0983258	-0.0908131	-0.0809721	0.00753675	-0.0948335	-0.069607	-0.0428443	0.0165857	-0.187207	-0.0953975	0.154479	-0.1585	0.039568	0.105779	-0.0147975	0.237972	-0.224194	0.159664	0.137054	-0.130177	0.127765	0.324824	0.151755	0.488773	0.0358236	0.294533	0.108059	0.242664	0.173609	0.0548455	0.0546535	0.27586	0.136742	0.0741914	0.0841164	0.0424482	0.141374	0.174149	0.266331	-0.151515	0.0364596	0.0356916	-0.00312031	0.100414	0.182526	0.106739	0.190867	0.175842	0.228911
Plasmenyl.PE.34.3	-0.0657066	-0.0624902	-0.0854605	-0.049997	-0.106859	-0.0894089	-0.0354875	0.104794	-0.144806	-0.16438	0.173225	-0.136226	0.0852325	0.193375	-0.0546535	0.267663	-0.170237	0.110195	0.0546535	0.0918092	0.246745	0.227927	0.134341	0.350075	0.147567	0.319376	0.19514	0.183186	0.303534	0.157228	-0.00321632	0.22135	0.109379	-0.0660906	0.0441164	-0.0353195	0.0518092	0.131317	0.298482	-0.0887009	0.0050525	-0.0135974	-0.0123732	0.163984	0.236496	0.12108	0.198572	0.251917	0.242784
Plasmenyl.PE.34.4	-0.266307	-0.233879	-0.225875	-0.15976	-0.22075	-0.224446	-0.216466	-0.10423	-0.182286	-0.0824842	-0.116808	-0.237252	0.0827123	-0.0413201	-0.240024	0.154431	-0.0252025	0.0832163	0.0039484	-0.101098	-0.0393879	0.511287	-0.0233543	0.344758	-0.0211341	0.153159	0.0986979	0.304122	0.346619	0.0223462	0.400336	0.360204	0.202904	-0.0582898	-0.211065	-0.181242	-0.110039	0.12198	0.176778	-0.0230423	-0.0540894	-0.010021	0.0781158	0.0825923	-0.0253585	-0.130981	0.0275308	0.0731473	0.0517852
Plasmenyl.PE.35.1	0.220102	0.141818	0.119628	0.109799	0.119304	0.129889	0.0969337	0.148899	-0.0884008	-0.049517	0.145383	0.0135854	0.0271107	0.168317	0.0687189	0.273219	-0.150435	0.169949	0.0570057	0.0913531	0.282496	0.224074	0.190939	0.310567	0.164956	0.22069	0.134689	0.122808	0.14453	-0.0643144	-0.0820522	0.180834	-0.0549535	0.100486	0.108803	0.0268107	0.0587939	0.173489	0.215482	-0.250417	0.234323	-0.0247945	-0.0684308	0.234299	0.217486	0.230471	0.2833	0.321452	0.306031
Plasmenyl.PE.35.2	-0.399532	-0.281236	-0.309127	-0.190879	-0.281368	-0.302046	-0.247837	-0.212313	-0.213573	-0.132325	-0.176934	-0.353387	0.0887489	-0.191263	-0.229967	-0.0121572	-0.0782598	-0.0253705	0.10387	-0.291497	0.0565257	0.585443	-0.049913	0.298386	-0.0788479	0.059958	-0.0163816	0.210261	0.189631	0.079508	0.434863	0.291809	0.166469	-0.0994179	-0.245833	-0.131137	-0.0632943	0.0831083	0.115776	0.0771797	-0.265095	0.0864206	0.190627	0.0330513	-0.0417042	-0.332925	-0.214293	-0.180558	-0.131725
Plasmenyl.PE.35.4	-0.0345875	-0.100174	0.0249385	0.0155776	-0.160216	0.0321512	0.0622142	0.138734	-0.220786	-0.165977	0.0990939	-0.010225	-0.070375	0.0842364	-0.0789199	0.167429	-0.0981458	0.166997	0.03988	0.115404	0.193483	-0.00206421	0.1209	0.0764956	0.244212	0.0791959	0.190639	-0.00588059	0.173333	-0.00678068	-0.108479	0.0447405	0.0206661	0.0250705	0.0652145	-0.0246625	-0.0346235	0.0714551	0.30423	-0.149787	0.134977	0.00560456	-0.195536	0.182478	-0.0137054	0.190039	0.19766	0.287789	0.193111
Plasmenyl.PE.36.1	0.00186019	-0.0253945	0.0535014	0.0509091	-0.0333873	0.0732673	0.0877528	0.259394	-0.205845	-0.00685268	0.173141	0.0431203	0.000120012	0.221326	0.0390159	0.314707	-0.185395	0.0944974	0.157348	-0.0782958	0.139118	0.245257	0.336034	0.435056	0.156496	0.36222	0.148119	0.296778	0.250441	0.0884008	-0.00787279	0.309199	0.136742	0.208305	0.164236	0.128521	0.27802	0.343054	0.424638	-0.364416	0.237408	-0.0567297	-0.121644	0.334761	0.155548	0.215578	0.365413	0.306091	0.409817
Plasmenyl.PE.36.2	0.00319232	0.039592	-0.04018	0.0180738	0.0244224	-0.0131773	0.0225143	0.116916	-0.190459	-0.0656226	0.182682	-0.0286469	0.0729913	0.156148	0.0745875	0.36048	-0.228179	0.140582	0.10489	-0.0812121	0.215182	0.310195	0.188599	0.496346	0.125353	0.406433	0.0987219	0.279208	0.259802	0.059682	0.0205101	0.334809	0.0918692	0.123396	0.138134	0.0646145	0.199724	0.262166	0.327189	-0.318944	0.0990819	-0.0253705	0.0271827	0.282688	0.197444	0.118836	0.256754	0.245461	0.315728
Plasmenyl.PE.36.3	-0.132073	-0.0981578	-0.143402	-0.0973897	-0.152043	-0.112343	-0.0361836	0.0741674	-0.133357	-0.121872	0.13703	-0.131713	0.00216022	0.260366	-0.0232463	0.24402	-0.15634	0.217894	0.126901	0.110663	0.185047	0.267447	0.173321	0.403072	0.106055	0.354155	0.343738	0.364524	0.327045	0.325233	0.100966	0.369673	0.109151	0.196856	0.0751395	0.112427	0.145491	0.185911	0.184194	0.0371677	0.029799	0.00906091	-0.153243	0.0836724	0.277276	0.079568	0.218014	0.271155	0.253033
Plasmenyl.PE.36.4	0.121824	0.0457126	0.151299	0.151851	0.00582058	0.184254	0.158488	0.355596	-0.140114	0.0228383	0.225851	0.164056	-0.019802	0.22087	0.170657	0.337102	-0.204368	0.262562	0.156376	-0.0336034	0.0648305	0.143234	0.239652	0.386907	0.134725	0.304566	0.287045	0.417774	0.354815	0.190795	0.00480048	0.426763	0.18225	0.302454	0.288677	0.208425	0.383522	0.184146	0.226739	-0.205005	0.349487	-0.0329913	-0.176922	0.263606	0.185095	0.399532	0.452913	0.397768	0.452049
Plasmenyl.PE.36.5	-0.234659	-0.112499	-0.234563	-0.201956	-0.090477	-0.222502	-0.214293	-0.212877	0.00422442	-0.0860246	-0.149559	-0.147711	0.020222	-0.0887249	-0.158932	0.0663066	-0.0477528	0.10483	-0.0985419	-0.117012	-0.090213	0.45715	-0.131317	0.297678	-0.201956	0.0811521	0.133897	0.384818	0.433315	0.134749	0.490381	0.42483	0.237516	-0.103966	-0.314575	-0.119016	-0.124488	-0.0736034	-0.0486889	0.108215	-0.158128	0.0650345	0.102166	0.0573297	-0.0434083	-0.245293	-0.126325	-0.0734713	-0.124488
Plasmenyl.PE.36.6	0.100126	0.106931	0.00820882	0.0486049	0.0318152	0.0553975	0.040084	0.124344	-0.0217102	-0.0634143	0.000636064	0.0122412	-0.0973537	0.090237	-0.0312511	0.130813	-0.0425203	0.311815	-0.029571	0.0349235	-0.00370837	0.126397	0.079628	0.274431	0.12018	0.234119	0.245989	0.276916	0.364356	-0.0438284	-0.019922	0.400732	0.0759076	0.139634	0.152547	0.0758836	0.154191	0.090033	0.169421	-0.165029	0.156832	-0.153099	-0.0656106	0.331989	0.0649625	0.20402	0.170561	0.348083	0.24282
Plasmenyl.PE.37.0	0.108623	0.251965	-0.196772	-0.245065	0.211353	-0.159028	-0.277408	-0.262442	0.266787	-0.134605	-0.169037	-0.201572	0.00471647	-0.123324	-0.191299	-0.0430123	0.050405	-0.00752475	-0.277468	0.139298	0.0136094	-0.115464	-0.180426	-0.236544	-0.0710831	-0.178698	-0.0417522	-0.158332	0.0215302	-0.154311	-0.173201	-0.0934413	-0.214125	-0.169469	-0.0318272	-0.117348	-0.258638	-0.166601	-0.0782118	-0.0726193	0.136502	-0.134689	0.0827723	-0.14159	0.101086	0.11718	-0.079748	0.0531053	-0.0987699
Plasmenyl.PE.37.2	0.0906931	0.0605461	0.106787	0.165965	0.0253345	0.146751	0.149883	0.205905	0.00156016	-0.101542	0.318236	0.149607	0.138746	0.337726	0.101566	0.262562	-0.249373	0.178794	0.120444	0.203492	0.265563	-0.0194659	0.210801	0.206913	0.252121	0.313723	0.175062	0.0216622	0.134377	-0.0465527	-0.306163	0.030267	0.0476568	0.129181	0.348287	0.0962616	0.162712	0.275392	0.270183	-0.0881728	0.136226	-0.119484	-0.114707	0.215194	0.373669	0.358272	0.365821	0.381242	0.413885
Plasmenyl.PE.37.3	0.0889169	0.0658626	0.0612301	0.0467207	0.0265707	0.127081	0.121548	0.132913	-0.0446205	0.00934893	0.163288	0.103954	-0.0728953	0.227771	0.205497	0.19676	-0.110339	0.242508	0.060366	0.136742	0.292049	0.182598	0.172517	0.215566	0.23706	0.197864	0.277168	0.171533	0.199844	0.144374	-0.00788479	0.204476	0.060234	0.105803	0.209997	0.152619	0.0853765	0.111479	0.237048	-0.164884	0.198116	0.0582418	-0.18213	0.26333	0.241632	0.229835	0.224506	0.234239	0.259622
Plasmenyl.PE.37.4	-0.0105251	-0.0954815	0.119412	0.131581	-0.126217	0.159508	0.211869	0.399892	-0.332313	-0.049625	0.27958	0.13841	0.0190819	0.240492	0.0673987	0.357876	-0.302382	0.148635	0.279232	0.0455086	0.269031	0.262946	0.409637	0.48246	0.301158	0.349499	0.304926	0.369337	0.431827	0.105683	0.030075	0.41661	0.225179	0.14183	0.16228	0.136214	0.277948	0.376538	0.411233	-0.207549	0.19802	0.0206181	-0.177138	0.295134	0.115716	0.23958	0.359832	0.28288	0.39652
Plasmenyl.PE.37.6	0.223954	0.10381	0.245497	0.179778	0.090093	0.267783	0.201404	0.235584	-0.0462166	0.0927093	0.151707	0.17685	-0.163504	0.23724	0.1624	0.133669	-0.131557	0.22393	-0.0215182	0.22093	0.227051	0.0131173	0.223378	0.307435	0.159988	0.274587	0.351167	0.227615	0.352187	0.020018	-0.134221	0.293645	0.0683108	0.107567	0.282016	0.149727	0.13583	0.13769	0.181866	-0.185467	0.141698	-0.0929013	-0.174377	0.351719	0.255638	0.391971	0.431611	0.480612	0.412181
Plasmenyl.PE.38.1	-0.339706	-0.3194	-0.156748	-0.100966	-0.34393	-0.153555	-0.0866247	0.0808161	-0.111251	-0.128929	-0.0118332	-0.142382	0.0745155	0.179466	-0.135494	0.107999	0.0216502	0.140078	0.0785479	-0.00188419	-0.00967297	0.205101	0.167909	0.153603	0.160456	0.171401	0.100378	0.040024	0.030363	0.0669547	-0.0544254	0.0494449	0.0893609	0.0992859	0.132277	0.0334473	0.0557336	0.24138	0.195824	0.0572817	0.0588659	-0.00631263	-0.253957	0.13907	0.227507	0.143186	0.229727	0.306847	0.321812
Plasmenyl.PE.38.2	-0.0343714	-0.107195	0.127993	0.223786	-0.160936	0.136922	0.234203	0.345539	-0.252697	-0.10165	0.215614	0.15658	0.282724	0.30093	0.189619	0.578026	-0.214965	-0.0238464	0.316604	-0.00639664	0.20156	0.200744	0.341842	0.41961	0.212373	0.481908	0.1609	0.26459	0.195224	0.0958896	0.0216022	0.228623	0.292973	0.131677	0.141998	0.125917	0.266727	0.364176	0.34105	-0.165737	0.163348	0.0121692	0.0636664	0.240024	0.299814	0.207861	0.332925	0.23532	0.394059
Plasmenyl.PE.38.3	0.185971	0.226367	-0.00410441	-0.0406001	0.167429	0.0646265	0.0415482	0.0740354	0.0774917	-0.00264026	0.139346	0.0419922	-0.0126613	0.126829	0.193831	0.162268	-0.0769517	0.211401	-0.0650225	0.0845965	0.127477	0.186811	0.00141614	0.244596	0.0153255	0.133945	0.272811	0.244008	0.192103	0.221518	0.0830963	0.254617	0.0530093	0.175338	0.115488	0.177714	0.0746955	-0.0330513	0.0560696	-0.130693	0.107231	0.0130933	-0.0423762	0.221722	0.165293	0.17613	0.175086	0.184458	0.187579
Plasmenyl.PE.38.4	-0.00162016	-0.0762436	0.119592	0.124212	-0.107363	0.154851	0.186295	0.387351	-0.267759	0.00963696	0.264938	0.161332	0.000780078	0.188287	0.163912	0.354551	-0.247057	0.171281	0.234119	-0.0481968	0.11772	0.230531	0.300462	0.416034	0.269091	0.305491	0.211281	0.367813	0.316616	0.179586	0.0424842	0.37733	0.221926	0.252589	0.268335	0.192751	0.320324	0.278584	0.300738	-0.299106	0.285004	0.111515	-0.172661	0.278692	0.089781	0.301854	0.408389	0.318812	0.432043
Plasmenyl.PE.38.5	0.112103	-0.0154575	0.245317	0.246541	-0.0193579	0.277564	0.315932	0.570873	-0.278692	0.0917732	0.426571	0.273987	0.0141254	0.371101	0.175434	0.39712	-0.243972	0.147987	0.283084	0.167249	0.269799	0.0936814	0.517936	0.534173	0.307363	0.536178	0.34021	0.51844	0.501878	0.223546	0.0280468	0.520912	0.241512	0.269787	0.220186	0.209253	0.395272	0.386163	0.373897	-0.22393	0.307255	-0.0911011	-0.251917	0.34249	0.174593	0.348791	0.501446	0.426523	0.532385
Plasmenyl.PE.38.6	-0.115524	-0.321752	0.268311	0.298734	-0.294437	0.26405	0.255698	0.469211	-0.437144	0.0160936	0.267243	0.187291	-0.0394719	0.270663	0.0430123	0.328089	-0.172529	0.105251	0.403096	-0.0117852	0.152355	0.0558416	0.555368	0.578146	0.337834	0.401836	0.318008	0.451953	0.39862	0.0593819	0.0117132	0.493369	0.236544	0.157996	0.231947	0.129349	0.29997	0.487105	0.35556	-0.197972	0.347711	-0.0574617	-0.307855	0.239232	0.210057	0.387363	0.549883	0.431479	0.535002
Plasmenyl.PE.39.4	0.200372	0.172025	0.0864206	0.0911491	0.141722	0.122604	0.105947	0.173405	0.0060126	0.0105731	0.186283	0.148695	0.144266	0.182814	0.227411	0.27766	-0.106667	0.142934	0.0559616	0.0274347	0.117864	0.248341	0.0354275	0.234287	0.0621182	0.11826	0.114419	0.256982	0.254677	0.205569	0.130765	0.245353	-0.0263306	0.179694	0.0456286	0.153795	0.206589	-0.0476688	0.189475	-0.0925773	0.171377	0.0227783	0.0381758	0.233111	0.0647825	0.146907	0.202148	0.227423	0.203732
Plasmenyl.PE.39.6	-0.0685629	-0.14177	0.112259	0.130177	-0.162604	0.139886	0.161224	0.336598	-0.329049	-0.0717552	0.243972	0.0872367	-0.0538134	0.228311	-0.0392799	0.287885	-0.279148	0.154311	0.256274	0.0757276	0.348803	0.244548	0.405389	0.565737	0.389907	0.399616	0.304602	0.46447	0.521728	0.0591779	0.0772997	0.534737	0.22249	0.154431	0.200552	0.0829883	0.181794	0.418794	0.372949	-0.160684	0.23508	0.0136214	-0.181446	0.363588	0.160228	0.182646	0.310411	0.365497	0.378686
Plasmenyl.PE.40.1	-0.129721	-0.147531	-0.0106331	0.0278068	-0.168845	-0.0572577	-0.02003	0.181314	-0.10075	-0.0714791	-0.0588419	-0.00420042	0.0161416	0.135146	0.0323072	0.181338	-0.090045	0.009985	0.122976	0.0378158	0.190207	0.35784	0.165209	0.340126	0.0407321	0.308251	0.221506	0.347699	0.240996	0.197396	0.270279	0.307975	0.109691	0.160576	-0.0329913	0.0929013	0.190483	0.212061	0.163084	-0.00222022	-0.0723912	-0.0828923	0.0204981	0.254653	0.19778	0.0490849	0.163564	0.17859	0.228035
Plasmenyl.PE.40.2	0.162688	0.0759316	0.239712	0.261134	0.0745275	0.234023	0.192115	0.194431	0.00481248	0.16192	0.227795	0.112211	0.0891569	0.36354	0.311551	0.361332	-0.0620342	0.030351	0.212997	-0.019946	0.215374	0.223894	0.244596	0.300906	0.0656346	0.288077	0.102382	0.128089	0.0508611	0.0913891	-0.050297	0.117444	0.106487	0.249205	0.123036	0.215458	0.273015	0.250549	0.222178	-0.240252	0.123072	-0.0613741	-0.0527453	0.172745	0.34123	0.264386	0.444152	0.282436	0.449949
Plasmenyl.PE.40.3	-0.0348275	-0.126301	0.206481	0.226403	-0.115044	0.173945	0.258878	0.333645	-0.185779	-0.0578338	0.331593	0.168281	0.119424	0.292421	0.241344	0.41631	-0.193099	0.144722	0.219382	0.0186859	0.153135	0.23952	0.206589	0.333717	0.165341	0.307219	0.146727	0.236316	0.149703	0.122544	0.128389	0.158236	0.178206	0.308551	0.181014	0.215662	0.284224	0.232871	0.133573	-0.209097	0.089541	0.0358596	-0.0443564	0.285293	0.208569	0.295962	0.396568	0.303402	0.46279
Plasmenyl.PE.40.4	-0.110231	-0.232811	0.125485	0.15814	-0.246301	0.115224	0.169745	0.342526	-0.189259	-0.0279148	0.310507	0.114755	0.155548	0.387627	0.201392	0.416538	-0.119496	0.0891449	0.261422	0.0834443	0.172217	0.233231	0.251653	0.306463	0.147735	0.361692	0.254401	0.311899	0.176502	0.324644	0.175686	0.252877	0.262658	0.349799	0.199736	0.238164	0.287789	0.197156	0.144086	-0.0707951	0.0667027	-0.00523252	-0.0317072	0.177798	0.221758	0.286997	0.407993	0.302682	0.457714
Plasmenyl.PE.40.5	0.0546415	-0.0460246	0.192319	0.213333	-0.0482448	0.209541	0.256838	0.441608	-0.213609	-0.0166817	0.340318	0.205209	0.00156016	0.273183	0.270675	0.456958	-0.288233	0.18063	0.247969	0.0611581	0.198524	0.298014	0.354227	0.536358	0.245125	0.516208	0.322904	0.475392	0.384902	0.309463	0.163792	0.459946	0.302922	0.312595	0.26357	0.236808	0.367237	0.255098	0.250621	-0.290201	0.207777	0.0592739	-0.102526	0.34417	0.25637	0.344098	0.434611	0.353027	0.480228
Plasmenyl.PE.40.6	-0.12222	-0.197636	0.0968377	0.089541	-0.210825	0.089649	0.118416	0.270759	-0.284812	-0.0318032	0.116892	0.0759796	-0.143474	0.130201	0.0281788	0.303126	-0.255518	0.107279	0.209097	-0.0920012	0.15538	0.282088	0.343834	0.513531	0.23838	0.385923	0.28438	0.467075	0.394359	0.140834	0.111095	0.517084	0.208713	0.23622	0.245797	0.0671107	0.242856	0.369985	0.287213	-0.287993	0.256286	0.0887489	-0.215506	0.275908	0.109811	0.180642	0.294785	0.299766	0.333369
Plasmenyl.PE.41.6	0.114875	0.153615	0.0222262	-0.00783678	0.0824842	0.0829523	0.0760036	0.117456	-0.050489	-0.0252745	0.130045	0.099802	0.0420282	0.126697	0.120648	0.173045	-0.192235	0.13649	0.0907891	0.0423522	0.220582	0.113411	0.140702	0.233459	0.225131	0.144926	0.17853	0.231623	0.315848	0.0306871	-0.0292829	0.254401	0.079628	0.0815722	0.158416	0.119076	0.10447	0.139994	0.133405	-0.173201	0.335698	0.0221062	-0.0320792	0.278464	0.190975	0.238488	0.173141	0.182538	0.181662
Plasmenyl.PE.42.4	-0.147687	-0.155392	0.0327393	0.0473447	-0.150483	0.0157456	0.0441764	0.246085	-0.192427	-0.0764476	0.114371	0.0753795	0.101026	0.234875	0.138746	0.232643	-0.254677	0.168353	0.242856	-0.00792079	0.0685029	0.279064	0.199484	0.276076	0.143594	0.302142	0.182706	0.28288	0.299082	0.192079	0.0644464	0.214137	0.125065	0.160948	0.219046	0.116844	0.273891	0.215554	0.190615	-0.102598	0.00607261	-0.0472367	-0.0605461	0.266859	0.178878	0.22417	0.391851	0.25631	0.388815
Plasmenyl.PE.42.5	-0.241644	-0.163744	-0.187243	-0.0869487	-0.157444	-0.216766	-0.130249	-0.220546	-0.0206421	-0.0631023	-0.126745	-0.185071	0.0380198	-0.0720672	-0.049949	0.0835404	-0.0817882	-0.0310591	0.00522052	-0.224914	-0.0825683	0.665743	-0.191359	0.300954	-0.297222	0.116316	0.0871887	0.360996	0.164044	0.30051	0.657198	0.309451	0.259814	0.0839004	-0.311983	0.0149415	-0.00715271	-0.120504	-0.163528	0.16156	-0.28318	0.116076	0.317672	-0.107543	-0.0926853	-0.367345	-0.230171	-0.226043	-0.205161
Plasmenyl.PE.42.6	0.114035	0.0140174	0.188515	0.138458	-0.0139934	0.194275	0.207033	0.230831	-0.0652625	0.122676	0.166901	0.237564	-0.206937	0.212733	0.211161	0.237228	-0.0755356	0.0205101	0.0952655	0.0737834	0.2406	0.0175098	0.225911	0.216622	0.132949	0.258218	0.272019	0.277024	0.2845	0.112583	-0.0486289	0.290033	0.0837924	0.368953	0.258842	0.174065	0.28162	0.217942	0.0443204	-0.166793	0.332709	-0.0111731	-0.249349	0.312283	0.209061	0.291521	0.30429	0.2803	0.304506
Plasmenyl.PE.44.6	0.00519652	-0.0355836	-0.0039604	0.00285629	0.00670867	-0.0164656	0.020174	0.13673	0.0547735	0.1161	0.14051	0.0367717	0.271131	0.0890129	0.0379358	0.220246	-0.159892	0.11562	0.11526	0.08	0.0267267	0.224182	0.166937	0.274947	0.0952535	0.227363	0.195728	0.197204	0.144758	0.121536	0.0664266	0.221962	0.102634	0.039628	0.0719952	-0.029919	0.101038	0.101578	0.0375158	0.0617462	0.232907	-0.0625022	-0.0322352	0.13985	0.251941	0.215902	0.207297	0.237732	0.286481
PG.33.0	-0.208917	-0.152487	-0.172973	-0.206421	-0.133801	-0.153531	-0.165137	-0.152931	-0.127933	-0.122988	-0.190699	-0.155644	0.240324	0.0328593	-0.165905	0.114803	0.135422	0.145059	0.0628743	-0.213969	-0.0908371	-0.0476448	0.0834443	-0.189067	0.152175	-0.0823042	-0.152211	-0.143978	-0.124452	-0.0127813	-0.132685	-0.0983138	-0.0886889	-0.0677468	0.138938	0.0188899	0.0493609	0.150495	0.175134	0.00888089	0.12384	-0.143942	0.0158536	-0.0974617	0.0637744	-0.0461926	-0.0133213	0.0143294	0.0110891
PG.34.1	0.284356	0.208161	0.313627	0.260774	0.148779	0.344986	0.342082	0.369121	-0.0671707	0.168209	0.328797	0.331521	-0.0116532	0.404692	0.254689	0.28078	-0.31874	0.243216	0.136922	0.260618	0.328857	-0.173525	0.380642	0.21547	0.354671	0.407093	0.145635	0.152583	0.330981	-0.0463966	-0.320564	0.190855	-0.0846565	0.312259	0.487765	0.161488	0.393639	0.375422	0.395476	-0.328149	0.274371	-0.220282	-0.238032	0.372685	0.203876	0.267579	0.43958	0.396796	0.47988
PG.34.2	0.00963696	-0.00488449	0.0540294	0.069631	-0.0122412	0.0471287	0.113483	0.231983	-0.208641	-0.0410201	0.193363	0.0774557	-0.134209	0.231755	0.020042	0.270507	-0.292181	0.160048	0.0988419	0.277132	0.249397	-0.112811	0.279856	0.183594	0.328389	0.425815	0.1197	0.127873	0.304062	-0.0332193	-0.194971	0.143246	-0.0527933	0.0690789	0.324584	-0.0106931	0.279052	0.30009	0.251821	-0.211785	0.0948215	-0.279964	-0.204608	0.253225	0.238536	0.151059	0.261674	0.289481	0.309151
PG.36.0	-0.2433	-0.300738	0.174305	0.185647	-0.289217	0.107207	0.154671	0.172469	-0.186715	-0.0109691	0.0436124	3.60036e-05	-0.13781	0.0691029	-0.0245665	-0.10231	-0.070111	0.0786679	0.3173	0.0178818	0.208233	0.180798	0.293369	0.20288	0.246049	0.0664626	0.0984818	0.192799	0.134641	-0.0664146	0.0892769	0.117048	0.0811881	-0.00835283	0.0158776	-0.0586379	0.000528053	0.250381	0.020366	-0.142202	-0.0746715	-0.0288629	-0.176646	-0.070087	0.0772157	-0.0734593	0.0735794	-0.0080288	0.0684428
PG.36.1	-0.0167657	-0.0906931	0.146139	0.21625	-0.0676508	0.196952	0.259922	0.445797	-0.244908	0.0578338	0.37601	0.2027	-0.100522	0.27664	0.101986	0.265419	-0.228479	0.10381	0.213021	0.176166	0.305959	0.20492	0.407261	0.631335	0.328389	0.548515	0.370273	0.513423	0.470171	0.201008	0.173465	0.530525	0.276844	0.151575	0.170381	0.10129	0.317768	0.363324	0.335218	-0.127573	0.192019	-0.206433	-0.133585	0.363348	0.23628	0.19694	0.288785	0.292637	0.364752
PG.36.2	0.151695	0.0644464	0.232463	0.213609	0.0355476	0.224938	0.239304	0.318668	-0.147651	0.10087	0.246445	0.201848	-0.0184338	0.344314	0.14249	0.232607	-0.366145	0.168953	0.150939	0.128053	0.278668	-0.174077	0.411305	0.18219	0.440168	0.305431	-0.0206541	-0.0363396	0.130477	-0.17991	-0.45577	0.0125533	-0.0664266	0.232787	0.476952	0.126589	0.377954	0.382442	0.437672	-0.328989	0.299346	-0.200576	-0.295026	0.322868	0.252265	0.324608	0.507111	0.414749	0.503954
PG.36.3	0.0220342	0.00746475	0.0506931	0.0828083	0.0418602	0.0611941	0.0774677	0.250177	-0.151707	0.0242784	0.180006	0.100966	0.154431	0.236028	0.127153	0.369241	-0.206145	0.137966	0.177954	-0.0446325	0.240756	0.171473	0.266283	0.396844	0.282916	0.3982	0.0951215	0.251761	0.290633	-0.0621902	-0.089673	0.306103	0.0239904	0.0911011	0.25973	0.029535	0.348875	0.331077	0.294881	-0.212685	0.188839	-0.293765	0.0494209	0.324032	0.383162	0.290273	0.367177	0.266427	0.387519
PI.32.0	-0.0612661	-0.0249265	0.00772877	-0.00949295	-0.030147	-0.0381518	0.0689349	0.0470687	-0.00919292	0.089709	0.0731713	0.11946	0.0576898	0.202436	0.0810441	0.0736154	-0.089709	-0.000864086	0.0926013	0.153495	0.142526	0.248041	0.0150855	0.269751	-0.0841284	0.371245	0.264038	0.312079	0.34201	0.273423	0.370693	0.316976	0.266751	0.147963	-0.157396	-0.106319	-0.0342394	0.0618182	-0.0417282	0.2845	-0.283012	-0.0311071	0.114527	-0.0946175	0.0965257	-0.167093	-0.0712151	-0.0451125	-0.0489169
PI.34.1	0.138338	0.0421482	0.169445	0.0872127	-0.0133453	0.132349	0.15508	0.25931	-0.1591	0.112691	0.271263	0.169937	-0.132853	0.317792	0.0706631	0.104074	-0.0553495	0.0820402	-0.0323912	0.528857	0.334845	-0.236652	0.30177	0.106259	0.272715	0.300366	0.196436	0.0690909	0.301458	-0.0533213	-0.263426	0.0454365	-0.0627543	0.145143	0.284116	0.0370117	0.0823522	0.248137	0.271683	-0.170033	0.123492	-0.100294	-0.342214	0.129721	0.209373	0.246709	0.388419	0.390519	0.350411
PI.34.2	0.0632943	-0.0836364	0.222322	0.285425	-0.0916772	0.174473	0.284236	0.367129	-0.270219	0.0260306	0.361404	0.182274	0.0155416	0.395476	0.164068	0.457186	-0.379178	0.124872	0.239616	0.377414	0.298038	0.00250825	0.482064	0.479472	0.373249	0.597216	0.29643	0.315788	0.389439	0.106055	-0.0406361	0.292109	0.106703	0.268299	0.23736	0.178962	0.418362	0.363744	0.33685	-0.178134	0.148587	-0.131089	-0.139322	0.179262	0.329373	0.22213	0.385203	0.310447	0.417114
PI.36.1	-0.0986139	-0.133561	-0.0510051	-0.0375878	-0.192079	-0.0731713	-0.0679268	0.0758836	-0.109415	0.0156736	0.0564176	0.00705671	0.134449	0.359172	-0.111779	0.118524	-0.0361716	0.0246385	0.0572337	0.231131	0.192991	-0.0979298	0.233363	0.0441044	0.144122	0.16096	0.0838644	0.0456526	0.149751	-0.0269667	-0.215326	-0.040144	-0.104134	0.0510891	0.120768	-0.0813561	-0.00552055	0.268119	0.240804	-0.0120012	0.0120972	-0.0754155	-0.241644	0.0462646	0.227555	0.118176	0.246325	0.265155	0.216826
PI.36.2	0.0690549	-0.113855	0.380258	0.42285	-0.089901	0.315056	0.366625	0.389175	-0.292685	0.120732	0.42327	0.232991	-0.0520132	0.495254	0.223054	0.356532	-0.327813	0.0959376	0.337666	0.203108	0.252361	0.00814882	0.503258	0.490381	0.350207	0.447333	0.127465	0.248113	0.250657	0.000648065	-0.117888	0.178506	0.164692	0.330513	0.31502	0.295926	0.43586	0.450309	0.419898	-0.280348	0.0710111	-0.059946	-0.28156	0.211593	0.283744	0.224386	0.546775	0.411581	0.551947
PI.36.3	-0.26369	-0.170333	-0.131473	-0.00846085	-0.135446	-0.183666	-0.0748635	-0.184866	-0.113795	-0.04024	-0.0660306	-0.158092	-0.0677948	-0.0118092	-0.0990459	0.0242304	-0.105587	-0.120828	0.110483	-0.0637984	0.0838044	0.562304	-0.0537414	0.405257	-0.119796	0.210405	0.0611701	0.307123	0.270903	0.189907	0.534545	0.318596	0.248881	0.05967	-0.323888	0.0372997	0.0114491	0.0276388	0.00618062	0.136358	-0.329685	0.0670627	0.181182	-0.0469367	-0.00175217	-0.445737	-0.234671	-0.205785	-0.206553
PI.36.4	0.0924092	-0.0563576	0.235284	0.199292	-0.0520132	0.184602	0.24228	0.445797	-0.203108	0.0625863	0.34231	0.241608	-0.1612	0.368725	0.0692229	0.293465	-0.18027	0.101158	0.233399	0.542454	0.448605	-0.0757636	0.523468	0.359184	0.42351	0.51502	0.455686	0.42429	0.546871	0.303942	-0.0126973	0.402004	0.0152655	0.292037	0.202412	0.146919	0.211101	0.307399	0.30465	-0.0939934	0.174209	-0.0705311	-0.331737	0.233219	0.240372	0.256154	0.433099	0.475248	0.432991
PI.38.3	0.039652	-0.107075	0.244224	0.214437	-0.0957576	0.185287	0.230855	0.260522	-0.173525	0.0880888	0.293933	0.123936	-0.249217	0.395524	0.0875248	0.134149	-0.111743	0.00229223	0.169877	0.264194	0.303558	0.0374197	0.329325	0.309499	0.293921	0.238992	0.302166	0.127789	0.138326	0.0620222	-0.105683	0.148959	0.0148695	0.314959	0.208137	0.244668	0.141206	0.299382	0.221578	-0.115248	0.0308911	0.0119652	-0.365557	0.145863	0.293033	0.273663	0.452709	0.454041	0.434983
PI.38.4	0.0839604	-0.0940654	0.400444	0.398368	-0.0863846	0.324392	0.350447	0.532493	-0.266679	0.196208	0.371521	0.268851	-0.172013	0.432607	0.192799	0.267711	-0.25637	0.0327753	0.322448	0.204548	0.252085	0.0763036	0.538842	0.495614	0.387315	0.455326	0.33727	0.471983	0.421806	0.200612	0.0148335	0.417498	0.136214	0.37667	0.285004	0.295854	0.42375	0.387435	0.293861	-0.194503	0.217258	-0.0205701	-0.314419	0.275872	0.267183	0.299406	0.589559	0.49985	0.569037
PI.38.5	-0.171065	-0.252793	0.0611221	0.0884728	-0.256946	-0.0445725	0.0878368	0.25649	-0.334509	-0.0354275	0.0909571	0.0537534	-0.135662	0.207489	-0.105455	0.178506	-0.193519	0.0814401	0.220486	0.308527	0.246649	0.190171	0.392883	0.325845	0.337234	0.393387	0.295134	0.357624	0.475824	0.153375	0.0923012	0.337834	0.0552415	0.187735	0.049613	0.079616	0.178974	0.336562	0.247597	-0.0341674	0.0273387	0.020354	-0.231119	0.154899	0.124224	-0.00354035	0.250309	0.288713	0.263102
PI.38.6	0.0139694	-0.0760396	0.189895	0.162196	-0.118728	0.139178	0.196472	0.355092	-0.156712	0.0217822	0.187027	0.154899	0.0080408	0.303426	0.0259946	0.293429	-0.213057	0.183786	0.154743	0.346631	0.262598	0.0153135	0.444968	0.354707	0.33619	0.494377	0.378698	0.449745	0.545935	0.27964	0.0864086	0.474299	0.118248	0.290129	0.143774	0.0353435	0.262262	0.247993	0.236328	-0.0622022	0.195632	-0.0747675	-0.189451	0.19808	0.225035	0.13889	0.192499	0.261206	0.273807
PI.40.5	0.10045	-0.0949295	0.357492	0.328593	-0.138962	0.294617	0.330993	0.473771	-0.155332	0.191899	0.390699	0.286769	-0.0510291	0.525485	0.24276	0.28138	-0.169637	-0.0509091	0.295302	0.400252	0.353267	-0.0459286	0.565197	0.387339	0.349871	0.437936	0.34171	0.3552	0.373249	0.217294	0.0291749	0.286745	0.129841	0.385743	0.256934	0.216682	0.286829	0.365053	0.245245	-0.143354	0.180174	-0.0146655	-0.251221	0.190591	0.39982	0.347735	0.531149	0.448305	0.530453
PI.40.6	-0.109667	-0.118644	-0.050477	-0.105179	-0.169517	-0.05985	-0.0619862	0.00646865	-0.030099	0.0843924	0.0389679	-0.0420762	-0.286433	0.263546	-0.150759	-0.04024	-0.0321632	0.00624062	-0.00178818	0.250417	0.163192	-0.0572697	0.139322	0.11592	0.223102	0.0639064	0.171977	0.162124	0.256706	0.10447	-0.0979058	0.231551	-0.0920492	0.254605	0.178794	0.0777798	0.0306751	0.099934	0.134377	0.00489649	0.0634983	-0.0420642	-0.356244	0.0267147	0.0819082	0.0829883	0.206517	0.330717	0.152211
PS.36.0	0.229943	0.20378	0.164296	0.138302	0.168161	0.246241	0.23766	0.291413	0.151011	0.0984578	0.315092	0.209109	-0.0874647	0.234719	0.289721	0.164932	-0.104926	0.113855	0.0969217	0.244224	0.321272	-0.090441	0.215338	0.254797	0.250237	0.316952	0.482424	0.331905	0.251377	0.231359	-0.0487969	0.319892	0.0751635	0.229763	0.230771	0.256346	0.224098	0.130417	0.0476448	0.0337594	0.336994	-0.089649	-0.0581458	0.308983	0.473579	0.452565	0.286997	0.323912	0.357912
PS.38.4	-0.0528053	-0.0255386	-0.0512451	0.0106331	0.0376358	-0.0836724	0.00355236	0.00978098	0.0155296	-0.0113651	0.0624182	0.0381278	0.154887	-0.00208821	0.0957456	0.0974017	0.00874887	0.0321992	0.0765077	0.0249985	-0.0964056	0.220834	-0.169037	0.0269067	-0.241656	0.0236544	-0.0188899	0.188503	0.200276	0.214473	0.35616	0.131281	0.149631	0.146535	-0.185011	0.130765	0.142922	-0.219586	-0.224302	0.17847	-0.175782	-0.0317792	0.267315	-0.0249985	-0.0432043	-0.172997	-0.0946775	-0.132253	-0.0709631
SM.30.0	0.0168137	-0.0040084	0.0485689	0.151971	0.00609661	0.0809361	0.103798	0.280252	-0.0742874	0.0974137	0.155176	0.155392	0.193183	0.234299	0.166745	0.255974	-0.0040084	0.0934653	0.151419	0.186523	0.239352	0.1203	0.174749	0.244704	0.329997	0.30321	0.137702	0.1242	0.271791	-0.0112331	-0.162604	0.139766	-0.0245665	0.0440804	0.241044	-0.0377438	0.130801	0.198824	0.16486	-0.0349955	0.177102	-0.0593939	-0.190267	0.224506	0.249481	0.217318	0.349715	0.372349	0.313867
SM.30.1	-0.0627663	-0.0909571	0.00972097	0.0951935	-0.0686229	0.000744074	0.0248185	0.133393	-0.152871	0.0314911	0.0975338	0.0291029	0.0536574	0.166601	0.0652385	0.205965	-0.208353	0.112031	0.142862	0.260258	0.357468	0.219046	0.3248	0.4397	0.285029	0.461926	0.333849	0.266079	0.473783	0.0671227	0.0770477	0.381818	-0.0213621	-0.00740474	0.0977258	-0.0910411	0.177618	0.277576	0.160816	0.0194419	-0.0350795	-0.210069	-0.0566817	0.248509	0.349847	0.0539094	0.281632	0.258662	0.314191
SM.30.2	-0.28246	-0.417474	0.107219	0.227363	-0.362604	0.049937	0.149499	0.328449	-0.426847	-0.0651785	0.0694749	0.0581698	0.226139	0.182898	-0.0191659	0.289913	-0.183582	0.0811281	0.523996	0.0592499	0.202904	0.306847	0.515044	0.498134	0.414605	0.479376	0.234587	0.270639	0.324524	0.030171	0.0977858	0.308875	0.174245	-0.0447525	0.0888089	-0.0435884	0.174821	0.480972	0.327069	-0.0308311	0.0313711	0.0424122	-0.118236	0.0452085	0.175914	0.0718632	0.265047	0.165053	0.304482
SM.31.1	-0.172181	-0.0781398	-0.191335	-0.0781998	-0.0819082	-0.186451	-0.173297	-0.156844	0.0149655	-0.0712031	-0.116652	-0.18315	0.0659346	-0.0590099	-0.122964	0.0338074	-0.0251785	-0.010081	-0.0331113	-0.0611461	0.0925053	0.619742	-0.131917	0.390951	-0.147207	0.199544	0.175878	0.387471	0.387663	0.176502	0.621554	0.462598	0.234011	-0.0189979	-0.360396	-0.109787	-0.119604	-0.0726793	-0.0775518	0.161524	-0.351275	0.105371	0.242916	0.0521452	0.0307111	-0.316676	-0.170021	-0.111779	-0.128089
SM.32.0	-0.0453405	-0.104746	0.0410201	0.0518452	-0.143774	0.0149295	0.0220822	0.0265107	-0.10003	0.0514611	0.0745395	-0.0683588	0.0313711	0.189139	0.0175698	0.12048	-0.108215	0.158548	0.100666	0.115584	0.206637	0.186019	0.114683	0.194551	0.11508	0.209085	0.205821	0.230639	0.285581	0.127309	0.0649985	0.169589	0.0994059	0.122844	0.120336	0.0676148	0.104326	0.219886	0.113327	0.135098	0.0210741	0.0661986	-0.0118932	0.0486769	0.29805	0.0748035	0.255074	0.309223	0.234347
SM.32.1	-0.00981698	-0.115908	0.102838	0.124968	-0.147543	0.0943654	0.0744674	0.295794	-0.135098	-0.0618662	0.282556	0.089865	0.117	0.476508	0.039688	0.363672	-0.229175	0.156676	0.194683	0.368041	0.363636	0.124488	0.405353	0.426991	0.349931	0.494065	0.441896	0.380498	0.519628	0.213177	0.030015	0.42369	0.0821242	0.215806	0.157384	0.0853285	0.192451	0.394983	0.351719	0.0669787	0.13871	-0.127633	-0.280324	0.287933	0.366421	0.306139	0.499034	0.56438	0.553219
SM.32.2	0.0591539	-0.0766517	0.158968	0.205209	-0.0634383	0.171533	0.209325	0.438332	-0.275884	-0.0128413	0.302646	0.235068	0.070291	0.301242	0.133297	0.381278	-0.251437	0.178602	0.307375	0.359652	0.365029	0.0760756	0.524296	0.519076	0.406973	0.596232	0.403744	0.379478	0.590099	0.132109	-0.0220942	0.454821	0.114443	0.0812481	0.170333	0.0557936	0.289061	0.396256	0.389091	-0.152859	0.249253	-0.108731	-0.239268	0.366181	0.314815	0.363372	0.542022	0.411005	0.530921
SM.33.1	-0.00447645	-0.0960696	0.133909	0.155728	-0.124296	0.120204	0.0883528	0.286961	-0.105299	-0.0533933	0.301986	0.0681668	0.139754	0.506847	0.0270987	0.295386	-0.215938	0.0876088	0.174857	0.252661	0.334689	0.197828	0.359424	0.465803	0.318992	0.457174	0.356676	0.406517	0.46351	0.193207	0.0950255	0.447633	0.14267	0.234803	0.127381	0.109799	0.172361	0.388779	0.313687	0.0774797	0.1245	-0.121224	-0.170237	0.262418	0.402016	0.287189	0.464782	0.547627	0.532433
SM.33.2	0.161824	0.122352	0.125605	0.0983858	0.112643	0.150195	0.0383558	0.114959	0.0675068	0.113027	0.115308	0.0781638	0.0749355	0.28186	0.0928053	0.190795	-0.0541014	0.131845	-0.0361116	0.179694	0.17553	0.14447	0.0813561	0.274083	0.140366	0.206169	0.300726	0.264494	0.360348	0.100342	-0.00831683	0.349463	0.0369277	0.122832	0.209589	0.0952175	0.140054	0.134113	0.177042	0.0415242	0.284824	-0.0853165	-0.219646	0.31502	0.35838	0.354263	0.37817	0.471719	0.391311
SM.34.0	0.165365	0.125425	0.108839	0.154347	0.110255	0.140174	0.104098	0.0951935	0.22195	0.0849205	0.208773	0.099766	0.0454965	0.249121	0.306415	0.0784038	8.40084e-05	0.0634983	-0.0463486	0.0924092	0.0709871	0.0809841	0.0927093	0.0631743	-0.0476448	0.0491689	0.165809	0.090105	-0.0358956	0.107627	0.0475128	-0.0153615	0.0473087	0.119664	0.0849325	0.193915	0.0490009	-0.0249385	-0.0813681	0.181266	0.0829883	-0.134701	0.106595	-0.0513891	0.320612	0.252109	0.1603	0.151659	0.178386
SM.34.1	0.263354	0.166913	0.290297	0.302922	0.126769	0.290633	0.265983	0.252037	0.151767	0.184518	0.384242	0.170345	0.019778	0.561452	0.357132	0.35604	-0.151899	0.0642304	0.0458806	0.228887	0.176814	0.136034	0.19628	0.431239	0.187267	0.418926	0.460906	0.429895	0.300126	0.39514	0.132901	0.391551	0.163828	0.405425	0.136382	0.381866	0.301686	0.0240864	0.0780798	0.0940174	0.205209	-0.114395	-0.143954	0.266667	0.445341	0.3967	0.470495	0.52018	0.460354
SM.34.2	0.125185	-0.0568617	0.34303	0.369913	-0.0723912	0.316544	0.338266	0.447201	-0.128821	0.103246	0.368065	0.246085	0.0654425	0.555404	0.261926	0.450249	-0.217246	0.134557	0.286013	0.264854	0.265407	0.0913531	0.476124	0.573333	0.345827	0.56492	0.509127	0.51796	0.431503	0.302142	0.0847765	0.493225	0.179082	0.343654	0.249193	0.292769	0.381566	0.36474	0.296514	0.0327393	0.290189	-0.162712	-0.269955	0.340354	0.434851	0.424134	0.574437	0.54471	0.587567
SM.34.3	0.226355	0.195248	0.129277	0.0931773	0.136682	0.164416	0.0679148	0.211041	0.0816082	0.134965	0.080108	0.17835	0.0564536	0.263594	0.156736	0.079748	-0.104338	0.158308	-0.129289	0.119208	0.129805	-0.193891	0.178266	0.0144014	0.332049	0.210297	0.019694	-0.0165737	0.0917492	-0.147123	-0.417894	0.0219382	-0.163996	0.0487489	0.576322	-0.0279628	0.210477	0.187759	0.295926	-0.236472	0.415374	-0.288041	-0.201848	0.408797	0.280216	0.390843	0.377318	0.464566	0.350651
SM.35.0	-0.151167	-0.106619	-0.238176	-0.230699	-0.132157	-0.200624	-0.260966	-0.392751	0.193399	0.00948095	-0.144098	-0.263846	0.0573657	-0.0260906	-0.111035	-0.0958296	0.116292	-0.23736	-0.100618	-0.0276268	0.0120492	0.160252	-0.279976	-0.146187	-0.249349	-0.38417	0.0314551	-0.17883	-0.162028	0.0809241	0.174497	-0.0994899	-0.0466487	-0.0351995	-0.341914	-0.0141134	-0.336202	-0.224806	-0.194119	0.423342	-0.122292	0.216718	-0.00117612	-0.301206	0.019922	-0.0221422	-0.0646025	0.0152175	-0.134137
SM.35.2	0.172265	0.134473	0.135218	0.170057	0.100354	0.190915	0.0887969	0.205497	0.0437084	0.170453	0.148551	0.0981458	0.0442004	0.289253	0.0546175	0.132865	-0.237996	0.101722	0.0628503	0.0170777	0.125989	0.167981	0.135302	0.288653	0.299622	0.235476	0.0820882	0.181206	0.213381	0.0193819	-0.124104	0.229343	0.0628263	0.287045	0.327237	0.111323	0.255326	0.157252	0.337654	-0.0812721	0.275188	-0.049733	-0.221758	0.287825	0.241104	0.254557	0.367441	0.406961	0.3642
SM.36.0	0.211665	0.120804	0.249361	0.236676	0.159628	0.310927	0.252625	0.259562	0.0785239	0.105923	0.371413	0.197936	-0.0841164	0.360528	0.397264	0.248677	-0.165437	-0.0208461	0.167717	0.0968137	0.28498	0.113927	0.230663	0.444716	0.194491	0.313447	0.44378	0.369397	0.238476	0.218842	0.090165	0.355224	0.200852	0.317492	0.206277	0.357156	0.304122	0.174629	0.0486769	-0.0386799	0.295314	-0.190123	-0.080492	0.293129	0.514191	0.598056	0.486481	0.429295	0.471083
SM.36.1	0.178218	-0.0267027	0.420234	0.430447	0.0370357	0.438056	0.377174	0.49883	-0.0513411	0.219646	0.438956	0.318692	0.089901	0.409325	0.390015	0.3555	-0.145851	-0.0184338	0.291377	-0.050177	0.163372	0.0294029	0.486637	0.608005	0.233363	0.37913	0.248185	0.412781	0.214353	0.0706631	0.0223222	0.385863	0.255026	0.176958	0.237936	0.226991	0.313603	0.313375	0.170045	-0.133285	0.429535	-0.156544	-0.146511	0.282148	0.444632	0.649865	0.590879	0.417618	0.59634
SM.36.2	0.175842	-0.0175818	0.444368	0.443168	0.0313231	0.419706	0.391683	0.566757	-0.189355	0.14207	0.379142	0.362016	0.0259706	0.42051	0.345059	0.35682	-0.264974	0.124872	0.320816	0.0445845	0.206757	-0.0562496	0.567045	0.564332	0.361176	0.536934	0.311791	0.449865	0.330849	0.112175	-0.110279	0.418254	0.245004	0.238668	0.430975	0.272643	0.495962	0.394071	0.282256	-0.250309	0.422886	-0.239736	-0.229343	0.407285	0.392547	0.571569	0.600036	0.466883	0.622382
SM.36.3	-0.0388239	-0.227159	0.362052	0.418074	-0.166025	0.323036	0.362424	0.583414	-0.37511	0.0281788	0.406913	0.273171	0.0984938	0.404608	0.194527	0.339946	-0.309931	0.0162496	0.435884	0.0887009	0.235308	0.13541	0.632655	0.678944	0.350171	0.60084	0.317864	0.441032	0.379154	0.069751	0.0465887	0.401716	0.345143	0.120696	0.280528	0.183474	0.42195	0.53631	0.424842	-0.186523	0.257018	-0.168461	-0.142082	0.351863	0.310351	0.428707	0.536994	0.324392	0.557564
SM.36.4	-0.0690909	-0.219442	0.134401	0.220486	-0.182586	0.0908251	0.138698	0.275752	-0.3597	-0.12018	0.202304	0.0408761	0.0515692	0.189079	-0.0584578	0.196988	-0.325029	-0.0469367	0.432283	0.0882568	0.220762	0.102814	0.41583	0.470063	0.159664	0.333945	0.203336	0.282796	0.308767	-0.0138134	0.0375998	0.318956	0.209925	0.16294	0.106499	0.0579418	0.231767	0.356328	0.410309	-0.12084	0.0584218	-0.135902	-0.168725	0.155872	0.125305	0.175158	0.344494	0.208077	0.373729
SM.37.0	0.142526	0.0551215	0.17943	0.157	0.0485809	0.245233	0.112931	0.271515	-0.0669307	0.132001	0.237444	0.192091	0.0432043	0.305971	0.192895	0.0773237	-0.277816	0.106691	0.00189619	0.100714	0.248101	-0.175074	0.350471	0.0841524	0.497546	0.171713	0.000324032	-0.0727753	0.113915	-0.219886	-0.468143	-0.0639904	-0.0806961	0.0387879	0.579334	0.0114851	0.230279	0.332133	0.29715	-0.237576	0.475212	-0.240312	-0.314131	0.383258	0.360048	0.559568	0.595824	0.514527	0.557636
SM.37.1	-0.32	-0.515716	0.14051	0.242292	-0.491173	0.102586	0.159616	0.371809	-0.48252	-0.141554	0.2039	0.133585	0.211821	0.264422	-0.0608581	0.289109	-0.250525	-0.0124452	0.51952	-0.0217342	0.260234	0.257678	0.593087	0.560072	0.428263	0.374137	0.236928	0.305755	0.341206	-0.0349835	0.0858566	0.371437	0.235092	0.0565257	0.144554	0.0336754	0.194659	0.597504	0.431479	-0.0776118	0.174629	0.050381	-0.233003	0.145851	0.229571	0.276988	0.405461	0.314719	0.465299
SM.37.2	-0.149607	-0.194407	0.02003	0.11628	-0.180798	0.019538	0.00817282	0.00280828	-0.0482088	-0.0460606	0.131389	-0.0736034	0.0516772	0.291173	-0.0159856	0.142238	-0.174101	0.0192859	0.207489	-0.0872607	0.153975	0.346247	0.134521	0.397672	0.0906811	0.109031	0.187807	0.243924	0.135914	0.266139	0.216358	0.302226	0.308479	0.181074	-0.0432643	0.203924	0.0663066	0.0163696	0.10171	0.189955	-0.0189379	-0.0349955	-0.108239	0.119064	0.217306	0.144638	0.114467	0.185491	0.164392
SM.37.3	-0.128293	-0.214521	0.118224	0.179658	-0.18201	0.137054	0.108479	0.26393	-0.300642	-0.0463006	0.147891	0.148587	-0.125209	0.185611	0.0436244	0.0487729	-0.134905	-0.117852	0.294065	-0.0885569	0.228959	0.158056	0.331017	0.398788	0.270399	0.281152	0.0727993	0.180594	0.16138	-0.165461	-0.0147015	0.202904	0.298878	-0.108911	0.153555	-0.0163576	0.117336	0.371605	0.345455	-0.22363	0.0843684	-0.166457	-0.249985	0.126997	0.112067	0.203228	0.311047	0.139082	0.229331
SM.38.0	-0.0415242	-0.222658	0.240888	0.253465	-0.16342	0.248449	0.265707	0.421038	-0.193567	0.070087	0.239292	0.22177	0.115776	0.373549	0.10141	0.366949	-0.142874	0.0452805	0.360768	0.228323	0.253081	-0.00654065	0.477972	0.413861	0.421782	0.338902	0.292229	0.265863	0.296562	-0.0562976	-0.0263546	0.292841	0.0787639	0.134545	0.245521	0.111899	0.257246	0.492865	0.375698	-0.105767	0.299826	-0.186715	-0.247393	0.239052	0.311491	0.431383	0.545503	0.437828	0.59994
SM.38.1	0.127405	-0.102778	0.44432	0.477156	-0.0525893	0.431071	0.425575	0.592607	-0.200756	0.0782358	0.473615	0.352271	0.138638	0.573261	0.295602	0.467879	-0.298482	0.0924452	0.41859	0.170753	0.327573	0.049553	0.638308	0.646397	0.372073	0.626487	0.381026	0.45691	0.432487	0.0787039	-0.0247225	0.483276	0.250561	0.249973	0.329769	0.241824	0.465743	0.520264	0.406913	-0.155692	0.248785	-0.205125	-0.270747	0.371761	0.420786	0.51628	0.66369	0.513111	0.7203
SM.38.2	0.0320072	-0.10447	0.287705	0.358872	-0.0607861	0.281236	0.261326	0.165569	0.00984098	0.151491	0.198932	0.0888329	0.0966937	0.372601	0.263966	0.247093	-0.0705551	0.00589259	0.282112	-0.118044	-0.0158656	0.29685	0.142322	0.527369	0.0887489	0.219814	0.284692	0.353291	0.0971857	0.237048	0.258086	0.353255	0.316316	0.248089	0.0492049	0.333129	0.193279	0.0708791	0.0545575	0.173609	0.0410321	0.0271227	-0.0932733	0.0716952	0.306127	0.26147	0.301086	0.271287	0.282304
SM.38.3	0.0359316	-0.0577018	0.205833	0.339322	-0.0424482	0.252541	0.258158	0.284176	-0.173333	0.100162	0.330849	0.16294	0.172289	0.293477	0.300042	0.255482	-0.25919	-0.0486889	0.383258	-0.0877168	0.190663	0.287417	0.320168	0.538974	0.0722832	0.304158	0.141122	0.251389	0.0686229	0.0283588	0.143642	0.225239	0.352883	0.11688	0.0361116	0.253969	0.319256	0.24036	0.190579	-0.0526133	0.115776	-0.0780558	-0.00357636	0.124284	0.298566	0.250153	0.263006	0.0626703	0.305251
SM.38.4	-0.130609	-0.282592	0.170597	0.252181	-0.224218	0.174209	0.243552	0.415638	-0.428575	-0.0341434	0.324176	0.239628	0.00794479	0.24132	0.166637	0.294089	-0.321596	0.0608461	0.388395	0.0709391	0.207813	0.0793519	0.550159	0.561428	0.386067	0.489121	0.274143	0.309043	0.295506	-0.00817282	-0.020018	0.297858	0.267183	-0.0224662	0.29703	0.107675	0.364692	0.510555	0.345851	-0.27526	0.278452	-0.0729313	-0.100642	0.282256	0.282916	0.38051	0.468611	0.207441	0.459154
SM.38.5	-0.232547	-0.236616	-0.0270387	0.0529013	-0.242064	-0.0580738	-0.00290429	0.0762316	-0.273831	-0.13937	0.0340474	-0.206613	-0.0111491	0.0893609	-0.0835524	0.111131	-0.0817642	0.0135374	0.22303	-0.0986379	0.0649145	0.530249	0.0714791	0.454209	0.090417	0.284356	0.251689	0.452373	0.302154	0.145899	0.425323	0.467627	0.389967	0.0372757	-0.109199	0.119232	0.119664	0.0931653	0.18087	0.069547	-0.0837924	0.0161536	0.165929	0.0376958	0.08042	-0.0851845	0.0786199	0.00490849	0.059694
SM.39.1	0.581038	0.660618	0.171113	0.13895	0.611869	0.271155	0.126349	0.0628383	0.5248	0.155296	0.139454	0.179394	0.0560336	0.222394	0.299226	0.0553015	0.00624062	0.17559	-0.304182	0.102226	0.0337954	0.0235584	-0.171209	0.121776	-0.0607141	0.153687	0.172661	0.174953	0.249229	0.0435043	-0.0886289	0.20438	0.0441884	0.227315	0.0694869	0.173273	0.140378	-0.173201	0.00358836	0.0767477	0.181278	-0.0916292	-0.0822682	0.293813	0.230579	0.239892	0.199988	0.374473	0.19802
SM.39.2	-0.270063	-0.223162	-0.0988419	0.0358956	-0.193171	-0.128437	-0.0974497	-0.0794719	-0.120816	-0.105383	-0.070411	-0.172445	0.126757	-0.0690909	-0.100282	0.00289229	-0.0913291	-0.0672547	0.121284	-0.170069	-0.0226103	0.735001	-0.0322832	0.478992	-0.105155	0.20282	0.145995	0.471119	0.366517	0.214521	0.717972	0.492109	0.391575	-0.0130933	-0.399844	0.00170417	-0.0316592	-0.0284788	-0.0348395	0.189199	-0.249673	0.177606	0.235584	0.0118332	0.009973	-0.300354	-0.132277	-0.129925	-0.0923012
SM.39.3	-0.170381	-0.306343	0.14129	0.250477	-0.278176	0.140774	0.170045	0.391947	-0.40294	-0.0868407	0.287189	0.185227	0.0222022	0.226835	0.100258	0.325821	-0.4358	-0.0442244	0.493453	0.0289709	0.332277	0.211965	0.58333	0.563372	0.293849	0.408953	0.227519	0.385767	0.387471	0.128917	0.11556	0.354467	0.286805	0.0650345	0.0962616	0.0461806	0.278872	0.424326	0.307963	-0.183474	0.200876	-0.00483648	-0.148083	0.152643	0.262874	0.298494	0.409349	0.209565	0.404752
SM.40.1	-0.0328713	-0.174173	0.225935	0.280792	-0.197912	0.153627	0.21691	0.283744	-0.0611941	-0.00650465	0.257234	0.128365	0.0283708	0.46195	0.0879448	0.340474	-0.1161	0.0812481	0.215986	0.196076	0.121632	0.125869	0.324608	0.368125	0.239904	0.428263	0.432895	0.301698	0.261278	0.228995	0.0346235	0.282004	0.115224	0.291413	0.197564	0.212925	0.241896	0.332061	0.232967	0.163036	0.0176658	-0.0243024	-0.281752	0.187927	0.26195	0.253561	0.425539	0.514395	0.471827
SM.40.2	0.380126	0.364404	0.268875	0.253489	0.320732	0.276796	0.212781	0.0986979	0.328857	0.187699	0.205341	0.134293	0.0185659	0.433711	0.294821	0.110939	-0.0853405	0.175842	-0.122964	0.228587	0.0610021	0.0989979	-0.0126373	0.2752	0.0346595	0.249937	0.401596	0.310723	0.298098	0.241704	0.0590819	0.325761	0.0823882	0.422526	0.0831563	0.364092	0.228599	-0.0838644	-0.0070447	0.18225	0.049925	-0.103582	-0.215014	0.276952	0.278308	0.228635	0.305659	0.495602	0.311371
SM.40.3	0.0366037	-0.0578458	0.0886649	0.190243	-0.0905731	0.119916	0.0885569	0.050045	0.0477288	0.090153	0.185395	0.050201	0.0970777	0.290189	0.242868	0.210489	-0.210561	0.0179418	0.102598	0.0373837	0.0588779	0.38387	0.0633303	0.447765	0.0214341	0.188527	0.326589	0.279868	0.136382	0.258206	0.286457	0.298014	0.30453	0.201332	0.00385238	0.211869	0.172517	-0.00412841	-0.0423042	0.217894	0.0856646	0.0187699	-0.0020402	0.0374437	0.377198	0.281452	0.280612	0.193843	0.234191
SM.40.4	-0.0139694	-0.136022	0.11652	0.225755	-0.0894449	0.124716	0.164764	0.234311	-0.212313	0.0441044	0.230903	0.120684	0.235512	0.233435	0.211017	0.238536	-0.272403	-0.0090489	0.408989	-0.00686469	0.196592	0.268431	0.372661	0.489769	0.149271	0.345167	0.109883	0.220318	0.140246	0.0480528	0.153507	0.245701	0.29529	-0.010285	0.0341194	0.0659706	0.201884	0.186763	0.090369	-0.0470327	0.177054	-0.000576058	0.0307111	0.0747675	0.30021	0.274011	0.274863	0.0232463	0.238896
SM.40.5	-0.0683468	-0.212541	0.0819082	0.123384	-0.182646	0.0756556	0.0527573	0.242412	-0.352847	-0.0443804	0.1567	0.0714671	-0.0537294	0.143546	-0.0335674	0.123816	-0.324644	-0.0764476	0.312043	0.0963216	0.179106	0.0832523	0.36246	0.386235	0.123072	0.234743	0.187519	0.272355	0.294917	-0.00888089	0.0579658	0.275044	0.215026	0.0892049	0.0677948	0.099886	0.215146	0.310843	0.306331	-0.133717	0.102214	-0.0323192	-0.114275	0.190087	0.104038	0.267699	0.356196	0.188791	0.308215
SM.40.6	-0.0971017	-0.25913	0.163216	0.214197	-0.224866	0.146763	0.183018	0.447201	-0.345527	-0.0468287	0.328881	0.250693	0.020042	0.265971	0.0436724	0.277972	-0.27622	0.0676868	0.438548	0.245077	0.299574	0.0709271	0.571041	0.482112	0.402148	0.504398	0.36	0.459118	0.580354	0.184578	0.0742634	0.470567	0.257138	0.106235	0.113759	0.0560456	0.288929	0.443672	0.291653	-0.0839244	0.21697	-0.0135494	-0.265071	0.36024	0.198884	0.315632	0.455026	0.301482	0.463078
SM.41.1	0.0739754	-0.12306	0.36054	0.419514	-0.112331	0.335146	0.349523	0.631587	-0.280024	-0.00529253	0.411401	0.331809	0.0969457	0.460522	0.170513	0.408137	-0.276268	0.129433	0.365965	0.185035	0.319664	0.161164	0.631275	0.594383	0.445005	0.644584	0.359412	0.452757	0.476328	0.0648065	-0.0424482	0.450021	0.218326	0.187675	0.327141	0.132829	0.390159	0.545803	0.485665	-0.193147	0.319532	-0.110939	-0.291545	0.403384	0.313003	0.438224	0.633579	0.579334	0.706799
SM.41.2	0.596136	0.620522	0.234455	0.202532	0.563264	0.346367	0.194707	0.18237	0.411797	0.215914	0.216298	0.231407	0.0276628	0.305239	0.387147	0.114815	-0.0469607	0.106475	-0.152451	0.122076	0.119652	-0.0123972	0.0171617	0.24162	0.0487129	0.263366	0.209889	0.272115	0.285389	0.118044	-0.0893849	0.266343	0.10411	0.243132	0.12456	0.199892	0.237696	-0.0818602	0.0944374	-0.019718	0.383894	-0.117084	-0.0437444	0.349019	0.340294	0.346499	0.303978	0.307987	0.269775
SM.41.3	0.0747435	-0.0236544	0.203252	0.246409	-0.0778878	0.202604	0.176802	0.321524	-0.0387759	0.0507051	0.323024	0.118488	0.127117	0.45565	0.151731	0.155824	-0.26141	0.0131893	0.15694	0.244248	0.242892	0.191095	0.299214	0.427411	0.301386	0.33925	0.373573	0.380726	0.340882	0.207465	0.140294	0.361968	0.211557	0.269139	0.113351	0.218266	0.23502	0.170021	0.211281	0.117912	0.264074	-0.0487849	-0.157336	0.279904	0.329001	0.32432	0.415266	0.480648	0.4382
SM.41.5	-0.210009	-0.160708	-0.0860846	0.0285149	-0.13655	-0.105143	-0.0825803	-0.150063	-0.05985	-0.0634743	-0.0790399	-0.185599	0.0583618	-0.0961536	-0.0740234	-0.089697	-0.10027	-0.109643	0.0994179	-0.174941	0.00681668	0.663666	-0.0644824	0.33601	-0.176394	0.0492769	0.0971977	0.325641	0.247297	0.246121	0.624422	0.402136	0.353579	0.00913291	-0.324704	0.0117852	-0.0547735	-0.120804	-0.174821	0.214809	-0.284428	0.156604	0.258686	-0.121716	-0.0231383	-0.250537	-0.202052	-0.218458	-0.195224
SM.41.6	-0.187903	-0.130585	-0.127981	-0.00685268	-0.115608	-0.14249	-0.110135	-0.178398	-0.0420762	-0.040288	-0.099934	-0.226559	0.00351635	-0.139814	-0.0839844	-0.0587459	0.0677708	-0.0942214	0.0755236	-0.166733	-0.049625	0.480888	-0.150819	0.244308	-0.227831	0.049841	0.0283108	0.239532	0.0859886	0.231491	0.607381	0.225491	0.317336	0.0440804	-0.530201	0.00174017	-0.133153	-0.164812	-0.180378	0.266319	-0.347807	0.301662	0.186691	-0.233555	-0.0385959	-0.349331	-0.273051	-0.280912	-0.28228
SM.42.0	0.226079	0.10099	0.259874	0.147315	0.145887	0.31538	0.20048	0.190087	0.127129	0.151299	0.38417	0.199916	-0.0364476	0.409097	0.269559	0.173669	-0.103282	0.0457606	0.0489889	0.302946	0.171449	-0.1206	0.17823	0.137738	0.169817	0.118836	0.272211	0.113219	0.0964896	0.0918932	-0.0948455	0.169253	0.0139574	0.229823	0.1564	0.271155	0.105179	0.0692949	0.0220702	0.00595259	0.30393	-0.164704	-0.233771	0.104974	0.306091	0.611629	0.567693	0.523216	0.501842
SM.42.1	-0.039784	-0.167885	0.250633	0.279328	-0.172589	0.193411	0.248749	0.339118	-0.0855446	-0.0070327	0.274563	0.134773	0.0264986	0.497642	0.147495	0.398152	-0.187663	0.0808401	0.211677	0.170285	0.0920972	0.167957	0.337594	0.415962	0.233279	0.490765	0.410441	0.397456	0.298194	0.251917	0.122376	0.397396	0.169289	0.307951	0.229067	0.246997	0.329349	0.344446	0.216106	0.0358956	0.0205341	-0.0961896	-0.239016	0.268047	0.25895	0.279184	0.46411	0.495878	0.533249
SM.42.2	0.146103	-0.0374917	0.3597	0.390003	0.00336034	0.395992	0.36174	0.500882	-0.111755	0.169637	0.495854	0.273459	0.0929133	0.589631	0.348503	0.41631	-0.250477	0.0181338	0.410309	0.117516	0.287237	0.0782958	0.573513	0.625299	0.251425	0.506919	0.314875	0.429595	0.287285	0.12036	0.0158896	0.46339	0.224122	0.222106	0.248677	0.249625	0.409577	0.431707	0.304062	-0.166577	0.343762	-0.255038	-0.145731	0.327489	0.456814	0.550663	0.642688	0.40126	0.652781
SM.42.3	0.137402	-0.00475247	0.356484	0.406349	0.00440444	0.371497	0.387591	0.473075	-0.178026	0.158092	0.442232	0.311575	0.089829	0.440576	0.441404	0.42267	-0.384446	0.0524572	0.393159	0.0709751	0.267927	0.12222	0.517072	0.649745	0.315908	0.573033	0.332853	0.47802	0.331989	0.20462	0.117192	0.462718	0.276016	0.240672	0.213741	0.274335	0.477912	0.333477	0.268983	-0.237948	0.297774	-0.16456	-0.0687549	0.374893	0.405257	0.425899	0.552379	0.315044	0.562412
SM.42.4	0.0866847	-0.0811161	0.292529	0.364776	-0.0470207	0.301554	0.323072	0.443552	-0.149631	0.162508	0.440168	0.235056	0.167861	0.407585	0.397636	0.323804	-0.297066	0.0169337	0.395656	0.0940534	0.298998	0.187699	0.492409	0.637156	0.250309	0.508971	0.304158	0.430831	0.288149	0.255626	0.175662	0.406649	0.279592	0.169877	0.111095	0.197132	0.353687	0.260918	0.195656	-0.0786559	0.241788	-0.122052	-0.0668587	0.251053	0.382022	0.404836	0.460378	0.22465	0.463414
SM.42.5	0.169421	0.0219862	0.248617	0.280516	0.0151335	0.256286	0.255506	0.234095	0.0185899	0.18009	0.257882	0.127693	-0.0620822	0.246817	0.371965	0.17565	-0.113327	-0.0972577	0.180786	-0.0258626	-0.0217702	0.100678	0.101986	0.341014	-0.0348395	0.129949	0.206325	0.274023	-0.0356796	0.237648	0.223378	0.189043	0.371725	0.228971	0.0345515	0.324872	0.250249	-0.0836004	-0.112583	0.0551695	0.247741	0.0449085	0.0922292	0.0716592	0.247201	0.365185	0.273903	0.0924812	0.222442
SM.42.6	-0.0911491	-0.2424	0.173165	0.205497	-0.179754	0.155116	0.172841	0.268623	-0.26237	0.0488809	0.227531	0.0517372	-0.0367597	0.167465	0.174089	0.139814	-0.188779	-0.0644704	0.38405	-0.0872847	0.0345034	0.0722592	0.334917	0.359796	0.0623822	0.150771	0.0959016	0.252289	0.0494929	0.132457	0.133849	0.160504	0.309991	0.101446	0.0287909	0.15802	0.198044	0.189331	0.0667027	-0.0674707	0.236004	-0.00266427	-0.0461446	0.0761356	0.142802	0.27964	0.289769	0.039856	0.246673
SM.42.7	0.0933693	-0.079736	0.29577	0.324236	-0.0663666	0.272967	0.329757	0.488233	-0.294125	0.0467567	0.348911	0.368641	-0.138734	0.254425	0.262814	0.279412	-0.179466	0.0918332	0.285004	0.223654	0.342226	-0.0284908	0.495098	0.478044	0.309715	0.524752	0.339886	0.434083	0.5212	0.0784638	-0.0111011	0.441092	0.211197	0.154996	0.164884	0.112223	0.343966	0.392031	0.191719	-0.25997	0.285677	-0.0468407	-0.223042	0.437792	0.236688	0.395704	0.447393	0.266703	0.461926
SM.43.1	-0.0983378	-0.163336	0.0735794	0.14033	-0.150039	0.111455	0.0984698	0.369817	-0.191611	-0.0619262	0.279028	0.151335	0.10279	0.37973	0.0647225	0.312655	-0.243228	-0.00778878	0.280132	0.0251305	0.234299	0.321908	0.403204	0.536934	0.32042	0.460474	0.276304	0.43502	0.428947	0.0878248	0.130477	0.499622	0.258566	0.120228	0.17847	0.107915	0.291293	0.531917	0.366277	-0.0948455	0.172721	-0.0276628	-0.179298	0.335482	0.31676	0.367345	0.55502	0.429787	0.593387
SM.43.2	0.00562856	-0.0564176	0.119844	0.172421	-0.0585419	0.208701	0.0934173	0.302082	-0.122328	-0.00517252	0.215062	0.132721	0.0731473	0.320888	0.116232	0.187759	-0.233387	-0.0535494	0.283804	-0.0955536	0.20186	0.283576	0.351419	0.462106	0.251137	0.280528	0.18225	0.316868	0.230687	0.0279988	0.0746835	0.387951	0.247801	0.135854	0.153447	0.171413	0.26021	0.354227	0.340942	-0.200996	0.320336	-0.0245785	-0.110459	0.246865	0.343054	0.421074	0.497918	0.347507	0.493525
SM.43.3	0.31628	0.455458	-0.0777318	-0.0733753	0.395872	0.0706151	-0.0765077	-0.231035	0.505527	0.0861326	0.0482688	-0.00988899	0.0833843	0.107855	0.274659	-0.0650225	-0.000576058	0.0264866	-0.264158	-0.0462766	-0.0271827	0.193315	-0.32126	0.0794959	-0.116292	-0.0643144	0.120048	0.0579538	-0.0147135	0.155692	0.124968	0.0783438	0.00564056	0.143546	-0.125941	0.104782	-0.0851965	-0.295638	-0.207969	0.172481	0.127333	0.0925413	0.15634	0.0661746	0.320876	0.160948	0.0850645	0.151743	0.0363396
SM.43.4	-0.0717072	-0.0381398	-0.0434683	0.0806001	-0.0753555	-0.070135	-0.030135	-0.119652	0.0407441	0.0765677	-0.0438404	-0.134125	0.0229703	0.0333633	0.00519652	0.0679508	0.0119532	-0.010309	0.0050165	-0.164464	-0.0548575	0.523732	-0.126925	0.411425	-0.163792	0.15826	0.165101	0.350735	0.216922	0.248713	0.591527	0.411557	0.294965	0.122316	-0.334209	0.0468047	0.0148695	-0.199628	-0.0824842	0.232655	-0.218962	0.0951215	0.268623	-0.0269307	0.0462646	-0.168977	-0.127477	-0.108479	-0.126373
SM.43.5	-0.16012	-0.306151	0.184542	0.200192	-0.287165	0.149115	0.172109	0.312427	-0.286301	-0.116568	0.23562	0.121272	0.0243264	0.26273	0.0848965	0.166961	-0.306739	0.0315032	0.289841	0.0625743	0.253669	0.116196	0.539562	0.407633	0.282832	0.216982	0.186919	0.213597	0.23706	0.153483	0.00982898	0.221422	0.0484248	0.0737954	0.13937	0.0541374	0.183318	0.320684	0.161932	-0.167789	0.15754	-0.0148815	-0.297642	0.089553	0.277516	0.291785	0.327537	0.245065	0.359448
SM.44.1	-0.21625	-0.259814	0.0882808	0.128485	-0.25835	0.0564416	0.182178	0.299322	-0.29529	0.029835	0.135926	0.152007	0.0744074	0.282328	0.089997	0.323168	-0.3158	-0.101806	0.349235	0.0936814	0.271815	0.22363	0.442964	0.447285	0.234131	0.410129	0.247153	0.340798	0.291377	0.127849	0.156964	0.374353	0.147831	0.11832	0.153387	0.099838	0.238932	0.434623	0.256874	-0.0726433	0.129577	-0.00830483	-0.182454	0.23742	0.16036	0.146091	0.299742	0.136526	0.303294
SM.44.2	-0.00910891	-0.121164	0.200504	0.208017	-0.139082	0.24078	0.249277	0.338902	-0.0724032	0.0736874	0.372613	0.153303	0.0205941	0.490993	0.226739	0.348095	-0.172037	0.0089889	0.193711	0.049769	0.089649	0.260774	0.253297	0.442832	0.214173	0.351479	0.374665	0.39538	0.262058	0.328197	0.207021	0.478272	0.272031	0.295098	0.148899	0.325917	0.317864	0.230531	0.155704	0.0309271	0.16066	-0.114875	-0.0918452	0.128557	0.344986	0.429919	0.502874	0.46207	0.515308
SM.44.3	-0.0142574	-0.0960816	0.146607	0.238392	-0.107819	0.178986	0.167729	0.332961	-0.10207	0.070051	0.283552	0.149751	0.175002	0.354695	0.222178	0.264194	-0.221998	0.0351515	0.36402	-0.0556256	0.183066	0.324008	0.371665	0.57745	0.240708	0.423354	0.231959	0.415794	0.292409	0.206985	0.209205	0.474827	0.208233	0.154899	0.0126493	0.14249	0.247969	0.262886	0.265887	-0.127561	0.202472	-0.08036	0.0309991	0.252937	0.374017	0.350855	0.450825	0.293081	0.464098
SM.44.4	0.250861	0.261662	0.172949	0.184674	0.260438	0.259166	0.266259	0.163792	0.157804	0.148131	0.227375	0.212001	0.0339754	0.079808	0.485413	0.193507	-0.193291	-0.0775037	0.0818602	-0.00487249	0.132349	0.215698	-0.00638464	0.406397	-0.00174017	0.282376	0.255182	0.345971	0.1973	0.332913	0.353879	0.360492	0.24282	0.157048	-0.101542	0.208005	0.199712	-0.109967	-0.0942454	-0.0535254	0.079928	0.00130813	0.0610021	0.148527	0.226739	0.190207	0.156064	0.0039844	0.141602
SM.44.5	0.0789079	-0.0552175	0.245389	0.279292	-0.0505971	0.254845	0.242532	0.256934	0.0069847	0.220618	0.316388	0.110147	0.110459	0.370945	0.342082	0.387903	-0.100162	-0.117384	0.333357	0.0162976	0.0510411	0.251653	0.131749	0.391731	0.0429403	0.236484	0.27586	0.340186	0.0335434	0.268875	0.309091	0.2827	0.357528	0.196208	0.00606061	0.283744	0.191287	0.0722832	0.00877288	0.0712391	0.150723	0.0242784	0.117408	0.0144014	0.298866	0.312055	0.340726	0.1958	0.356136
SM.44.6	-0.020318	-0.142502	0.16318	0.160492	-0.12456	0.133213	0.205029	0.239976	-0.0449085	0.0789199	0.198692	0.136598	0.00410441	0.245557	0.252121	0.227279	-0.143006	-0.0209661	0.26117	0.0352595	0.0280348	0.174821	0.2039	0.355188	0.030447	0.18405	0.210189	0.364236	0.128509	0.265731	0.339802	0.333885	0.353567	0.22405	-0.104998	0.199316	0.177954	0.0634743	-0.108395	0.0412001	0.133645	0.0828323	-0.0277468	0.0114851	0.197048	0.2433	0.187351	0.0873447	0.227951
SM.44.7	-0.250789	-0.280936	0.0206661	0.0263786	-0.251593	-0.0938974	-0.0124092	0.166397	-0.245401	-0.0365437	0.0448845	-0.0608341	0.0834203	0.0780918	-0.0363036	0.101338	-0.0461566	0.00868887	0.263738	0.129121	0.1188	0.254329	0.241992	0.305803	0.124368	0.257606	0.12402	0.295686	0.273615	0.1194	0.320252	0.23718	0.209913	-0.000588059	-0.182214	-0.104194	-0.0642544	0.0730393	-0.0655146	0.0635224	0.0838404	0.0283468	0.183666	0.0336514	0.182538	-0.0388839	0.0182658	-0.100078	-0.0313711
SM.45.1	0.108503	0.0649385	0.0541974	0.0810441	0.0810801	0.116124	0.155248	0.248317	-0.060198	-0.0777918	0.23808	0.162052	0.123084	0.254797	0.16228	0.206037	-0.209277	0.0452565	0.0871527	0.0793519	0.288353	0.0812721	0.213417	0.227255	0.219982	0.212973	0.0670747	0.0794119	0.156352	-0.0618062	-0.107039	0.119304	0.0192979	0.00822082	0.187519	0.101938	0.223606	0.266019	0.228839	-0.0827723	0.173885	-0.243912	-0.00666067	0.132361	0.267099	0.382442	0.311047	0.365545	0.350183
SM.45.3	-0.254629	-0.214425	-0.131917	-0.0266067	-0.166661	-0.15592	-0.079652	-0.0624182	-0.105239	-0.0333993	-0.0188179	-0.0764596	0.0635344	-0.0275308	-0.0790039	0.02021	-0.179682	-0.0123612	0.049589	-0.0442484	0.191011	0.614761	0.0269787	0.373705	-0.133585	0.0975938	0.0951815	0.345599	0.21727	0.137906	0.585263	0.351539	0.179202	-0.00948095	-0.297498	-0.099586	-0.0476688	0.0020282	-0.162976	0.079748	-0.200972	-0.0781158	0.12054	-0.0447765	0.0143174	-0.231323	-0.115452	-0.132013	-0.0954455
SM.45.9	-0.0650465	0.00655266	-0.0469127	-0.0326913	0.0223822	-0.0794479	0.0249145	-0.151551	0.0751875	0.00290429	-0.0635824	-0.0214461	-0.166409	-0.182706	0.0112451	-0.0386799	0.0450285	-0.0462286	-0.0731833	-0.0661866	-0.141122	0.457498	-0.179934	0.188599	-0.252505	0.0872127	0.212853	0.283408	0.127213	0.321344	0.60174	0.238008	0.266655	0.0507051	-0.341926	0.0705311	-0.0721032	-0.144686	-0.295386	0.204224	-0.2445	0.357972	0.222742	-0.0924332	-0.135902	-0.324932	-0.344446	-0.301134	-0.280492
SM.47.4	0.175866	0.0811761	0.182898	0.21799	0.0930933	0.271395	0.230231	0.393579	0.0613981	0.0192499	0.37961	0.165353	0.0833603	0.404572	0.234107	0.220246	-0.156976	-0.0944254	0.11802	0.189799	0.171581	0.12042	0.311371	0.391887	0.141038	0.282304	0.248281	0.355512	0.218314	0.131893	0.153087	0.327501	0.239088	0.197468	0.03988	0.144182	0.206649	0.180366	0.226247	0.00631263	0.148059	-0.101242	-0.134509	0.0839244	0.183018	0.253645	0.349895	0.279808	0.350291
TG.36.0	-0.0576658	-0.030423	-0.143378	-0.193219	-0.029595	-0.180018	-0.213981	-0.070447	0.0946055	-0.0278428	-0.101878	-0.0512211	0.185323	0.138506	-0.0950735	-0.0580378	0.0009961	-0.0711911	-0.0683948	0.291425	0.0310351	-0.199652	0.0713711	-0.147711	0.0528413	0.0975938	-0.0673867	-0.182094	0.0478728	-0.147951	-0.319016	-0.130213	-0.407957	-0.149103	0.163936	-0.336322	-0.187399	0.117552	0.0483168	0.0686709	0.0509691	-0.225347	-0.172637	-0.0355596	0.193747	0.100006	0.219454	0.278728	0.180618
TG.38.0	-0.141578	-0.0937054	-0.217162	-0.240648	-0.0844404	-0.272583	-0.317264	-0.150339	0.0457846	-0.107027	-0.18357	-0.154683	0.201668	0.0824962	-0.205425	-0.0829643	-0.00794479	-0.070171	-0.0629103	0.265251	0.0352955	-0.138338	0.0408641	-0.133705	0.0338674	0.0661386	-0.0835044	-0.190207	0.0544254	-0.143798	-0.303054	-0.109367	-0.406277	-0.190327	0.147615	-0.376418	-0.241104	0.0354035	0.0167417	0.0818362	0.0167057	-0.172229	-0.161164	-0.0578218	0.223042	0.0593699	0.18045	0.284056	0.145779
TG.39.0	-0.231599	-0.252493	-0.0922052	-0.104662	-0.235992	-0.152151	-0.167417	0.0120732	-0.174233	-0.13961	-0.0532253	-0.129337	0.177402	0.184434	-0.20426	-0.0039484	-0.104866	-0.168665	0.181554	0.206997	0.175842	-0.10327	0.287213	0.00355236	0.157264	0.197948	-0.0842364	-0.165365	0.0488089	-0.0380318	-0.22285	-0.0587819	-0.177378	-0.189271	0.141878	-0.327945	-0.131629	0.203192	0.207537	0.0374197	-0.0508131	-0.141746	-0.13667	-0.0116892	0.199436	0.0389799	0.201836	0.202868	0.226079
TG.40.0	-0.0925533	-0.0439484	-0.191863	-0.207633	-0.0533813	-0.240516	-0.293621	-0.130549	0.0907891	-0.0785119	-0.178806	-0.159208	0.189751	0.0773957	-0.16234	-0.0856046	0.0192499	-0.102322	-0.0782598	0.223066	0.0223102	-0.0941614	0.0156976	-0.133393	0.0479208	0.0639304	-0.0963696	-0.194119	0.0418002	-0.0933093	-0.274959	-0.0872727	-0.3964	-0.167141	0.145443	-0.376502	-0.235272	0.010249	0.0123492	0.0816442	0.0260786	-0.139994	-0.135001	-0.0306511	0.233963	0.0671107	0.189187	0.304026	0.163324
TG.40.1	-0.0535614	0.00678068	-0.149151	-0.210741	0.00255626	-0.182958	-0.216202	-0.113915	0.108575	-0.107255	-0.0847885	-0.0876568	0.154899	0.196868	-0.134029	-0.0163576	-0.0341794	-0.0218902	-0.0734593	0.326757	0.070003	-0.2048	0.0427363	-0.224014	0.0787999	0.0821242	-0.0935254	-0.238152	0.030015	-0.0638584	-0.361452	-0.166445	-0.438824	-0.107051	0.188143	-0.266415	-0.171917	0.0390279	0.0973537	0.0243384	-0.0050285	-0.273615	-0.168581	-0.040096	0.159304	0.0362676	0.154179	0.311983	0.15514
TG.41.0	-0.169121	-0.127345	-0.18147	-0.209901	-0.146043	-0.23514	-0.297654	-0.155032	0.0591659	-0.127357	-0.163612	-0.204236	0.147279	0.136826	-0.214725	-0.0863006	-0.0414041	-0.132913	-0.0354275	0.306007	0.101122	-0.0582538	0.069607	-0.154047	0.135194	0.0621422	-0.0311551	-0.191767	0.0642184	0.0113171	-0.226547	-0.0905371	-0.348911	-0.154911	0.09979	-0.355284	-0.271647	-0.00159616	0.0291509	0.070303	-0.029895	-0.129229	-0.133981	-0.102082	0.248029	0.0165977	0.132757	0.270471	0.127621
TG.42.0	-0.0686589	-0.0144614	-0.177078	-0.220726	-0.0392319	-0.222274	-0.260666	-0.110999	0.0883528	-0.0706991	-0.150987	-0.131413	0.172373	0.124032	-0.131197	-0.0527213	-0.0124572	-0.0621782	-0.0808281	0.282484	0.0686709	-0.113399	0.0269547	-0.169013	0.070255	0.0851245	-0.069799	-0.200012	0.0745755	-0.0375278	-0.288521	-0.0943654	-0.426535	-0.132445	0.154299	-0.374869	-0.209313	-0.00772877	0.04	0.050153	-0.000360036	-0.17541	-0.157072	-0.0412241	0.19874	0.0366037	0.159832	0.289997	0.13847
TG.42.1	-0.0716232	-0.0124932	-0.194239	-0.235392	-0.0333513	-0.242004	-0.279484	-0.145947	0.112847	-0.0868527	-0.170141	-0.135986	0.197048	0.144134	-0.157264	-0.0607021	-0.00777678	-0.0315872	-0.089613	0.283324	0.0276748	-0.150867	-0.00223222	-0.208701	0.0680228	0.0482568	-0.0932373	-0.235164	0.0390759	-0.0671947	-0.329589	-0.121848	-0.450645	-0.115644	0.175926	-0.332745	-0.212889	-0.00261626	0.0538614	0.0837804	0.00318032	-0.205317	-0.171665	-0.0379118	0.187927	0.0470327	0.171413	0.321788	0.155092
TG.42.2	-0.109691	-0.0335674	-0.220174	-0.212361	-0.0318272	-0.255782	-0.283972	-0.171521	0.112811	-0.0575938	-0.134221	-0.130801	0.21745	0.145551	-0.140882	-0.0381038	0.00429643	-0.0520492	-0.0550615	0.245893	0.009973	-0.157552	0.00183618	-0.214053	0.0793639	0.0432163	-0.177618	-0.277936	-0.020162	-0.144662	-0.359172	-0.176382	-0.440672	-0.135158	0.182022	-0.301842	-0.165221	0.039856	0.0787999	0.0916892	0.0337354	-0.262154	-0.158296	-0.00258026	0.204776	0.0470807	0.192091	0.3197	0.184614
TG.42.3	-0.0831083	-0.0454485	-0.146031	-0.120216	-0.0407681	-0.167345	-0.17877	-0.0460846	0.0169817	-0.0257786	-0.00420042	-0.0461566	0.16336	0.205125	-0.0846805	0.0417762	-0.0636064	-0.0211221	0.0366037	0.239628	0.0557936	-0.196424	0.134113	-0.130969	0.172001	0.175806	-0.17529	-0.234623	0.0325953	-0.189235	-0.399856	-0.163984	-0.340846	-0.117264	0.220534	-0.268515	-0.0406001	0.166673	0.207969	-0.0276148	0.0645545	-0.309139	-0.152307	0.0670147	0.209277	0.0781998	0.257834	0.305155	0.242448
TG.43.0	-0.0974377	-0.0917372	-0.127801	-0.17865	-0.11556	-0.159256	-0.23676	-0.0588299	0.0363876	-0.039856	-0.112295	-0.15502	0.13997	0.171689	-0.172889	-0.0433363	0.0155176	-0.111347	-0.00231623	0.300654	0.125773	-0.0721632	0.0917852	-0.131593	0.146031	0.117072	0.00928893	-0.139694	0.110027	0.0471047	-0.219994	-0.0315272	-0.308467	-0.0828443	0.165004	-0.322088	-0.197636	0.04036	0.107447	0.0408881	0.0213381	-0.178842	-0.145611	-0.0552295	0.207021	0.0883288	0.192283	0.291137	0.16384
TG.43.1	-0.0746355	-0.0446325	-0.0983858	-0.160576	-0.0481848	-0.128713	-0.158632	-0.0482808	0.0572817	-0.116868	0.0127573	-0.0726913	0.12336	0.285509	-0.137846	0.0143054	-0.0290669	0.0333753	-0.0477048	0.360768	0.140114	-0.154263	0.108155	-0.165353	0.193411	0.119472	-0.0363156	-0.207501	0.105299	-0.0350075	-0.342874	-0.114527	-0.322268	-0.0593579	0.202928	-0.243672	-0.183282	0.0718752	0.152667	-0.0544614	-0.00724873	-0.255902	-0.228323	-0.0378158	0.216286	0.0820042	0.204308	0.397912	0.233015
TG.44.0	-0.0269667	0.00343234	-0.123864	-0.211149	-0.0132613	-0.173525	-0.187315	-0.0556016	0.0849685	-0.0540414	-0.0929253	-0.0853525	0.126361	0.146415	-0.0990459	-0.0365197	-0.0543894	-0.0341554	-0.0734593	0.379838	0.111671	-0.192283	0.0549655	-0.172241	0.0780438	0.115056	0.0217702	-0.160828	0.121668	0.00451245	-0.277936	-0.069631	-0.430927	-0.0772997	0.148995	-0.33577	-0.193423	-0.00554455	0.0286709	0.00908491	-0.0451125	-0.200408	-0.158896	-0.0491809	0.13829	0.0419562	0.139082	0.270303	0.128221
TG.44.1	-0.0372757	-0.00283228	-0.128113	-0.192331	-0.0182778	-0.167213	-0.198788	-0.0555536	0.05997	-0.0625863	-0.0821602	-0.0745034	0.176706	0.201536	-0.121236	-0.0114491	-0.0423522	0.0168017	-0.0353435	0.330849	0.111599	-0.158764	0.0691029	-0.18063	0.126529	0.125221	-0.0440084	-0.20012	0.104866	-0.0378758	-0.353291	-0.0874047	-0.429595	-0.0709631	0.22423	-0.312715	-0.153783	0.0563816	0.128509	-0.00524452	-0.0123612	-0.245461	-0.1988	0.00511251	0.163012	0.0626103	0.191311	0.341158	0.189979
TG.44.2	-0.123372	-0.0564656	-0.217354	-0.207297	-0.070423	-0.254485	-0.275308	-0.143582	0.0841404	-0.0922652	-0.126637	-0.158068	0.192331	0.17613	-0.165113	-0.0180258	-0.0276508	-0.0443924	-0.0359316	0.278104	0.0484608	-0.10279	0.0120732	-0.20084	0.10009	0.0713231	-0.115932	-0.24246	0.0383678	-0.0457486	-0.321248	-0.130009	-0.391551	-0.0891089	0.173741	-0.308575	-0.155152	0.0188299	0.111587	0.0812601	-0.0447645	-0.244596	-0.176478	-0.01955	0.19916	0.0170777	0.165317	0.327225	0.175074
TG.44.3	-0.160444	-0.0789919	-0.221878	-0.185599	-0.0811761	-0.239424	-0.26477	-0.148227	0.0836484	-0.0863126	-0.0972217	-0.129301	0.210657	0.193039	-0.14249	0.0190819	-0.00370837	-0.0616502	0.0080048	0.234419	0.0253825	-0.115764	0.0251785	-0.193639	0.103102	0.0757396	-0.165881	-0.272043	0.00152415	-0.0926973	-0.337966	-0.16096	-0.371737	-0.0914971	0.184494	-0.270819	-0.120108	0.0717672	0.141878	0.089997	-0.0114011	-0.270027	-0.161248	0.0208221	0.219862	0.0321032	0.186955	0.324848	0.208665
TG.45.0	-0.0551455	-0.0483648	-0.09985	-0.190231	-0.0573777	-0.141146	-0.184218	-0.0410921	0.0330153	-0.105143	-0.0486529	-0.10015	0.1573	0.184278	-0.149043	-0.0363396	-0.0437804	-0.0172817	-0.0250585	0.349655	0.151695	-0.0789919	0.0975818	-0.129433	0.132373	0.144374	0.0561296	-0.107207	0.18189	0.0855206	-0.186415	0.00432043	-0.292829	-0.0337594	0.100174	-0.292733	-0.212361	0.0123852	0.0793039	0.00231623	-0.0742034	-0.18195	-0.152811	-0.0632703	0.153039	0.0644344	0.124704	0.273291	0.127765
TG.45.1	-0.0461686	-0.0216622	-0.143894	-0.213105	-0.0522532	-0.170321	-0.217438	-0.0573057	0.0276388	-0.0821362	-0.0778998	-0.10057	0.140318	0.174353	-0.156868	-0.0292109	-0.00781278	-0.0193699	-0.0590939	0.347567	0.143642	-0.126877	0.0420762	-0.182898	0.125497	0.10015	-0.0222742	-0.189931	0.126445	0.00847285	-0.292421	-0.0710951	-0.374737	-0.0769037	0.155644	-0.319952	-0.193663	0.0216382	0.107639	-0.0291989	-0.0274467	-0.201728	-0.174533	-0.0433843	0.153915	0.0467087	0.145815	0.290933	0.131737
TG.45.2	-0.0610981	-0.0166937	-0.133621	-0.188323	-0.0444164	-0.157	-0.213345	-0.125665	0.106235	-0.0470327	-0.0763036	-0.103906	0.151251	0.264062	-0.134641	-0.039508	-0.0267747	0.0261266	-0.0684428	0.339262	0.123036	-0.18321	0.0431563	-0.253141	0.18441	0.059622	-0.0751155	-0.268683	0.0693429	-0.0768797	-0.415674	-0.157108	-0.383678	-0.0968737	0.268407	-0.282712	-0.198164	0.0572817	0.114899	0.00670867	0.00243624	-0.254497	-0.231371	-0.03994	0.197024	0.070147	0.178626	0.349643	0.168089
TG.46.0	0.0728713	0.0944014	-0.0710111	-0.176406	0.0510771	-0.0841164	-0.115632	-0.00445245	0.10237	-0.010153	-0.0266307	0.00682868	0.0732553	0.173297	-0.0383318	0.0110411	-0.0635944	0.0664266	-0.123468	0.403624	0.137066	-0.334161	0.0751755	-0.248485	0.201728	0.126061	-0.0020282	-0.248065	0.0945215	-0.0786919	-0.46027	-0.163912	-0.452601	-0.0508971	0.303066	-0.306967	-0.120216	0.0430603	0.0955056	-0.0951335	0.079928	-0.226295	-0.207081	0.0577018	0.155764	0.166397	0.202652	0.344038	0.197144
TG.46.1	0.0425803	0.0753435	-0.10153	-0.216526	0.040096	-0.151059	-0.152283	-0.079724	0.120336	-0.040372	-0.08018	-0.0752595	0.105719	0.17883	-0.0813921	-0.0550135	-0.0447285	0.0529253	-0.136766	0.449325	0.118044	-0.257498	0.00556856	-0.264734	0.0968017	0.0528293	0.0364476	-0.210861	0.0971617	0.0156736	-0.340666	-0.126817	-0.472703	-0.0192739	0.174761	-0.253429	-0.178938	-0.0589739	0.0178818	0.0183978	-0.050105	-0.227519	-0.209301	-0.0562016	0.0950255	0.0219382	0.104218	0.291761	0.0941614
TG.46.2	-0.0552655	-0.00711671	-0.172061	-0.193339	-0.0359436	-0.211365	-0.199172	-0.100378	0.0956976	-0.0623702	-0.0945215	-0.116904	0.178206	0.189187	-0.0989139	-0.0247345	-0.0359916	0.0228863	-0.0389439	0.368389	0.0839604	-0.160696	0.00604861	-0.241656	0.13889	0.0681788	-0.0528773	-0.232211	0.0707831	-0.01973	-0.342478	-0.139238	-0.422178	-0.0348995	0.202268	-0.279988	-0.130621	-0.00877288	0.0826763	0.0650585	-0.0682988	-0.232295	-0.208281	-0.00931293	0.135038	-0.0159136	0.138566	0.312859	0.148815
TG.46.3	-0.145707	-0.0675668	-0.219682	-0.196688	-0.0834803	-0.238956	-0.246541	-0.120648	0.0567537	-0.0875128	-0.0956856	-0.136538	0.187495	0.203816	-0.147747	-0.00732073	-0.0357636	-0.00964897	0.000732073	0.280072	0.0758956	-0.118224	0.0152415	-0.218254	0.177126	0.0789439	-0.136094	-0.264098	0.0426883	-0.090453	-0.370561	-0.148707	-0.373453	-0.0944254	0.229175	-0.292673	-0.12144	0.0611821	0.162736	0.0624782	-0.0567777	-0.270759	-0.183006	0.0314431	0.188383	0.000852085	0.178974	0.334317	0.193243
TG.46.4	-0.193723	-0.099526	-0.242628	-0.165593	-0.0959376	-0.251353	-0.272151	-0.140258	0.0529733	-0.105503	-0.0965977	-0.120228	0.212769	0.187639	-0.160228	0.0275188	-0.0184098	-0.0634623	0.0537294	0.214761	0.0493489	-0.0615182	0.0314911	-0.169277	0.169493	0.0875848	-0.172565	-0.248929	0.0517972	-0.112187	-0.326049	-0.137822	-0.327393	-0.0823042	0.165341	-0.231107	-0.0906091	0.0888089	0.188923	0.0847885	-0.0212661	-0.2421	-0.192991	0.0780198	0.220762	0.0207981	0.207957	0.35622	0.225539
TG.47.0	0.0680468	0.0711791	-0.0450525	-0.146655	0.0280348	-0.0466967	-0.125545	0.0371557	0.0889409	-0.0366757	-0.0313711	0.0162136	0.118968	0.218398	-0.0775878	0.0307711	-0.0530573	0.0116052	-0.0778518	0.350327	0.144278	-0.271587	0.105635	-0.24366	0.245737	0.10243	-0.0205941	-0.235836	0.0991059	-0.069727	-0.442232	-0.134389	-0.391503	-0.0456046	0.299562	-0.305203	-0.149175	0.0739394	0.15886	-0.158692	0.136322	-0.216238	-0.215374	0.0807081	0.175938	0.220702	0.253729	0.394275	0.23994
TG.47.1	-0.0128173	0.0209301	-0.138626	-0.251581	-0.0080528	-0.176946	-0.197804	-0.127789	0.0906211	-0.10333	-0.0749235	-0.106775	0.0474047	0.164464	-0.172517	-0.0542814	-0.0250825	0.0344194	-0.154227	0.402664	0.155056	-0.184158	-0.0331833	-0.262634	0.0731473	0.0486769	0.0713591	-0.169589	0.146151	0.0849325	-0.270771	-0.0613981	-0.382142	-0.0163696	0.127897	-0.257954	-0.219874	-0.0631263	0.0353795	0.00706871	-0.103354	-0.223126	-0.195788	-0.080168	0.0562376	-0.0069967	0.0224302	0.267519	0.0325833
TG.47.2	-0.0885329	-0.0287669	-0.177522	-0.259718	-0.079616	-0.207309	-0.224698	-0.121608	0.0606781	-0.133453	-0.105407	-0.153519	0.147903	0.193459	-0.199376	-0.0393519	-0.079892	-0.0394239	-0.0842244	0.354395	0.152943	-0.153639	0.0039844	-0.250825	0.171641	0.0634143	0.00280828	-0.213201	0.0985059	0.0391719	-0.304482	-0.102094	-0.338782	-0.0260546	0.182874	-0.28018	-0.245581	-0.00686469	0.107375	0.00588059	-0.0930933	-0.166841	-0.179562	-0.0544374	0.105311	-0.00322832	0.0824482	0.289973	0.0815482
TG.48.0	0.207057	0.185863	0.0473087	-0.0618422	0.152775	0.0455206	0.00379238	0.103654	0.0810321	0.0275788	0.0789319	0.116664	0.0543294	0.196436	0.0639304	0.0441044	-0.115416	0.113183	-0.0685029	0.358788	0.165233	-0.447489	0.149679	-0.228143	0.22405	0.158776	-0.00830483	-0.257162	0.0606181	-0.0939094	-0.579598	-0.197156	-0.382322	0.02039	0.387315	-0.186199	0.0150135	0.0916292	0.167573	-0.191455	0.188575	-0.265875	-0.205485	0.10159	0.188995	0.293753	0.278728	0.376526	0.276976
TG.48.1	0.134917	0.113495	0.00255626	-0.125449	0.0825083	-0.0189139	-0.0257306	0.0673867	0.0413441	-0.000240024	0.0455686	0.049637	0.0314071	0.199436	-0.0312511	0.0530213	-0.106739	0.0984338	-0.0654665	0.465659	0.224998	-0.36288	0.150507	-0.173849	0.183882	0.178614	0.109955	-0.165365	0.159124	0.0127333	-0.42213	-0.0806121	-0.395044	0.0284428	0.246853	-0.206829	-0.0719832	0.0527093	0.133957	-0.126865	0.0645425	-0.232895	-0.252181	0.0494569	0.0990339	0.160432	0.17757	0.291173	0.176142
TG.48.2	0.0630183	0.0834443	-0.0763756	-0.185371	0.03988	-0.108359	-0.0969097	-0.0424722	0.108947	-0.0580378	-0.0184938	-0.029883	0.0766517	0.207345	-0.0547015	0.00532853	-0.0812721	0.0939094	-0.103174	0.453909	0.161788	-0.311395	0.04042	-0.267531	0.16132	0.0855566	0.0928893	-0.221866	0.10483	0.0370117	-0.409601	-0.128965	-0.434995	0.0207381	0.241344	-0.205245	-0.123984	-0.0182178	0.0817162	0.00331233	-0.0406121	-0.230135	-0.235824	-0.00964897	0.089889	0.0649025	0.122208	0.318632	0.136046
TG.48.3	-0.0265587	-0.00494449	-0.114419	-0.140798	-0.00838884	-0.134269	-0.111791	0.0315032	-0.0281788	-0.0458566	0.00351635	-0.0490129	0.143618	0.193639	-0.0617582	0.0430243	-0.164848	0.0582298	0.0675068	0.364128	0.180234	-0.213153	0.187867	-0.1203	0.279784	0.205845	-0.0389799	-0.187759	0.143942	-0.0889649	-0.431803	-0.0694029	-0.376682	-0.0471407	0.293129	-0.242544	0.00680468	0.155032	0.234431	-0.0777918	0.0380198	-0.273999	-0.229175	0.127393	0.142598	0.059994	0.24408	0.326565	0.258998
TG.48.4	-0.162412	-0.0588419	-0.258698	-0.154851	-0.0794479	-0.27712	-0.248929	-0.111383	0.0529373	-0.0481728	-0.122508	-0.1597	0.181026	0.106919	-0.0836604	-0.0263186	-0.0656346	0.00106811	0.0417162	0.225059	0.0393039	-0.0313231	0.0158776	-0.151779	0.184434	0.10345	-0.127729	-0.187711	0.099538	-0.108515	-0.29721	-0.0854725	-0.333261	-0.101326	0.168677	-0.239148	0.0245785	0.0286949	0.120408	0.104122	-0.0442364	-0.234443	-0.157828	0.108935	0.180474	-0.0647105	0.164296	0.27748	0.182406
TG.48.5	-0.1615	-0.0628023	-0.232223	-0.105251	-0.0530093	-0.234155	-0.22021	-0.0887009	0.0511851	-0.0430723	-0.0666067	-0.140498	0.198872	0.168425	-0.0841044	0.0325593	-0.0790039	-0.00321632	0.0854725	0.209553	0.0421722	-0.0375758	0.049853	-0.0766637	0.179922	0.15532	-0.149967	-0.122172	0.145635	-0.119844	-0.279268	-0.0224182	-0.288089	-0.0479568	0.162724	-0.167381	0.0618902	0.0648905	0.136886	0.0749715	-0.0480888	-0.249661	-0.138362	0.142838	0.21529	-0.0311791	0.189799	0.308887	0.216406
TG.48.6	-0.039796	-0.0272667	-0.0449565	0.039772	0.0137534	-0.0205461	-0.00873687	0.151431	-0.0185299	-0.00543654	0.190735	0.0875368	0.198896	0.304926	0.0481608	0.228131	-0.125389	0.0639424	0.168293	0.250501	0.233807	-0.0273867	0.244668	0.104542	0.275284	0.34339	-0.0354875	0.0542214	0.31748	-0.0607261	-0.216934	0.181662	-0.149691	0.00190819	0.267363	-0.0788839	0.190147	0.204692	0.249901	-0.0169337	0.0210141	-0.342562	-0.126061	0.273291	0.281788	0.158632	0.319292	0.379766	0.383078
TG.49.0	0.189139	0.200348	-0.00788479	-0.104278	0.135638	0.00918092	-0.0740834	0.060258	0.119544	-0.010417	0.0245065	0.0392919	0.103822	0.189031	-0.00979298	0.0409121	-0.020078	0.0637384	-0.171149	0.310327	0.122712	-0.345299	0.0766037	-0.244692	0.239712	0.117276	-0.0108131	-0.275968	0.0678428	-0.127489	-0.546331	-0.186043	-0.342178	-0.040336	0.308923	-0.2391	-0.0918452	0.0481248	0.168917	-0.181662	0.187279	-0.249217	-0.189643	0.105695	0.200192	0.29547	0.296274	0.428803	0.270327
TG.49.1	0.0582178	0.049577	-0.079736	-0.201392	-0.0080168	-0.108395	-0.150303	-0.0662106	0.110603	-0.0583618	-0.0446805	-0.0465647	0.069787	0.207057	-0.129553	-0.00482448	-0.0224902	0.0320192	-0.145383	0.383702	0.117936	-0.253957	-0.00258026	-0.24474	0.128941	0.04042	0.110891	-0.181014	0.141062	0.0836364	-0.313003	-0.0768557	-0.345203	0.0520492	0.152391	-0.218098	-0.199412	-0.0658386	0.0860126	-0.00140414	0.00770477	-0.147831	-0.237636	-0.0245545	0.0548575	0.123384	0.116868	0.334485	0.105959
TG.49.2	0.0125053	0.0222142	-0.0530693	-0.0439844	0.00490849	-0.0264266	-0.0733873	0.111863	-0.0460966	-0.00325232	0.0987579	0.0258866	0.17775	0.22159	-0.0124092	0.0980018	-0.153891	-0.0434563	0.104662	0.25763	0.214377	-0.205617	0.185671	-0.00456046	0.233279	0.291617	-0.040324	-0.0882928	0.142046	-0.0812961	-0.366733	-0.0108491	-0.251497	-0.0883048	0.28384	-0.267675	-0.0210741	0.207921	0.274047	-0.05997	0.0323432	-0.232727	-0.099958	0.193831	0.295866	0.174821	0.342178	0.345767	0.359676
TG.49.3	-0.374329	-0.232439	-0.353639	-0.283828	-0.202256	-0.42495	-0.321668	-0.302322	-0.115068	-0.226079	-0.255506	-0.332373	0.101914	-0.158128	-0.277348	-0.0450165	-0.123576	-0.152787	-0.0358236	-0.00476448	0.0522172	0.505599	-0.156184	0.101434	-0.161656	0.108827	-0.0161536	0.123972	0.268971	0.168197	0.443732	0.284716	0.0733993	-0.1642	-0.351707	-0.314851	-0.229235	-0.140366	-0.0877168	0.0980138	-0.463534	-0.049733	0.242244	-0.0850165	-0.0910771	-0.504686	-0.34387	-0.198068	-0.257702
TG.50.0	0.243144	0.206709	0.105731	-0.0050165	0.162292	0.122628	0.0446205	0.153675	0.0813801	0.0520132	0.0807681	0.139286	0.019922	0.209157	0.117108	0.00970897	-0.134917	0.127705	-0.0737474	0.289769	0.182538	-0.470423	0.224038	-0.233951	0.353831	0.132709	-0.0179178	-0.273387	0.0040444	-0.122976	-0.650525	-0.226799	-0.338326	0.0548335	0.465767	-0.100138	0.0735194	0.114083	0.19814	-0.211917	0.330537	-0.250369	-0.28114	0.142454	0.228515	0.385875	0.345083	0.435584	0.327969
TG.50.1	0.303018	0.191695	0.193927	0.0666427	0.149007	0.192007	0.141998	0.21847	0.0354515	0.108395	0.157984	0.206625	-0.0153855	0.251353	0.155488	0.0890609	-0.10447	0.0847885	-0.00679268	0.373585	0.194671	-0.478668	0.248161	-0.107243	0.225443	0.197048	0.138842	-0.150483	0.0952295	-0.0331593	-0.515032	-0.129349	-0.263774	0.138674	0.353495	-0.08024	0.0736154	0.133957	0.199496	-0.166001	0.285149	-0.195788	-0.242208	0.111971	0.231611	0.418974	0.365677	0.400192	0.330789
TG.50.2	0.277936	0.176322	0.158956	0.0351875	0.146127	0.168329	0.137078	0.22051	0.0111611	0.0770957	0.181098	0.207693	0.020378	0.271935	0.129061	0.114287	-0.147735	0.125317	0.0327753	0.43952	0.302178	-0.466007	0.304746	-0.089913	0.282628	0.256154	0.174545	-0.139358	0.124032	-0.00625263	-0.530429	-0.0854005	-0.301458	0.0950735	0.365593	-0.0775278	0.0714791	0.175842	0.215614	-0.159736	0.250009	-0.210849	-0.250285	0.135902	0.223954	0.366157	0.330393	0.363264	0.31616
TG.50.3	0.179946	0.173165	0.0309271	-0.0875728	0.0945815	0.0357036	0.0490849	0.0428443	0.131413	-0.0211341	0.0929373	0.0711431	0.0282148	0.276772	0.0449805	0.0544975	-0.135998	0.156916	-0.060342	0.436916	0.226571	-0.429295	0.0844644	-0.293261	0.254845	0.0323792	0.148851	-0.269307	0.0273867	0.0255025	-0.531281	-0.184638	-0.369853	0.0916172	0.332373	-0.0370477	-0.009985	0.0363876	0.111575	0.0150135	0.0720672	-0.209385	-0.303162	0.0583978	0.103582	0.171113	0.193591	0.348395	0.212133
TG.50.4	-0.0118572	0.0190699	-0.0443564	-0.00984098	-0.0360996	-0.0589019	0.00626463	0.0150255	0.0247225	-0.0882208	0.0747675	0.0408281	0.0611701	0.249445	0.0282868	0.0684668	-0.172649	0.149499	0.0715152	0.249037	0.147939	-0.171281	0.0887369	-0.155368	0.32162	0.131437	0.0357636	-0.229919	0.0437804	-0.0457126	-0.424206	-0.131701	-0.248677	0.0240024	0.291905	-0.0394719	0.109115	0.114347	0.218266	0.0565737	0.0029523	-0.191503	-0.257234	0.197732	0.113003	0.0417522	0.199616	0.365245	0.248149
TG.50.5	-0.0946055	-0.0407201	-0.0951215	0.00692469	-0.0369877	-0.0727753	-0.0291269	0.152367	-0.138806	-0.0547855	0.111911	0.0775398	0.0958896	0.1609	0.00721272	0.119976	-0.17811	0.0976418	0.180702	0.133801	0.168641	-0.0215422	0.247837	0.0548695	0.38441	0.320984	-0.0528893	-0.0384278	0.275848	-0.132061	-0.303486	0.0807801	-0.0988419	-0.0984458	0.240864	-0.136046	0.2036	0.246397	0.365149	-0.0628863	0.0737114	-0.269043	-0.160108	0.312931	0.144086	0.0518092	0.260918	0.270651	0.292937
TG.50.6	-0.110303	-0.029847	-0.127201	-0.0689709	-0.0434923	-0.131557	-0.0782838	0.0726673	0.00342034	-0.0210981	0.0718152	-0.00687669	0.0834083	0.249721	-0.0261746	0.0670267	-0.0827363	0.108335	0.0828803	0.303078	0.128653	-0.0863966	0.103306	-0.0811281	0.273675	0.232727	0.0173177	0.0270387	0.31574	-0.0174857	-0.225563	0.108695	-0.168689	-0.0515692	0.193867	-0.112823	0.112595	0.100486	0.176838	0.0970897	-0.0329073	-0.320372	-0.218506	0.225587	0.159496	0.0121932	0.188707	0.344014	0.254377
TG.51.1	0.122016	0.110363	-0.0542574	-0.190351	0.0352475	-0.0447645	-0.129673	-0.0780558	0.137846	-0.0262346	-0.0417762	-0.0250585	0.0762916	0.171497	-0.0758476	-0.0253345	-0.019826	0.0428443	-0.164428	0.311827	0.141638	-0.316208	-0.00358836	-0.343078	0.185539	-0.0685389	0.0430243	-0.349043	-0.0249985	-0.0421962	-0.512979	-0.229631	-0.353291	0.0250945	0.253633	-0.195752	-0.207021	-0.0268827	0.107255	-0.0330993	0.171233	-0.116508	-0.281884	-0.0270987	0.141494	0.257714	0.195728	0.399172	0.158752
TG.51.2	-0.114695	-0.0506451	-0.182526	-0.179682	-0.0712751	-0.209121	-0.20174	-0.0621782	0.0213741	-0.080504	-0.0939574	-0.0772757	0.174197	0.132133	-0.129049	-0.030363	-0.0575578	-0.0208341	0.0486169	0.248893	0.118572	-0.180702	0.0555536	-0.241092	0.169037	0.0920252	-0.147087	-0.240288	0.0569217	-0.0929853	-0.368245	-0.161212	-0.311827	-0.106175	0.191695	-0.374617	-0.150063	0.0473687	0.189847	-0.0417522	-0.0849805	-0.229883	-0.131509	-0.00615662	0.101314	-0.0594779	0.0730753	0.186607	0.0978458
TG.51.3	-0.143162	-0.170537	-0.000492049	0.0449685	-0.162976	-0.0334473	-0.00915692	0.164932	-0.148119	0.00732073	0.0776838	0.0489409	0.116892	0.210117	-0.040264	0.146691	-0.191575	0.0255025	0.221518	0.277192	0.0932613	-0.0965977	0.307747	0.0379358	0.327897	0.241956	-0.0121212	-0.0911851	0.171797	-0.114359	-0.350819	-0.0480888	-0.207813	-0.0618902	0.389139	-0.20024	0.0888209	0.34201	0.324572	-0.185695	0.0655746	-0.195644	-0.201668	0.163276	0.180882	0.148167	0.391347	0.390939	0.464866
TG.51.4	0.049937	0.000732073	0.106187	0.175434	0.0210621	0.146607	0.113231	0.265383	-0.123456	-0.0372157	0.201236	0.131269	0.148155	0.247837	0.0337474	0.246757	-0.317936	0.116688	0.194155	0.0268107	0.232139	-0.0578698	0.295998	0.216814	0.405941	0.353159	-0.0260306	0.0989499	0.21943	-0.137138	-0.325917	0.205197	0.0135974	0.0489529	0.381578	-0.0191659	0.26297	0.284464	0.368173	-0.225047	0.252601	-0.216082	-0.155632	0.334833	0.214929	0.222394	0.350579	0.392031	0.397276
TG.51.5	-0.0717792	-0.103738	0.060378	0.160204	-0.0822202	0.0775037	0.115104	0.246457	-0.170177	0.0638944	0.1633	0.161848	-0.0224662	0.154635	0.0865647	0.292877	-0.0594419	0.126277	0.168065	0.049649	0.113135	0.165929	0.206841	0.29913	0.317384	0.271251	0.105179	0.164128	0.230171	-0.080396	-0.0187699	0.230531	0.143918	-0.0114731	0.247069	0.0652865	0.285449	0.28126	0.38051	-0.141386	0.158656	-0.141086	-0.22231	0.334401	0.177174	0.173861	0.275956	0.263918	0.328245
TG.51.6	-0.0570777	-0.0120852	-0.00222022	0.0692709	-0.0139454	0.0141734	0.0814281	0.108467	-0.179454	-0.00706871	0.151011	0.119772	0.00166817	0.0959976	0.0210381	0.181854	-0.0911731	0.0135734	0.10381	0.0479928	-0.0641464	-0.000924092	0.195116	0.2003	0.0911371	0.312763	0.178038	0.185683	0.298254	0.0809841	0.0581698	0.294161	0.14009	-0.0545935	0.0477888	0.14177	0.217174	0.0417762	0.0673987	-0.0243024	0.0790039	-0.0468647	0.0487969	0.0480648	0.136826	0.0225503	0.0413321	0.0277348	0.0947375
TG.52.1	0.190855	0.185503	0.0687069	-0.0875008	0.126097	0.0576778	-0.0381038	-0.0354395	0.18189	-0.0388239	-0.0144614	0.0644104	0.138206	0.18123	0.069607	-0.0209901	-0.0669547	0.00745275	-0.130045	0.20216	0.0351275	-0.467363	0.0482088	-0.410477	0.193711	-0.140774	-0.1588	-0.487717	-0.192355	-0.186151	-0.681584	-0.445161	-0.297966	0.0441524	0.312283	-0.10411	-0.134965	0.0452565	0.0933213	-0.0912211	0.274911	-0.0740354	-0.255602	-0.0606901	0.189271	0.334137	0.282292	0.387627	0.216226
TG.52.2	0.323048	0.189499	0.328593	0.215878	0.166121	0.386067	0.292613	0.345551	-0.0285749	0.156544	0.272019	0.29793	0.0820882	0.313243	0.235104	0.0787039	-0.127081	0.126973	0.156544	0.0688509	0.185131	-0.509487	0.395524	-0.089697	0.364176	0.0141854	-0.0930093	-0.262346	-0.168569	-0.249433	-0.711815	-0.248125	-0.143702	0.122016	0.506691	0.196328	0.233855	0.32318	0.334389	-0.297522	0.500414	-0.130429	-0.358176	0.195968	0.172925	0.524428	0.505371	0.338242	0.454713
TG.52.3	0.208569	0.0657546	0.351059	0.386463	0.0694629	0.430855	0.385131	0.423822	-0.120372	0.137702	0.330393	0.267339	0.0279508	0.265047	0.26267	0.167849	-0.169085	0.123804	0.30123	-0.145431	0.130789	-0.232175	0.427063	0.256382	0.340414	0.166541	-0.0130693	-0.00622862	-0.133549	-0.195632	-0.430219	-0.0255025	0.0782958	0.127861	0.391683	0.268215	0.374965	0.374041	0.383162	-0.24444	0.464458	-0.0481488	-0.290921	0.276796	0.229223	0.435368	0.485233	0.276544	0.482172
TG.52.4	0.113495	0.0627903	0.185851	0.286877	0.0145935	0.247861	0.244212	0.151227	0.0414641	0.140114	0.188203	0.13667	-0.0039724	0.18159	0.222358	0.137738	-0.147747	0.0709271	0.181926	-0.191119	-0.0293069	-0.0308911	0.0986139	0.139214	0.236136	0.030123	0.0443564	-0.0470687	-0.189247	-0.0480528	-0.229139	-0.0533693	0.109751	0.181962	0.249949	0.269535	0.306559	0.134833	0.183018	0.0944494	0.268971	0.0558896	-0.187675	0.159592	0.162856	0.186955	0.294869	0.274479	0.289289
TG.52.5	0.0114731	0.0276748	0.0441164	0.170585	-0.0154095	0.0983018	0.139322	0.0951455	0.0130093	0.0729913	0.156412	0.128881	-0.0176298	0.17583	0.149583	0.122616	-0.150723	0.124896	0.181674	-0.0545335	0.029547	-0.0231863	0.10195	0.0709391	0.319496	0.0866727	0.0455206	-0.0447885	0.00453645	-0.0679268	-0.224962	-0.00414041	0.0342514	0.0625022	0.210189	0.143762	0.252721	0.154035	0.192475	0.117732	0.172745	0.00806481	-0.193723	0.25589	0.14405	0.0971977	0.252925	0.279172	0.272691
TG.52.6	-0.0381518	0.0160456	-0.0236904	0.0759916	-0.0241464	0.0070087	0.108419	0.119124	-0.0392079	-0.0321272	0.146655	0.165293	-0.0309511	0.18015	0.0814161	0.154407	-0.155764	0.185119	0.174869	0.13541	0.144722	-0.0369157	0.120744	0.030027	0.318152	0.168353	0.0966577	0.0534173	0.248869	-0.00440444	-0.150939	0.112991	-0.0227303	0.0150735	0.153291	0.0625143	0.224854	0.147819	0.212961	0.0736754	0.0564056	-0.109643	-0.211725	0.317288	0.0570897	-0.00584458	0.141962	0.251977	0.212925
TG.52.7	-0.020438	0.0441404	-0.00594059	0.00508851	0.0114251	-0.0122292	0.070351	0.169445	-0.0292949	-0.0456046	0.156736	0.124248	-0.0368317	0.226343	0.0286829	0.132469	-0.149667	0.205413	0.109967	0.303522	0.212193	-0.0571257	0.151371	0.030027	0.300798	0.250561	0.183642	0.192679	0.465959	0.0742394	-0.10363	0.259382	-0.0572337	0.0448365	0.138974	0.0180258	0.186475	0.135674	0.178914	0.0894569	0.00763276	-0.197528	-0.201236	0.317768	0.0917492	0.0159376	0.153867	0.323924	0.234347
TG.53.0	0.202184	0.164608	0.147747	0.149247	0.168281	0.155488	0.106559	0.178614	0.0844044	0.0492049	0.151659	0.221482	0.193195	0.210057	0.125737	0.148659	-0.0851125	-0.0707111	0.176898	-0.0290309	0.00914491	-0.349451	0.156688	-0.178926	0.225803	0.0605101	-0.264806	-0.244776	-0.090117	-0.189127	-0.524968	-0.189643	-0.0659946	0.170225	0.287033	0.1176	0.304014	0.128881	0.359352	-0.154563	0.226043	-0.223474	-0.0593579	0.253789	0.13529	0.286421	0.254461	0.282148	0.309607
TG.53.1	0.142178	0.106235	0.0767117	-0.0455566	0.0624902	0.0890129	-0.0375638	0.0383078	0.123492	-0.0254425	0.0481008	0.0342994	0.210981	0.25955	0.0121812	0.0166697	-0.115296	-0.00277228	-0.0758236	0.199052	0.158584	-0.288665	0.144206	-0.282796	0.302754	-0.0514131	-0.0872607	-0.353843	-0.10183	-0.15766	-0.599892	-0.310063	-0.195596	-0.0743594	0.376634	-0.139874	-0.18057	0.0766637	0.167681	-0.147495	0.283972	-0.0878848	-0.249817	0.0841164	0.250825	0.365389	0.34423	0.418794	0.281068
TG.53.2	0.118488	0.0793519	0.0544494	-0.039964	0.0373717	0.103186	-0.000744074	-0.0194419	0.124488	0.00336034	0.0515572	0.0127573	0.189919	0.296454	-0.00656466	0.0151335	-0.0468287	0.059634	0.00973297	0.0708671	0.0824122	-0.288269	0.0946775	-0.3194	0.28144	-0.191011	-0.0888569	-0.427423	-0.246445	-0.14087	-0.618698	-0.30099	-0.195452	0.0939214	0.375494	0.0929493	-0.08012	0.10087	0.272079	-0.109511	0.231623	-0.0644464	-0.321536	0.0153615	0.107819	0.321896	0.313939	0.410945	0.293921
TG.53.3	0.14393	0.0858326	0.103102	0.0389919	0.0672667	0.104758	0.0592499	0.247729	-0.0485089	-0.0142694	0.119808	0.198764	0.0616382	0.186259	0.0691989	0.0769037	-0.179766	0.163432	0.030423	0.305791	0.234863	-0.403024	0.27742	-0.0890369	0.368965	0.23682	-0.0284548	-0.110975	0.125017	-0.118812	-0.471791	-0.0637384	-0.192895	-0.111515	0.433123	-0.21541	0.0741314	0.153279	0.226403	-0.237576	0.19964	-0.304002	-0.13631	0.217234	0.220222	0.230915	0.291893	0.263534	0.299634
TG.53.4	-0.243984	-0.0928533	-0.175746	-0.0421482	-0.0560336	-0.208185	-0.162544	-0.296754	0.0382718	-0.201368	-0.0910171	-0.21751	0.153651	-0.0159976	0.00706871	-0.0183498	-0.175782	-0.202904	0.07964	-0.182706	-0.111899	0.403684	-0.184782	0.0957456	-0.14219	0.0959256	-0.184578	0.0440204	0.0720672	0.0732553	0.322124	0.109691	0.105119	-0.0418122	-0.238788	-0.0160336	0.0582778	-0.0991299	-0.0944974	0.165257	-0.285449	0.0494569	0.242928	-0.0156496	0.0168017	-0.361404	-0.148071	-0.126829	-0.0930333
TG.53.5	-0.33697	-0.473615	0.131881	0.28408	-0.405113	0.0952895	0.227327	0.451245	-0.545743	-0.127057	0.284716	0.170273	0.207909	0.21577	-0.0441884	0.357576	-0.257198	-0.0983858	0.646193	-0.000492049	0.284488	0.156172	0.576802	0.361092	0.468227	0.374989	0.0192979	0.183114	0.187219	-0.0654305	-0.0367957	0.164392	0.278836	-0.00334834	0.194419	0.030435	0.260282	0.581542	0.50477	-0.131233	0.0886169	-0.0387639	-0.151899	0.21565	0.105191	0.0674827	0.263714	0.155608	0.362064
TG.53.6	-0.236616	-0.176814	-0.148575	-0.0548215	-0.211689	-0.137954	-0.113303	0.040024	-0.0131773	-0.0672667	-0.0251065	-0.059598	0.15544	0.0924332	-0.12354	0.0580258	-0.180438	-0.138122	0.172289	0.0912931	0.115032	-0.00682868	0.15808	-0.0679748	0.28186	-0.0126133	-0.0806961	-0.0520372	0.06039	0.0578818	-0.103078	-0.0456526	-0.0993579	-0.174113	0.0455806	-0.134893	-0.060438	0.115332	0.266271	0.050237	-0.00906091	-0.0471527	-0.207837	0.00441644	-0.0588059	-0.102034	0.0886889	0.122028	0.102358
TG.54.0	0.00289229	-0.00842484	0.0154575	-0.00607261	0.00562856	0.040396	-0.0643624	0.151263	-0.000576058	0.00985298	0.0635584	0.0877648	0.320888	0.220654	0.0335074	0.121764	-0.131785	-0.0782718	0.190879	0.0110291	0.0783558	-0.121272	0.297678	-0.113951	0.31622	0.122772	-0.212949	-0.262058	-0.0672067	-0.209097	-0.501458	-0.203456	-0.0576778	-0.0731233	0.301602	-0.23688	-0.0416562	0.261626	0.320276	-0.145359	0.289169	-0.0474767	-0.132637	0.165797	0.365797	0.373633	0.450609	0.348971	0.418686
TG.54.1	0.00540054	0.0159016	-0.0435043	-0.131569	-0.0122532	-0.0216022	-0.144074	-0.0320432	0.0890009	-0.0618662	-0.0220342	-0.0252265	0.340354	0.226295	-0.0450285	0.0049925	-0.0323072	-0.0183858	-0.0115572	0.0551215	0.0628983	-0.238356	0.12396	-0.295566	0.290273	-0.0819562	-0.232463	-0.430639	-0.20228	-0.273615	-0.629319	-0.380762	-0.198848	-0.0969817	0.346583	-0.204668	-0.209949	0.194623	0.232367	-0.0908251	0.220402	-0.0718392	-0.151419	0.0162616	0.266979	0.325965	0.361236	0.377366	0.289925
TG.54.2	0.039892	0.0321752	0.0481008	-0.040036	0.00685268	0.103798	-0.0444284	0.0293189	0.0581698	0.0342514	0.0537174	0.0322232	0.266943	0.251113	0.0218302	0.00482448	-0.0150855	0.0536214	0.0282388	-0.00135614	0.0408161	-0.314599	0.149223	-0.301026	0.337546	-0.149655	-0.260774	-0.425311	-0.257354	-0.288269	-0.653813	-0.391359	-0.132997	-0.04048	0.388179	-0.020066	-0.100786	0.197192	0.258866	-0.0964056	0.305083	-0.0419082	-0.235692	0.0863966	0.241164	0.358116	0.406709	0.348731	0.322796
TG.54.3	0.00519652	0.0457606	-0.00634864	-0.0155296	0.0260666	0.0825443	-0.0492649	-0.0518932	0.110723	0.0489529	0.0516772	-0.0246745	0.264482	0.207453	0.050501	-0.0030243	0.00570057	0.0531653	0.089601	-0.179538	-0.0476448	-0.113723	0.0487609	-0.182274	0.204068	-0.184566	-0.270423	-0.357516	-0.30039	-0.225107	-0.429091	-0.303678	0.00876088	-0.0207141	0.193003	0.0871647	-0.0509811	0.131449	0.221086	0.0661506	0.168509	0.0460486	-0.134137	0.0357396	0.181278	0.208125	0.293333	0.228659	0.242292
TG.54.4	-0.116004	-0.139214	0.0652265	0.202268	-0.0978698	0.136706	0.102754	0.203252	-0.165881	0.0382958	0.190315	0.104446	0.228227	0.173321	0.0974977	0.155836	-0.110303	0.00872487	0.352163	-0.277768	0.0418242	0.134461	0.305383	0.218818	0.27658	0.113159	-0.222886	-0.0682028	-0.132529	-0.227519	-0.17877	-0.0457126	0.209433	-0.0476448	0.191011	0.113159	0.204764	0.340462	0.357888	-0.0675788	0.218218	0.0125893	-0.0729793	0.19574	0.19658	0.193975	0.359484	0.148839	0.352583
TG.54.5	-0.141278	-0.155056	0.0574737	0.242676	-0.111011	0.127837	0.129529	0.244848	-0.163756	0.0448725	0.196844	0.139094	0.191983	0.156808	0.119508	0.204596	-0.154083	-0.0284908	0.385395	-0.262514	0.029907	0.144902	0.320216	0.26147	0.281896	0.189271	-0.162472	0.0280468	-0.0477648	-0.187507	-0.105491	0.0318872	0.229811	-0.0207381	0.164476	0.130513	0.289325	0.339922	0.355116	-0.0374077	0.219514	-0.00320432	-0.0628743	0.246001	0.187351	0.17781	0.33973	0.158536	0.3564
TG.54.6	-0.124248	-0.070303	-0.0589619	0.15676	-0.069751	0.00144014	0.0283468	0.0661386	0.0140894	0.0464926	0.0971377	0.079808	0.0555536	0.070339	0.0944134	0.141218	-0.101242	0.0174737	0.205221	-0.165197	-0.0450045	0.147387	0.0655146	0.120444	0.21997	0.109979	-0.0561536	0.030039	-0.0010441	-0.0679748	-0.0255506	0.039568	0.149499	-0.010009	0.0722832	0.0949775	0.22015	0.0784398	0.138758	0.182454	0.120492	0.0251065	-0.0682268	0.226271	0.1564	0.0634383	0.197888	0.199484	0.212601
TG.54.7	-0.127501	-0.0547615	-0.0871407	0.120948	-0.0516652	-0.0324272	0.0188179	0.0417402	-0.0151695	0.0449565	0.0832283	0.106859	0.019526	0.0521572	0.0470327	0.147195	-0.0639904	0.0765437	0.183738	-0.102142	-0.00547255	0.118692	0.0419922	0.10111	0.263618	0.116412	-0.0460726	0.0293069	0.125641	-0.10147	-0.0609181	0.0826883	0.0993939	-0.0607621	0.0810201	0.0467687	0.198116	0.0848485	0.151983	0.16102	0.0958776	-0.00144014	-0.109547	0.292325	0.116088	0.0188899	0.14441	0.192571	0.165689
TG.54.8	-0.102214	0.00223222	-0.128905	0.0356196	0.00726073	-0.0874527	-0.0266787	0.0511491	0.0148575	-0.00975698	0.0872247	0.0927693	-0.00784879	0.0890009	-0.02045	0.121968	-0.0623342	0.069727	0.152271	0.0565137	0.0541734	0.0681308	0.0662466	0.0888929	0.237912	0.17661	0.0265587	0.140966	0.315572	-0.0527453	-0.0357276	0.206505	0.0545095	-0.0278308	-0.000288029	0.0270507	0.145311	0.079796	0.140486	0.148959	0.0426523	-0.0455206	-0.159628	0.307375	0.0775158	-0.0171737	0.109403	0.222586	0.148839
TG.55.1	-0.321104	-0.207165	-0.319532	-0.275044	-0.135674	-0.356892	-0.395548	-0.257282	-0.0346355	-0.0313351	-0.187879	-0.328077	0.272571	-0.0718752	-0.136394	-0.190255	-0.0311671	-0.210537	0.0154335	-0.00879688	0.029631	0.344878	-0.01979	0.0218422	-0.0651305	0.0489169	-0.132625	-0.0255866	0.0953735	-0.0174737	0.247813	0.030327	0.0325353	-0.307351	-0.23724	-0.343438	-0.291293	-0.0176778	-0.0283468	0.0405641	-0.316004	0.00207621	0.246433	-0.0759676	0.120024	-0.255662	-0.0386079	-0.165605	-0.0772397
TG.55.2	-0.35856	-0.293393	-0.239712	-0.149343	-0.206805	-0.285065	-0.299862	-0.22003	-0.0943054	-0.118392	-0.142538	-0.225827	0.237552	-0.128293	-0.175314	-0.070123	-0.0529253	-0.190531	0.0135734	-0.125809	0.0629103	0.445785	-0.0114491	0.0925773	0.00726073	0.0734113	-0.177942	0.0307111	0.0962856	-0.0132253	0.298026	0.110759	0.173897	-0.247597	-0.190879	-0.311599	-0.310375	0.0194539	0.0169097	0.00483648	-0.224674	-0.000552055	0.218026	-0.0318872	0.0718872	-0.23676	-0.0774917	-0.0944494	-0.0614221
TG.55.3	-0.164896	-0.290429	0.0839484	0.0756556	-0.240888	0.117264	0.0693549	0.248617	-0.287885	-0.0521332	0.236304	0.108239	0.176766	0.310051	-0.0308191	0.163156	-0.108455	-0.0556976	0.367585	0.0694269	0.295914	-0.111527	0.53709	0.0956976	0.479352	0.148311	-0.090057	-0.152787	0.00142814	-0.179022	-0.399952	-0.0810561	0.0865767	-0.0527093	0.353183	-0.00114011	0.0209301	0.481404	0.500822	-0.29841	0.24276	-0.00976898	-0.31508	0.155524	0.234491	0.335554	0.475704	0.296178	0.486289
TG.55.4	-0.269787	-0.220402	-0.187243	-0.127645	-0.254545	-0.149535	-0.132685	-0.0710111	-0.00691269	-0.14123	0.0276988	-0.104722	0.151299	0.0611581	-0.194803	0.0010081	0.00724873	-0.0830963	0.0137534	-0.174701	-0.0324872	0.104902	0.00615662	-0.0872487	0.167561	-0.149607	-0.115236	-0.181014	-0.196724	-0.152031	-0.180246	-0.140162	0.10273	-0.0280228	0.223786	-0.0560936	-0.184422	0.0581818	0.07982	-0.030111	0.120828	0.166505	-0.070351	-0.0187579	0.0915812	0.125125	0.0868407	0.14033	0.117252
TG.55.5	0.160192	0.0655266	0.0881848	0.134113	-0.0560456	0.102502	0.089553	0.140462	0.111299	0.0337354	0.187723	0.116988	0.111251	0.250321	0.19664	0.0275068	0.0675308	0.0309871	0.0242304	0.170933	0.18141	-0.0512211	0.100606	0.0163216	0.107543	0.126613	0.286649	0.0446085	0.112151	0.0945575	-0.0985419	0.0248185	0.120204	0.0724152	0.0535374	-0.00986499	-0.0374197	0.101962	0.0521212	0.211881	0.0671707	0.0113771	-0.112343	0.0626703	0.230495	0.22291	0.245113	0.303306	0.255878
TG.55.8	0.0443684	0.0548695	0.0557216	0.101842	-0.00718872	0.0882328	0.129445	0.314779	-0.157144	-0.029979	0.145599	0.201068	-0.0421122	0.24276	0.0339154	0.192463	-0.195128	0.281716	0.178194	0.149247	0.176862	0.0113651	0.273483	0.276592	0.349919	0.374593	0.20024	0.372733	0.552955	0.0256226	-0.0523612	0.46471	0.0425083	0.170057	0.240948	0.0114971	0.290717	0.288701	0.347483	-0.0527813	0.210093	-0.232979	-0.136346	0.438572	0.183126	0.157132	0.286037	0.388539	0.331017
TG.56.0	-0.0434443	-0.0355956	0.000768077	-0.0521212	0.00166817	-0.0274227	-0.109931	0.070267	0.0592979	-0.0836484	0.0529013	0.0260786	0.344182	0.231479	0.0205101	0.0683948	-0.0907891	-0.182538	0.154767	0.150519	0.10405	-0.125605	0.328785	-0.0617342	0.19754	0.178674	-0.111287	-0.120456	0.0822082	-0.0979298	-0.254401	-0.0994539	-0.117456	-0.123648	0.0822682	-0.165161	0.00650465	0.249781	0.242232	-0.0982058	0.0531053	-0.14429	-0.00747675	0.147447	0.236136	0.210225	0.342214	0.23994	0.349847
TG.56.1	-0.0617582	-0.0578338	-0.0549415	-0.0978698	-0.0370837	-0.0223222	-0.138794	0.0538254	0.0105371	-0.00150015	0.0253465	0.0367717	0.327657	0.286169	-0.0148575	0.0830723	-0.0957096	-0.0408401	0.131413	0.111947	0.0623942	-0.185491	0.290297	-0.173789	0.317816	0.100126	-0.244608	-0.307807	-0.0592979	-0.254749	-0.5155	-0.234251	-0.176886	-0.11508	0.379226	-0.162772	-0.0129133	0.311023	0.332589	-0.130513	0.172433	-0.150015	-0.160324	0.133789	0.290189	0.25787	0.421206	0.334353	0.39892
TG.56.2	-0.0277708	-0.00530453	-0.0224062	-0.0487969	0.00811281	0.0338314	-0.0661026	0.0562376	0.0510771	0.039928	0.0632103	0.0361836	0.354455	0.288869	-0.00342034	0.0688269	-0.00466847	0.0605461	0.108647	0.0821722	0.0625383	-0.235764	0.179718	-0.24384	0.341122	-0.00174017	-0.272943	-0.355392	-0.138374	-0.257258	-0.550807	-0.307759	-0.176298	-0.141398	0.349235	-0.108431	-0.0482448	0.20078	0.287585	-0.0350315	0.159232	-0.143774	-0.131305	0.109487	0.268779	0.226631	0.326877	0.30237	0.289781
TG.56.3	0.0189499	0.0290669	0.0345275	0.029967	0.0205221	0.149703	0.0388479	0.0620102	0.0578098	0.0908731	0.184422	0.0371197	0.256586	0.274923	0.0420762	0.0813081	-0.0384158	0.0448245	0.0969697	-0.0374077	0.0627063	-0.190207	0.141626	-0.161908	0.353603	-0.128953	-0.22363	-0.358152	-0.251173	-0.237888	-0.494941	-0.289385	-0.00278428	-0.0691029	0.384266	0.0845845	-0.0160216	0.175146	0.263666	-0.0335314	0.217186	-0.0319232	-0.181818	0.0509331	0.254269	0.341782	0.381986	0.310207	0.357732
TG.56.4	-0.00246025	-0.0281908	0.0275308	0.089793	-0.0522052	0.14075	0.14261	0.126337	0.00552055	0.0635344	0.198548	0.139982	0.146895	0.24396	0.133693	0.233039	-0.070075	0.137726	0.218434	-0.0619262	0.0347195	-0.121428	0.0969937	-0.0969937	0.279424	-0.080348	-0.127549	-0.211545	-0.234431	-0.11862	-0.333381	-0.177546	0.0459526	0.0666427	0.332697	0.178074	0.168329	0.154899	0.169817	0.079688	0.218734	0.0105611	-0.211533	0.146955	0.158584	0.325845	0.340138	0.261146	0.324356
TG.56.5	0.127789	0.0619382	0.151191	0.188143	-0.0146175	0.197732	0.259154	0.359604	0.0272907	0.112895	0.276892	0.246301	0.0130093	0.172601	0.187075	0.19688	-0.129925	0.0870207	0.1579	0.147063	0.0756556	-0.0981338	0.161932	0.0607141	0.227903	0.0939334	0.246181	0.196472	0.0882688	0.200216	-0.0293909	0.121716	0.171437	0.242448	0.184818	0.221026	0.221314	0.0308791	-0.00442844	0.235116	0.258398	0.0378758	-0.202892	0.22177	0.0829283	0.320624	0.272511	0.281596	0.278764
TG.56.6	0.0811401	0.0214221	0.120096	0.108131	-0.0282028	0.134749	0.21853	0.365845	-0.0369397	0.0465647	0.2445	0.219274	-0.070447	0.145803	0.131077	0.199304	-0.148731	0.0975098	0.16198	0.206601	0.10303	-0.137402	0.202088	0.0746835	0.164968	0.139286	0.286109	0.341974	0.236904	0.309955	0.100534	0.254785	0.170825	0.248857	0.0920972	0.230363	0.225875	0.0132853	0.0238464	0.193231	0.223066	-0.0311431	-0.128917	0.20072	-0.000864086	0.235908	0.168785	0.177666	0.195092
TG.56.7	0.10219	0.0419682	0.138602	0.10435	1.20012e-05	0.153675	0.202076	0.339046	-0.0243744	0.0730993	0.233531	0.224914	-0.0659586	0.137894	0.0880048	0.143222	-0.090393	0.160492	0.117396	0.183834	0.108671	-0.164212	0.18207	0.0919412	0.165413	0.132181	0.29817	0.350783	0.3155	0.202892	0.0344914	0.329049	0.102346	0.192739	0.111443	0.166973	0.163888	0.030015	0.0378038	0.136502	0.264374	-0.0691749	-0.170669	0.236436	0.00956496	0.270411	0.205113	0.261614	0.232847
TG.56.8	0.0549535	0.0307951	0.0966697	0.0976178	0.00392439	0.117648	0.179214	0.294005	-0.0446685	0.0726073	0.211317	0.201176	-0.120492	0.0715152	0.0792319	0.111467	-0.117828	0.184422	0.0889769	0.129265	0.0626103	-0.143258	0.168653	0.130753	0.210729	0.174893	0.279964	0.358092	0.374953	0.128041	0.0150615	0.351455	0.115056	0.148083	0.126025	0.119784	0.200396	0.0479568	0.039652	0.102166	0.278248	-0.049973	-0.16276	0.303558	0.0176058	0.233099	0.189907	0.267063	0.227411
TG.56.9	-0.00687669	-0.0312631	0.0518572	0.115068	-0.0369037	0.0769037	0.168329	0.386907	-0.167969	0.0254065	0.23514	0.269475	-0.0738914	0.0785239	0.0751515	0.209097	-0.166577	0.178938	0.215134	0.137582	0.147567	-0.0107411	0.307747	0.266883	0.307723	0.328305	0.238164	0.423006	0.543978	0.0570417	0.0463246	0.435248	0.176874	0.0628023	0.109211	0.0363276	0.29523	0.22291	0.1985	-0.00378038	0.233783	-0.0891689	-0.152043	0.419382	0.0161896	0.176718	0.226475	0.206589	0.283564
TG.57.3	0.0276628	8.40084e-05	0.154647	0.150807	0.0250705	0.163372	0.165137	0.315308	-0.142598	0.0239064	0.296958	0.172745	0.131677	0.344074	0.14087	0.340378	-0.242016	0.10033	0.204548	0.183306	0.277372	-0.105359	0.425095	0.232655	0.425095	0.376238	0.0170177	0.0568497	0.19616	-0.206361	-0.349271	0.0758116	0.00613261	0.00307231	0.368653	-0.00291629	0.239688	0.520336	0.364836	-0.252589	0.252853	-0.218506	-0.267819	0.370993	0.293309	0.34003	0.480348	0.397756	0.533621
TG.58.1	-0.0779838	-0.0584938	-0.0519892	-0.0541734	-0.00577258	-0.0405761	-0.111527	0.0989259	-0.000732073	0.00766877	0.0583498	0.0228863	0.393615	0.276376	-0.0591419	0.128653	-0.0716712	-0.0280228	0.165977	0.137186	0.0343234	-0.158248	0.289541	-0.129205	0.310555	0.127633	-0.286961	-0.301794	-0.0351155	-0.350603	-0.493585	-0.254773	-0.146487	-0.201344	0.371881	-0.256874	-0.059886	0.406877	0.317924	-0.0993459	0.0708551	-0.157432	-0.106247	0.039808	0.263486	0.187519	0.349763	0.271755	0.355068
TG.58.10	0.0179898	0.00241224	0.060054	0.0958056	-0.010129	0.0654665	0.137702	0.325545	-0.0658026	0.0509811	0.208653	0.21811	-0.100282	0.0484848	0.080132	0.169169	-0.0866247	0.163984	0.0913771	0.163504	0.131569	0.00536454	0.168473	0.250201	0.109367	0.303258	0.374749	0.552931	0.57511	0.234983	0.217126	0.530093	0.184662	0.125677	-0.0232583	0.050141	0.180006	0.0341434	0.0132493	0.110387	0.144926	-0.0583258	-0.0711071	0.29913	0.0121332	0.160228	0.151527	0.218002	0.206205
TG.58.11	-0.0245545	-0.0310831	0.0114491	0.0723672	-0.0317792	0.0341314	0.110807	0.340978	-0.141914	0.069811	0.196016	0.216262	-0.132037	0.01997	0.050369	0.209733	-0.139574	0.154071	0.141782	0.158416	0.138578	0.0243984	0.252241	0.302898	0.221338	0.356004	0.295374	0.496262	0.626511	0.112079	0.134881	0.524692	0.149703	0.0363996	0.0368677	-0.00442844	0.276856	0.150219	0.119688	0.0355836	0.168869	-0.0624302	-0.0908251	0.429103	0.0177378	0.13925	0.178926	0.167849	0.222994
TG.58.2	-0.0421482	-0.00687669	-0.0357036	-0.0566337	0.0447285	-0.00955296	-0.0759916	-0.00966097	0.131293	0.0482808	0.0842604	0.0505971	0.359748	0.287093	0.0135134	0.140918	-0.00606061	-0.00448845	0.107051	0.141446	0.0817882	-0.192475	0.155236	-0.212349	0.241812	0.0256346	-0.271119	-0.335278	-0.0606661	-0.23982	-0.457786	-0.260198	-0.231191	-0.135818	0.256178	-0.124512	-0.0414041	0.215782	0.25595	-0.00723672	0.00178818	-0.162364	-0.129541	0.0776118	0.195152	0.146511	0.27886	0.312847	0.314731
TG.58.3	-0.1197	-0.0577138	-0.128581	-0.0853165	-0.00871287	-0.0506811	-0.126385	-0.0110531	0.0911251	0.030183	0.0768317	-0.00133213	0.4	0.267243	-0.049745	0.132193	-0.0619502	-0.0255266	0.109547	0.0433483	0.069991	-0.169973	0.164476	-0.164428	0.275848	0.00948095	-0.294737	-0.326853	-0.132241	-0.258482	-0.458074	-0.257534	-0.185059	-0.155056	0.286625	-0.0919172	-0.0374917	0.232583	0.274311	0.000132013	0.0524932	-0.145431	-0.121872	0.090417	0.204476	0.157516	0.257162	0.267495	0.287897
TG.58.4	0.0740834	0.0491209	0.0712631	0.0607261	0.0357996	0.120396	0.0793279	0.191671	-0.00220822	0.117888	0.187279	0.182262	0.214737	0.244452	0.140066	0.177798	-0.121308	0.173381	0.0557216	0.125293	0.10327	-0.329817	0.225695	-0.221458	0.468155	0.0320792	-0.205749	-0.308599	-0.0856526	-0.313183	-0.633915	-0.299886	-0.252037	-0.0454965	0.609409	-0.0506451	0.150207	0.302082	0.262418	-0.204368	0.325077	-0.207585	-0.219622	0.237516	0.215278	0.387207	0.430003	0.3973	0.421218
TG.58.5	0.165701	0.0735794	0.168797	0.11874	0.0115332	0.215422	0.288269	0.310207	0.0791239	0.166709	0.33631	0.287897	0.0633543	0.283168	0.266535	0.231827	-0.111131	0.050213	0.115044	0.230027	0.0754155	-0.310963	0.13949	-0.218866	0.234911	-0.00807681	0.00912091	-0.128125	-0.132673	0.0889169	-0.282544	-0.145455	-0.0824362	0.212841	0.387243	0.187111	0.188719	0.0180618	0.0319712	0.0142094	0.160624	-0.0614461	-0.171881	0.0956496	-0.00891689	0.326889	0.251737	0.239304	0.2827
TG.58.7	0.020018	-0.0240024	0.0694029	0.0446565	-0.0661266	0.0708791	0.187399	0.324056	-0.0161416	0.0473687	0.251665	0.228011	0.00844884	0.19538	0.120696	0.204404	-0.142166	0.156784	0.152163	0.310519	0.113195	-0.111263	0.201524	0.0380918	0.207777	0.167897	0.254305	0.300438	0.310987	0.285869	0.0889049	0.267123	0.0968017	0.168689	0.133897	0.129373	0.156724	0.0230063	-0.0550855	0.179466	0.137414	-0.0905851	-0.134569	0.199124	0.0516172	0.222826	0.189295	0.224302	0.233243
TG.58.8	0.00276028	-0.0685149	0.109451	0.119364	-0.0590699	0.127813	0.205701	0.450273	-0.18051	0.0325593	0.25511	0.271383	-0.0369637	0.0670627	0.0975578	0.221302	-0.165713	0.140318	0.266355	0.123948	0.170321	-0.0526853	0.364092	0.263678	0.248605	0.285197	0.234599	0.44192	0.443936	0.137474	0.0873687	0.442628	0.175374	0.127285	0.134113	0.0952295	0.268875	0.225959	0.145083	-0.0282628	0.275008	-0.0644704	-0.135938	0.353147	0.0364356	0.29727	0.271359	0.212145	0.32492
TG.58.9	0.0361716	-0.0291269	0.120948	0.146343	-0.0182298	0.133861	0.19934	0.443348	-0.169673	0.0557816	0.254569	0.266403	-0.0733873	0.069571	0.105263	0.206241	-0.19574	0.116076	0.233411	0.138962	0.175266	-0.000264026	0.337546	0.291581	0.220726	0.328509	0.278452	0.50111	0.508575	0.161416	0.124872	0.476544	0.230711	0.130477	0.10399	0.0779598	0.272847	0.179262	0.127345	-0.0183378	0.276496	-0.050045	-0.0948935	0.363864	0.0381518	0.262838	0.262226	0.202688	0.286865
TG.60.10	0.0547855	-0.0387279	0.140582	0.142274	-0.0420042	0.142574	0.220654	0.498986	-0.147699	0.0570897	0.330765	0.330177	-0.0857006	0.131737	0.0948095	0.291821	-0.154083	0.0892169	0.268635	0.294677	0.27742	-0.0652025	0.372565	0.30285	0.197156	0.362472	0.374677	0.561788	0.531281	0.276784	0.197492	0.528509	0.140438	0.164932	0.0418722	0.0878008	0.228755	0.148887	0.106787	-0.00682868	0.246445	-0.0790039	-0.119328	0.33727	0.0288389	0.290873	0.258626	0.1979	0.311419
TG.60.11	0.101062	0.0156976	0.182934	0.162676	0.0089769	0.188719	0.23694	0.488653	-0.141206	0.0705311	0.27586	0.354839	-0.150195	0.0917012	0.120348	0.2445	-0.127645	0.187399	0.153603	0.236052	0.178254	-0.0793999	0.287837	0.253009	0.271971	0.378626	0.397216	0.540174	0.592307	0.204596	0.0967777	0.530669	0.152535	0.199616	0.189991	0.0906811	0.318536	0.150459	0.117792	-0.0334473	0.239436	-0.122604	-0.125485	0.411449	0.0538494	0.320816	0.285461	0.278152	0.321344
TG.60.12	0.0766997	0.0186139	0.0941854	0.0873087	0.010285	0.113351	0.169469	0.385263	-0.105515	0.0753675	0.213141	0.29823	-0.154527	0.0412241	0.0740354	0.157204	-0.0990699	0.203348	0.12468	0.230435	0.159772	-0.114923	0.256502	0.211149	0.244476	0.282604	0.322112	0.448497	0.560924	0.0988419	0.0330033	0.46075	0.109643	0.117972	0.102802	0.0382838	0.243012	0.126757	0.0860246	0.020414	0.287993	-0.0716472	-0.159268	0.38345	0.0449205	0.268947	0.234719	0.242352	0.255806
TG.62.1	-0.291137	-0.281848	-0.156544	-0.125893	-0.220366	-0.167561	-0.172409	0.0763756	-0.151203	-0.18273	0.00674467	-0.0919892	0.408773	0.210981	-0.177018	0.135674	-0.137222	-0.0969697	0.177738	0.122196	0.0709151	-0.0315992	0.308815	-0.0441284	0.323528	0.164284	-0.152271	-0.179154	0.10129	-0.208245	-0.299934	-0.0589979	-0.0678308	-0.197696	0.243552	-0.274815	-0.10393	0.374305	0.310783	-0.107099	-0.0215902	-0.128869	-0.100798	0.0286709	0.172133	0.149259	0.279472	0.277792	0.347003
TG.62.14	0.000360036	-0.0517012	0.101842	0.133621	-0.0451125	0.101242	0.122856	0.304494	-0.122796	0.050477	0.139238	0.254965	-0.158668	0.0109331	0.0547855	0.150003	-0.124188	0.129709	0.169925	0.0876928	0.0634863	-0.0176298	0.208605	0.21859	0.16156	0.308011	0.293573	0.471707	0.575146	0.11652	0.131701	0.493057	0.236652	0.0471167	0.039844	0.00964897	0.236808	0.126217	0.0887729	-0.0225263	0.119664	-0.0354275	-0.11796	0.356088	-0.00776478	0.191611	0.222046	0.191107	0.258326
[truncated: 538 more columns]
